# Supplementary material for: Identification of RNA-Binding Proteins as Targetable Putative Oncogenes in Neuroblastoma
Source: Int J Mol Sci. 2020 Jul 19;21(14):5098. doi: 10.3390/ijms21145098 (PMC7403987; doi:10.3390/ijms21145098)
Supplement: Supplementary file 1 [file ijms-21-05098-s001.zip › ijms-797756-S.xlsx]

## Sheet: Table S1 MNA status DE
HUGO	R	Combi	pval (FDR)	Expressed in number of tumours (total is 493)
RPL22L1	0.701	mycn_status: 1 >= 0	6.18e-39	493						#Program: R2: Genomics analysis and visualization platform
ZCCHC17	-0.713	mycn_status: 1 < 0	2.18e-37	493						#Website: http://r2.amc.nl
CPEB4	-0.677	mycn_status: 1 < 0	3.76e-37	493						#Developer: Jan Koster (jankoster@amc.uva.nl)
NPM1 apoptosis,signal transduction	0.637	mycn_status: 1 >= 0	8.39e-34	493						#Support: r2-support@amc.uva.nl
FBL	0.605	mycn_status: 1 >= 0	2.2e-33	493						#Date: Thu Mar 5 12:20:47 2020
TDRD7	-0.627	mycn_status: 1 < 0	2.62e-33	493						#Dataset: ps_avgpres_gse49710geo498_ag44kcwolf
EXOSC10	-0.613	mycn_status: 1 < 0	2.76e-33	493						#Pretty_dataset: Tumor Neuroblastoma - SEQC - 498 - custom - ag44kcwolf
PTBP3	-0.633	mycn_status: 1 < 0	1.08e-32	493						#Genefiltering: applied
EEF1B2	0.584	mycn_status: 1 >= 0	1.87e-32	493						#Genefilters: RBPs_2014 only
TRNAU1AP	-0.581	mycn_status: 1 < 0	1.89e-32	493						#Data transformation: transform_2log
SRRM1	-0.607	mycn_status: 1 < 0	2.82e-32	493						#Data values:
PNRC2	-0.615	mycn_status: 1 < 0	4.99e-32	493						#Comparison: groups
RPL39	0.508	mycn_status: 1 >= 0	1.92e-31	493						#Track: mycn_status
BZW2 development,differentiation	0.56	mycn_status: 1 >= 0	1.94e-30	493						#Group: mycn_status -> 0
SMG6	-0.558	mycn_status: 1 < 0	2.51e-30	493						#Group: mycn_status -> 1
LRRC47	-0.562	mycn_status: 1 < 0	3.79e-30	493						#Test: kruskal
UHMK1 kinase	-0.555	mycn_status: 1 < 0	4.79e-30	493						#Output: kruskal 0.05 fdr
EIF4G3	-0.564	mycn_status: 1 < 0	5.58e-30	493						#Minimal presentcalls: 100
RPS3	0.545	mycn_status: 1 >= 0	5.86e-30	493						#Minimal highest expression: 50
SNRPF	0.537	mycn_status: 1 >= 0	6.74e-30	493						#Subset: TRACKER (493)
GNL1 signal transduction	-0.566	mycn_status: 1 < 0	6.8e-30	493						#Subset_string: TRACKER:3ca2bfa9b2fed4dd7e9794fbc54e3f25
SRRM3	-0.538	mycn_status: 1 < 0	8.9e-30	493						#Number of lines: 1103
SRSF4	-0.567	mycn_status: 1 < 0	1.52e-29	493						#r2filetype: datasetresult
PUS7	0.581	mycn_status: 1 >= 0	1.57e-29	493
SNRPD1	0.545	mycn_status: 1 >= 0	1.66e-29	493
MKRN1	-0.552	mycn_status: 1 < 0	8.97e-29	493
CELF6	-0.548	mycn_status: 1 < 0	9.71e-29	493
RPL36	0.56	mycn_status: 1 >= 0	1.05e-28	493
RRP9	0.568	mycn_status: 1 >= 0	3.16e-28	493
SNIP1	-0.518	mycn_status: 1 < 0	7.26e-28	493
IPO13	-0.573	mycn_status: 1 < 0	1.09e-27	493
RPL18A	0.513	mycn_status: 1 >= 0	5.44e-27	493
C17orf85	-0.523	mycn_status: 1 < 0	6.05e-27	493
CELF4	-0.511	mycn_status: 1 < 0	9.84e-27	493
ELAVL4	-0.532	mycn_status: 1 < 0	1.65e-26	493
TRIT1	-0.538	mycn_status: 1 < 0	1.89e-26	493
CDK9 kinase	-0.5	mycn_status: 1 < 0	2.41e-26	493
CELF5	-0.496	mycn_status: 1 < 0	3.45e-26	493
RPS13	0.491	mycn_status: 1 >= 0	5.92e-26	493
RPS11	0.493	mycn_status: 1 >= 0	7.31e-26	493
LSM10	-0.534	mycn_status: 1 < 0	7.82e-26	493
GNL3	0.519	mycn_status: 1 >= 0	7.84e-26	493
ATXN1 differentiation	-0.519	mycn_status: 1 < 0	1.34e-25	493
PURA apoptosis,development	-0.531	mycn_status: 1 < 0	1.87e-25	493
CPEB3	-0.527	mycn_status: 1 < 0	1.89e-25	493
PUM1	-0.514	mycn_status: 1 < 0	2.38e-25	493
SNRNP40	-0.516	mycn_status: 1 < 0	4.19e-25	493
CPEB2	-0.503	mycn_status: 1 < 0	5.64e-25	493
SBDS	-0.505	mycn_status: 1 < 0	7.96e-25	493
HABP4	-0.511	mycn_status: 1 < 0	8.14e-25	493
PPP1R8	-0.499	mycn_status: 1 < 0	1.67e-24	493
APEX1 DNA repair,drug target	0.471	mycn_status: 1 >= 0	1.77e-24	493
CMSS1	0.497	mycn_status: 1 >= 0	2.1e-24	493
RBMX	0.489	mycn_status: 1 >= 0	2.13e-24	493
ZNF239	0.475	mycn_status: 1 >= 0	2.5e-24	493
LSM7	0.471	mycn_status: 1 >= 0	6.09e-24	493
RNASEH2C	0.454	mycn_status: 1 >= 0	6.97e-24	493
SSU72	-0.494	mycn_status: 1 < 0	7.03e-24	493
EXO1 DNA repair,cell cycle	0.456	mycn_status: 1 >= 0	7.21e-24	493
NOA1	0.495	mycn_status: 1 >= 0	8.51e-24	493
SUPT6H signal transduction,transcription factor	-0.481	mycn_status: 1 < 0	9.07e-24	493
CELF2	-0.45	mycn_status: 1 < 0	1.31e-23	493
EEF1D signal transduction	0.482	mycn_status: 1 >= 0	1.48e-23	493
RBM47	-0.491	mycn_status: 1 < 0	2.47e-23	493
RNASEH2A	0.453	mycn_status: 1 >= 0	3.12e-23	493
ZC3H8	0.499	mycn_status: 1 >= 0	4.33e-23	493
AUH	-0.472	mycn_status: 1 < 0	4.78e-23	493
NOC2L	-0.474	mycn_status: 1 < 0	5.95e-23	493
RPS21 differentiation	0.455	mycn_status: 1 >= 0	5.99e-23	493
SPEN signal transduction	-0.448	mycn_status: 1 < 0	8.15e-23	493
RPS15	0.485	mycn_status: 1 >= 0	8.21e-23	493
LAS1L	0.447	mycn_status: 1 >= 0	8.43e-23	493
THG1L	0.43	mycn_status: 1 >= 0	1.06e-22	493
RPS16	0.457	mycn_status: 1 >= 0	1.09e-22	493
NOP16	0.442	mycn_status: 1 >= 0	2e-22	493
CPSF3L	-0.452	mycn_status: 1 < 0	2.27e-22	493
RPL36A	0.478	mycn_status: 1 >= 0	2.28e-22	493
ZFP36L2 transcription factor	-0.498	mycn_status: 1 < 0	2.41e-22	493
THRAP3 signal transduction	-0.489	mycn_status: 1 < 0	2.43e-22	493
BAZ2B	-0.469	mycn_status: 1 < 0	4.51e-22	493
PPIE	-0.481	mycn_status: 1 < 0	6.42e-22	493
RPUSD4	0.468	mycn_status: 1 >= 0	6.91e-22	493
DDX39A	0.443	mycn_status: 1 >= 0	8.33e-22	493
NSUN5	-0.449	mycn_status: 1 < 0	8.36e-22	493
HARS2	-0.456	mycn_status: 1 < 0	1.14e-21	493
RIOK3 kinase	-0.479	mycn_status: 1 < 0	1.62e-21	493
MRPL11	0.438	mycn_status: 1 >= 0	1.77e-21	493
RNF113A development	0.45	mycn_status: 1 >= 0	1.92e-21	493
RRP1	0.472	mycn_status: 1 >= 0	2.58e-21	493
APOBEC3H	-0.473	mycn_status: 1 < 0	2.65e-21	493
ZGPAT	-0.463	mycn_status: 1 < 0	2.69e-21	493
RPL18	0.432	mycn_status: 1 >= 0	2.99e-21	493
NPM3	0.473	mycn_status: 1 >= 0	3.18e-21	493
SYF2	-0.466	mycn_status: 1 < 0	3.2e-21	493
HENMT1	-0.512	mycn_status: 1 < 0	3.98e-21	493
RPL35	0.45	mycn_status: 1 >= 0	4.4e-21	493
MRPL3	0.438	mycn_status: 1 >= 0	4.43e-21	493
ZFR2	-0.438	mycn_status: 1 < 0	5.72e-21	493
RPL28	0.434	mycn_status: 1 >= 0	6.43e-21	493
RPL29 development	0.449	mycn_status: 1 >= 0	9.23e-21	493
NCL development	0.441	mycn_status: 1 >= 0	1.07e-20	493
DKC1	0.448	mycn_status: 1 >= 0	2.4e-20	493
CNP kinase,membrane	-0.439	mycn_status: 1 < 0	2.43e-20	493
DDX10	0.443	mycn_status: 1 >= 0	2.43e-20	493
HEXIM1	-0.443	mycn_status: 1 < 0	2.5e-20	493
GAR1	0.428	mycn_status: 1 >= 0	2.52e-20	493
NOB1	0.442	mycn_status: 1 >= 0	2.92e-20	493
KHDC1	-0.433	mycn_status: 1 < 0	3.3e-20	493
SNRPE	0.429	mycn_status: 1 >= 0	4.24e-20	493
PEG10 signal transduction	-0.419	mycn_status: 1 < 0	6.55e-20	493
MTRF1	-0.425	mycn_status: 1 < 0	6.61e-20	493
ZCCHC11	-0.448	mycn_status: 1 < 0	7.7e-20	493
RBFOX1	-0.465	mycn_status: 1 < 0	7.81e-20	493
SFSWAP	-0.448	mycn_status: 1 < 0	8.14e-20	493
POP5	-0.431	mycn_status: 1 < 0	8.71e-20	493
QTRT1	0.427	mycn_status: 1 >= 0	1.1e-19	493
RPS17	0.437	mycn_status: 1 >= 0	1.25e-19	493
SRPK2 differentiation,kinase	-0.449	mycn_status: 1 < 0	1.29e-19	493
RPS4X development	0.434	mycn_status: 1 >= 0	2.07e-19	493
RBM48	-0.451	mycn_status: 1 < 0	2.13e-19	493
MRPS25	0.429	mycn_status: 1 >= 0	2.23e-19	493
BAZ2A	-0.453	mycn_status: 1 < 0	2.49e-19	493
SRA1 apoptosis,differentiation	-0.445	mycn_status: 1 < 0	2.57e-19	493
RPS5	0.418	mycn_status: 1 >= 0	3.17e-19	493
NOL9	-0.35	mycn_status: 1 < 0	3.64e-19	493
YTHDF2	-0.444	mycn_status: 1 < 0	4.13e-19	493
SNRPD2	0.424	mycn_status: 1 >= 0	4.47e-19	493
SPATS2	-0.429	mycn_status: 1 < 0	4.91e-19	493
RPL41	0.415	mycn_status: 1 >= 0	5.11e-19	493
IPO4	0.398	mycn_status: 1 >= 0	5.76e-19	493
PRPF38A	-0.448	mycn_status: 1 < 0	5.76e-19	493
POLR2H	0.408	mycn_status: 1 >= 0	7.67e-19	493
WBP4	-0.396	mycn_status: 1 < 0	7.78e-19	493
NXF1	-0.408	mycn_status: 1 < 0	9.35e-19	493
RPS25	0.408	mycn_status: 1 >= 0	1.04e-18	493
RUVBL1 cell cycle	0.369	mycn_status: 1 >= 0	1.11e-18	493
RPL35A	0.435	mycn_status: 1 >= 0	1.14e-18	493
EXOSC5	0.404	mycn_status: 1 >= 0	1.14e-18	493
ZC3H13	-0.441	mycn_status: 1 < 0	1.16e-18	493
SECISBP2L	-0.408	mycn_status: 1 < 0	1.16e-18	493
RAN cell cycle,signal transduction	0.395	mycn_status: 1 >= 0	1.17e-18	493
TRMT5	-0.412	mycn_status: 1 < 0	1.23e-18	493
RPS3A apoptosis	0.428	mycn_status: 1 >= 0	1.24e-18	493
RPL36AL	0.439	mycn_status: 1 >= 0	1.33e-18	493
DIMT1	0.431	mycn_status: 1 >= 0	1.4e-18	493
RNASEL kinase	-0.415	mycn_status: 1 < 0	1.56e-18	493
TLR8 drug target,membrane	-0.441	mycn_status: 1 < 0	1.77e-18	493
RRP1B	0.429	mycn_status: 1 >= 0	1.9e-18	493
RPS28	0.416	mycn_status: 1 >= 0	2.72e-18	493
PPRC1	0.443	mycn_status: 1 >= 0	2.8e-18	493
RPL37	0.413	mycn_status: 1 >= 0	3.02e-18	493
TLR7 drug target,membrane	-0.421	mycn_status: 1 < 0	3.32e-18	493
SFPQ DNA repair	-0.416	mycn_status: 1 < 0	4.13e-18	493
APOBEC3G	-0.447	mycn_status: 1 < 0	4.41e-18	493
FAM120B	-0.429	mycn_status: 1 < 0	5.38e-18	493
MCTS1	0.399	mycn_status: 1 >= 0	6.54e-18	493
PARK7 signal transduction	-0.411	mycn_status: 1 < 0	7.07e-18	493
RPL13	0.415	mycn_status: 1 >= 0	7.25e-18	493
RPL32	0.422	mycn_status: 1 >= 0	9.2e-18	493
MOV10 development	-0.439	mycn_status: 1 < 0	1.08e-17	493
CNOT4	-0.37	mycn_status: 1 < 0	1.62e-17	493
RPS24	0.41	mycn_status: 1 >= 0	1.71e-17	493
RBMX2	0.395	mycn_status: 1 >= 0	2.16e-17	493
RPS29	0.409	mycn_status: 1 >= 0	2.44e-17	493
ELAVL2	-0.395	mycn_status: 1 < 0	2.48e-17	493
R3HDM2	-0.381	mycn_status: 1 < 0	2.77e-17	493
RPL10	0.384	mycn_status: 1 >= 0	3.22e-17	493
ZC3HAV1	-0.389	mycn_status: 1 < 0	3.63e-17	493
GTPBP3	0.378	mycn_status: 1 >= 0	3.66e-17	493
SNRPA	0.379	mycn_status: 1 >= 0	4.77e-17	493
METTL1	0.345	mycn_status: 1 >= 0	4.84e-17	493
PLD6	0.403	mycn_status: 1 >= 0	5.61e-17	493
SNRPN	-0.38	mycn_status: 1 < 0	6.23e-17	493
TEP1	-0.448	mycn_status: 1 < 0	7.01e-17	493
MTO1	-0.407	mycn_status: 1 < 0	9.94e-17	493
MRPS2	0.399	mycn_status: 1 >= 0	1.04e-16	493
ERI3	-0.419	mycn_status: 1 < 0	1.05e-16	493
ZCCHC6	-0.409	mycn_status: 1 < 0	1.16e-16	493
RPS19	0.386	mycn_status: 1 >= 0	1.34e-16	493
NUFIP2	-0.424	mycn_status: 1 < 0	1.39e-16	493
RPL10L	0.376	mycn_status: 1 >= 0	1.43e-16	493
BOP1	0.378	mycn_status: 1 >= 0	1.79e-16	493
GTPBP2 signal transduction	-0.399	mycn_status: 1 < 0	1.94e-16	493
DYNC1H1 cell cycle	-0.378	mycn_status: 1 < 0	2.01e-16	493
RNASEK	-0.406	mycn_status: 1 < 0	2.25e-16	493
RNASE6	-0.402	mycn_status: 1 < 0	2.28e-16	493
TRMT1	0.402	mycn_status: 1 >= 0	2.82e-16	493
ZC3H6	-0.394	mycn_status: 1 < 0	3.27e-16	493
LSM4	0.362	mycn_status: 1 >= 0	3.31e-16	493
PARP12	-0.421	mycn_status: 1 < 0	3.92e-16	493
TOE1	-0.397	mycn_status: 1 < 0	4.25e-16	493
TDRD12	-0.341	mycn_status: 1 < 0	4.39e-16	493
BYSL	0.374	mycn_status: 1 >= 0	4.53e-16	493
HBS1L signal transduction	-0.34	mycn_status: 1 < 0	4.54e-16	493
C2orf15	-0.426	mycn_status: 1 < 0	4.69e-16	493
YBX2 differentiation	-0.392	mycn_status: 1 < 0	4.83e-16	493
KIAA0020	0.39	mycn_status: 1 >= 0	6.05e-16	493
HNRNPC	0.352	mycn_status: 1 >= 0	6.23e-16	493
MRPL23	0.367	mycn_status: 1 >= 0	6.35e-16	493
DHX16	-0.381	mycn_status: 1 < 0	8.68e-16	493
U2AF1	0.371	mycn_status: 1 >= 0	8.87e-16	493
APOBEC2	-0.373	mycn_status: 1 < 0	9.32e-16	493
RRNAD1	-0.362	mycn_status: 1 < 0	9.96e-16	493
YARS apoptosis,drug target	-0.369	mycn_status: 1 < 0	1.66e-15	493
GLTSCR2	0.374	mycn_status: 1 >= 0	1.76e-15	493
CTIF	-0.336	mycn_status: 1 < 0	2e-15	493
MRPL48	0.362	mycn_status: 1 >= 0	2.25e-15	493
SETX differentiation	-0.402	mycn_status: 1 < 0	2.51e-15	493
DHX58	-0.408	mycn_status: 1 < 0	2.51e-15	493
RPL9	0.395	mycn_status: 1 >= 0	3.55e-15	493
SRSF10	-0.358	mycn_status: 1 < 0	3.67e-15	493
ZFC3H1	-0.337	mycn_status: 1 < 0	3.72e-15	493
TRIM56	-0.372	mycn_status: 1 < 0	3.91e-15	493
RPL24	0.387	mycn_status: 1 >= 0	3.93e-15	493
EIF4B	0.377	mycn_status: 1 >= 0	3.95e-15	493
ZFP36L1 development,differentiation	-0.39	mycn_status: 1 < 0	4.66e-15	493
SLU7	-0.377	mycn_status: 1 < 0	5.04e-15	493
RPS7	0.399	mycn_status: 1 >= 0	5.47e-15	493
SRSF11	-0.411	mycn_status: 1 < 0	5.48e-15	493
NHP2	0.32	mycn_status: 1 >= 0	5.91e-15	493
EEF2	0.32	mycn_status: 1 >= 0	6.02e-15	493
GEMIN6	0.351	mycn_status: 1 >= 0	6.15e-15	493
SF3B1	-0.376	mycn_status: 1 < 0	8.46e-15	493
ALKBH5 membrane	-0.349	mycn_status: 1 < 0	1.09e-14	493
UPF3A	-0.366	mycn_status: 1 < 0	1.09e-14	493
CLK1 kinase	-0.382	mycn_status: 1 < 0	1.2e-14	493
RPL8	0.359	mycn_status: 1 >= 0	1.21e-14	493
TDRD9	-0.369	mycn_status: 1 < 0	1.21e-14	493
ZCCHC24	-0.38	mycn_status: 1 < 0	1.35e-14	493
PPIL4	-0.377	mycn_status: 1 < 0	1.39e-14	493
TRA2A	-0.294	mycn_status: 1 < 0	1.56e-14	493
LUC7L2	-0.373	mycn_status: 1 < 0	1.59e-14	493
ZC3H12A	-0.384	mycn_status: 1 < 0	1.6e-14	493
HNRNPA1L2	0.321	mycn_status: 1 >= 0	1.67e-14	493
LRRFIP2 signal transduction	-0.377	mycn_status: 1 < 0	1.76e-14	493
VARS drug target	0.342	mycn_status: 1 >= 0	1.92e-14	493
DDX26B	-0.361	mycn_status: 1 < 0	1.95e-14	493
EXOSC9	0.344	mycn_status: 1 >= 0	2.29e-14	493
EARS2 drug target	0.342	mycn_status: 1 >= 0	2.64e-14	493
IFIH1 apoptosis	-0.394	mycn_status: 1 < 0	2.72e-14	493
POLR2K	-0.372	mycn_status: 1 < 0	3.25e-14	493
SARS2	0.35	mycn_status: 1 >= 0	3.45e-14	493
FASTK apoptosis,kinase	-0.362	mycn_status: 1 < 0	3.66e-14	493
RPL23	0.37	mycn_status: 1 >= 0	3.67e-14	493
MRPL15	0.338	mycn_status: 1 >= 0	3.71e-14	493
WDR12	0.361	mycn_status: 1 >= 0	3.89e-14	493
RPL12	0.363	mycn_status: 1 >= 0	5.48e-14	493
RPS20	0.348	mycn_status: 1 >= 0	5.58e-14	493
DDX60	-0.381	mycn_status: 1 < 0	7.38e-14	493
NONO DNA repair	0.337	mycn_status: 1 >= 0	7.44e-14	493
TERT	0.312	mycn_status: 1 >= 0	8.08e-14	493
ADARB1	-0.355	mycn_status: 1 < 0	8.65e-14	493
MBNL2	-0.396	mycn_status: 1 < 0	9.01e-14	493
ELAVL3 development,differentiation	-0.353	mycn_status: 1 < 0	1.07e-13	493
RBM5 cell cycle	-0.341	mycn_status: 1 < 0	1.17e-13	493
MIF4GD	-0.327	mycn_status: 1 < 0	1.24e-13	493
PAN2	-0.323	mycn_status: 1 < 0	1.43e-13	493
UBA52	0.343	mycn_status: 1 >= 0	1.73e-13	493
MRPL52	0.323	mycn_status: 1 >= 0	1.75e-13	493
RPL7A	0.345	mycn_status: 1 >= 0	1.88e-13	493
IFIT2	-0.358	mycn_status: 1 < 0	1.88e-13	493
SNRPD3	0.332	mycn_status: 1 >= 0	1.88e-13	493
TFB1M	-0.347	mycn_status: 1 < 0	2.03e-13	493
CAPRIN2	-0.36	mycn_status: 1 < 0	2.54e-13	493
ERN1 apoptosis,kinase	-0.329	mycn_status: 1 < 0	3.48e-13	493
MVP	-0.368	mycn_status: 1 < 0	3.67e-13	493
PURB apoptosis,differentiation	-0.354	mycn_status: 1 < 0	4.08e-13	493
CWC25	-0.357	mycn_status: 1 < 0	4.14e-13	493
EIF2S3	0.35	mycn_status: 1 >= 0	4.24e-13	493
ERAL1	-0.286	mycn_status: 1 < 0	4.74e-13	493
ZC3H12D	-0.354	mycn_status: 1 < 0	4.76e-13	493
SF3A3	-0.337	mycn_status: 1 < 0	5.08e-13	493
EIF4A1	0.326	mycn_status: 1 >= 0	5.22e-13	493
DDX17	-0.333	mycn_status: 1 < 0	5.43e-13	493
RRP36	-0.347	mycn_status: 1 < 0	5.52e-13	493
DDX60L	-0.35	mycn_status: 1 < 0	5.66e-13	493
IPO8 signal transduction	-0.369	mycn_status: 1 < 0	5.71e-13	493
CRYZ drug target	-0.372	mycn_status: 1 < 0	5.83e-13	493
EXOSC7	0.328	mycn_status: 1 >= 0	6.12e-13	493
THOC6	0.304	mycn_status: 1 >= 0	7.17e-13	493
PTRH2 apoptosis	0.331	mycn_status: 1 >= 0	7.28e-13	493
ENDOV	-0.347	mycn_status: 1 < 0	7.43e-13	493
DRG2 signal transduction	-0.285	mycn_status: 1 < 0	8.31e-13	493
CASC3	-0.327	mycn_status: 1 < 0	9.5e-13	493
MRPS12	0.317	mycn_status: 1 >= 0	9.79e-13	493
TRIM21	-0.323	mycn_status: 1 < 0	9.87e-13	493
SLC4A1AP	-0.356	mycn_status: 1 < 0	1.09e-12	493
PAN3	-0.336	mycn_status: 1 < 0	1.12e-12	493
CCDC86	0.315	mycn_status: 1 >= 0	1.15e-12	493
RBMS1	-0.343	mycn_status: 1 < 0	1.22e-12	493
QKI development,differentiation	-0.35	mycn_status: 1 < 0	1.23e-12	493
RNASE4	-0.348	mycn_status: 1 < 0	1.24e-12	493
NOP58	0.328	mycn_status: 1 >= 0	1.56e-12	493
RP9	-0.332	mycn_status: 1 < 0	1.89e-12	493
EIF3B	0.328	mycn_status: 1 >= 0	1.91e-12	493
ZCCHC9	-0.345	mycn_status: 1 < 0	1.94e-12	493
EIF4E3	-0.32	mycn_status: 1 < 0	2.23e-12	493
NUDT16L1	-0.337	mycn_status: 1 < 0	2.39e-12	493
RC3H1	-0.336	mycn_status: 1 < 0	2.51e-12	493
RPP40	0.33	mycn_status: 1 >= 0	2.53e-12	493
PTBP2	-0.349	mycn_status: 1 < 0	2.84e-12	493
TEFM	-0.344	mycn_status: 1 < 0	2.85e-12	493
RPL38	0.342	mycn_status: 1 >= 0	3.05e-12	493
EEF1G	0.327	mycn_status: 1 >= 0	3.34e-12	493
KRR1	-0.351	mycn_status: 1 < 0	3.65e-12	493
DDX54 signal transduction	0.326	mycn_status: 1 >= 0	3.68e-12	493
SMAD2 development,differentiation	-0.323	mycn_status: 1 < 0	4.03e-12	493
ZRANB2 transcription factor	-0.375	mycn_status: 1 < 0	4.04e-12	493
RPLP0	0.308	mycn_status: 1 >= 0	4.05e-12	493
DIS3	-0.332	mycn_status: 1 < 0	4.43e-12	493
N4BP1	-0.323	mycn_status: 1 < 0	4.61e-12	493
SAMHD1	-0.323	mycn_status: 1 < 0	5.02e-12	493
RPL34	0.338	mycn_status: 1 >= 0	5.2e-12	493
DDX1 development	0.577	mycn_status: 1 >= 0	5.45e-12	493
EIF4G2 differentiation	-0.358	mycn_status: 1 < 0	5.94e-12	493
MRTO4	-0.331	mycn_status: 1 < 0	6.77e-12	493
DHX37	0.313	mycn_status: 1 >= 0	7.35e-12	493
APOBEC3F	-0.359	mycn_status: 1 < 0	8.75e-12	493
RPLP2	0.331	mycn_status: 1 >= 0	9.74e-12	493
EIF3M	0.312	mycn_status: 1 >= 0	1.03e-11	493
ENOX1	-0.348	mycn_status: 1 < 0	1.07e-11	493
HNRNPD	0.318	mycn_status: 1 >= 0	1.1e-11	493
MRPS27	0.333	mycn_status: 1 >= 0	1.25e-11	493
ALYREF	0.286	mycn_status: 1 >= 0	1.46e-11	493
RBM15B	0.312	mycn_status: 1 >= 0	1.55e-11	493
HNRNPAB	0.259	mycn_status: 1 >= 0	1.65e-11	493
CDC5L cell cycle	-0.33	mycn_status: 1 < 0	1.92e-11	493
RPS15A	0.328	mycn_status: 1 >= 0	2.01e-11	493
CDC40	-0.282	mycn_status: 1 < 0	2.19e-11	493
AFF1 transcription factor	-0.341	mycn_status: 1 < 0	2.25e-11	493
ABCE1	0.303	mycn_status: 1 >= 0	2.28e-11	493
RPL15	0.328	mycn_status: 1 >= 0	2.46e-11	493
RBM43	-0.312	mycn_status: 1 < 0	2.46e-11	493
SIDT2 membrane	-0.3	mycn_status: 1 < 0	2.79e-11	493
CLK3 kinase	-0.307	mycn_status: 1 < 0	3.42e-11	493
EIF4ENIF1	-0.295	mycn_status: 1 < 0	3.7e-11	493
INTS1 membrane	-0.285	mycn_status: 1 < 0	3.94e-11	493
RUVBL2 DNA repair	0.257	mycn_status: 1 >= 0	4.02e-11	493
CPSF4	-0.308	mycn_status: 1 < 0	4.08e-11	493
AFF4 transcription factor	-0.333	mycn_status: 1 < 0	4.11e-11	493
UNKL	-0.314	mycn_status: 1 < 0	4.24e-11	493
ADAR	-0.331	mycn_status: 1 < 0	4.45e-11	493
DUS3L	0.288	mycn_status: 1 >= 0	4.87e-11	493
TLR3 membrane,signal transduction	-0.337	mycn_status: 1 < 0	5.12e-11	493
GRWD1	0.293	mycn_status: 1 >= 0	5.36e-11	493
TARSL2	-0.334	mycn_status: 1 < 0	5.52e-11	493
C1D	-0.326	mycn_status: 1 < 0	5.52e-11	493
GAPDH drug target	0.243	mycn_status: 1 >= 0	5.66e-11	493
GPATCH8	-0.325	mycn_status: 1 < 0	5.66e-11	493
TAF9 kinase	-0.317	mycn_status: 1 < 0	5.66e-11	493
PAIP2	-0.333	mycn_status: 1 < 0	5.94e-11	493
RARS2	-0.309	mycn_status: 1 < 0	5.97e-11	493
MSL3	-0.315	mycn_status: 1 < 0	6.21e-11	493
CCNT2 cell cycle	-0.323	mycn_status: 1 < 0	6.21e-11	493
C11orf68	-0.301	mycn_status: 1 < 0	6.6e-11	493
PIN4	-0.359	mycn_status: 1 < 0	6.92e-11	493
GTPBP1 signal transduction	0.329	mycn_status: 1 >= 0	7.24e-11	493
TYW5	-0.303	mycn_status: 1 < 0	7.51e-11	493
TARBP2	-0.259	mycn_status: 1 < 0	7.61e-11	493
MAZ	0.277	mycn_status: 1 >= 0	7.76e-11	493
MBNL1 development,differentiation	-0.31	mycn_status: 1 < 0	7.85e-11	493
SWT1	-0.339	mycn_status: 1 < 0	8e-11	493
UTP11L apoptosis,development	-0.309	mycn_status: 1 < 0	8.32e-11	493
RSL1D1	0.302	mycn_status: 1 >= 0	8.63e-11	493
LARP4	-0.294	mycn_status: 1 < 0	9.14e-11	493
HNRNPA1	0.309	mycn_status: 1 >= 0	9.17e-11	493
UTP6	-0.308	mycn_status: 1 < 0	9.59e-11	493
EEF2K kinase	0.294	mycn_status: 1 >= 0	9.8e-11	493
SAMD4A	-0.326	mycn_status: 1 < 0	1.05e-10	493
RPS6	0.321	mycn_status: 1 >= 0	1.05e-10	493
SAP18	-0.312	mycn_status: 1 < 0	1.05e-10	493
INTS8	-0.307	mycn_status: 1 < 0	1.18e-10	493
R3HCC1L	-0.321	mycn_status: 1 < 0	1.23e-10	493
RPL14	0.281	mycn_status: 1 >= 0	1.3e-10	493
CD3EAP signal transduction	0.295	mycn_status: 1 >= 0	1.3e-10	493
SRRM4	-0.282	mycn_status: 1 < 0	1.53e-10	493
PRDX1 development	-0.322	mycn_status: 1 < 0	1.54e-10	493
FXR2	-0.315	mycn_status: 1 < 0	1.54e-10	493
RQCD1	-0.312	mycn_status: 1 < 0	1.54e-10	493
PES1	0.308	mycn_status: 1 >= 0	1.76e-10	493
DDX5	-0.321	mycn_status: 1 < 0	1.77e-10	493
ZFP36 signal transduction	-0.323	mycn_status: 1 < 0	2e-10	493
SMAD3 development,membrane	0.319	mycn_status: 1 >= 0	2.57e-10	493
R3HCC1	-0.311	mycn_status: 1 < 0	2.64e-10	493
CRNKL1	-0.325	mycn_status: 1 < 0	3.08e-10	493
RPS27 signal transduction	0.289	mycn_status: 1 >= 0	3.13e-10	493
SRSF3	0.286	mycn_status: 1 >= 0	3.39e-10	493
EIF3H	0.282	mycn_status: 1 >= 0	3.4e-10	493
HNRNPH2	-0.328	mycn_status: 1 < 0	3.6e-10	493
PTRHD1	0.291	mycn_status: 1 >= 0	3.6e-10	493
KIAA0430	-0.298	mycn_status: 1 < 0	3.76e-10	493
RBM18	-0.32	mycn_status: 1 < 0	3.81e-10	493
EIF3E	0.286	mycn_status: 1 >= 0	3.81e-10	493
TIA1 apoptosis	-0.299	mycn_status: 1 < 0	4.28e-10	493
LRPPRC	0.305	mycn_status: 1 >= 0	4.38e-10	493
POLR1E	0.261	mycn_status: 1 >= 0	4.4e-10	493
ATXN2 differentiation	-0.324	mycn_status: 1 < 0	4.87e-10	493
ZNFX1 transcription factor	-0.298	mycn_status: 1 < 0	5.11e-10	493
RPS14	0.239	mycn_status: 1 >= 0	5.51e-10	493
NXF3	-0.308	mycn_status: 1 < 0	5.72e-10	493
U2AF1L4	-0.305	mycn_status: 1 < 0	6.57e-10	493
ZNF385A	-0.306	mycn_status: 1 < 0	7.36e-10	493
ENDOU	-0.284	mycn_status: 1 < 0	8.37e-10	493
BICC1 development	-0.301	mycn_status: 1 < 0	8.42e-10	493
TARBP1	-0.278	mycn_status: 1 < 0	8.67e-10	493
LSM11	0.288	mycn_status: 1 >= 0	8.79e-10	493
SF3A1	-0.27	mycn_status: 1 < 0	9.26e-10	493
AEN	0.276	mycn_status: 1 >= 0	9.76e-10	493
EIF3I	-0.283	mycn_status: 1 < 0	1.21e-09	493
POP7	0.272	mycn_status: 1 >= 0	1.45e-09	493
ENDOG	0.251	mycn_status: 1 >= 0	1.45e-09	493
CCDC59	0.257	mycn_status: 1 >= 0	1.81e-09	493
CNOT8 transcription factor	-0.288	mycn_status: 1 < 0	2.17e-09	493
PIWIL4 development	-0.274	mycn_status: 1 < 0	2.3e-09	493
PSMA6	0.235	mycn_status: 1 >= 0	2.53e-09	493
AGFG1	-0.308	mycn_status: 1 < 0	2.54e-09	493
SUGP2	-0.285	mycn_status: 1 < 0	2.56e-09	493
HEATR1	0.285	mycn_status: 1 >= 0	2.63e-09	493
LUC7L3	-0.3	mycn_status: 1 < 0	2.76e-09	493
SLTM	-0.301	mycn_status: 1 < 0	2.78e-09	493
ANG development,differentiation	-0.278	mycn_status: 1 < 0	2.79e-09	493
ADAD2	-0.248	mycn_status: 1 < 0	2.9e-09	493
RPL10A	0.297	mycn_status: 1 >= 0	3.02e-09	493
NSUN4	-0.253	mycn_status: 1 < 0	3.04e-09	493
MRPL20	-0.282	mycn_status: 1 < 0	3.16e-09	493
FRG1	0.264	mycn_status: 1 >= 0	3.52e-09	493
DAZAP1 development,differentiation	0.229	mycn_status: 1 >= 0	3.55e-09	493
TRMT10B	-0.283	mycn_status: 1 < 0	3.59e-09	493
PRIM1	0.247	mycn_status: 1 >= 0	3.7e-09	493
TRMT10C	0.218	mycn_status: 1 >= 0	3.9e-09	493
PUS1	0.305	mycn_status: 1 >= 0	4.08e-09	493
HNRNPA3	0.277	mycn_status: 1 >= 0	4.11e-09	493
RPL4	0.272	mycn_status: 1 >= 0	4.12e-09	493
GNL2	-0.283	mycn_status: 1 < 0	4.16e-09	493
MTERFD2	-0.26	mycn_status: 1 < 0	4.27e-09	493
CD2BP2	-0.283	mycn_status: 1 < 0	4.51e-09	493
NAT10	0.274	mycn_status: 1 >= 0	5.26e-09	493
MRPS15	-0.273	mycn_status: 1 < 0	5.74e-09	493
RBM24	-0.296	mycn_status: 1 < 0	5.77e-09	493
POLR2A	-0.268	mycn_status: 1 < 0	6.08e-09	493
PIWIL2 development,differentiation	-0.214	mycn_status: 1 < 0	6.13e-09	493
THOC3	0.28	mycn_status: 1 >= 0	6.15e-09	493
TRMT112	0.233	mycn_status: 1 >= 0	6.23e-09	493
RTCA	-0.253	mycn_status: 1 < 0	6.76e-09	493
MAEL	-0.284	mycn_status: 1 < 0	6.8e-09	493
PCBP3	-0.288	mycn_status: 1 < 0	6.8e-09	493
MEX3A	0.267	mycn_status: 1 >= 0	6.82e-09	493
YRDC	-0.249	mycn_status: 1 < 0	7.1e-09	493
MOV10L1 development,differentiation	-0.294	mycn_status: 1 < 0	7.71e-09	493
HNRNPCL1	0.206	mycn_status: 1 >= 0	7.92e-09	493
AARS drug target	-0.276	mycn_status: 1 < 0	8.37e-09	493
RPL13A	0.252	mycn_status: 1 >= 0	8.65e-09	493
CLK4 kinase	-0.281	mycn_status: 1 < 0	9.86e-09	493
ZCCHC14	-0.261	mycn_status: 1 < 0	1.07e-08	493
SNRPB	0.235	mycn_status: 1 >= 0	1.16e-08	493
MAGOHB	0.245	mycn_status: 1 >= 0	1.16e-08	493
EIF4H	-0.28	mycn_status: 1 < 0	1.17e-08	493
DNAAF2	0.236	mycn_status: 1 >= 0	1.29e-08	493
PIH1D2	-0.269	mycn_status: 1 < 0	1.31e-08	493
HINT3	-0.277	mycn_status: 1 < 0	1.31e-08	493
RPF1	-0.296	mycn_status: 1 < 0	1.33e-08	493
RANBP6	-0.306	mycn_status: 1 < 0	1.34e-08	493
POLR2I	0.238	mycn_status: 1 >= 0	1.41e-08	493
INTS3	-0.293	mycn_status: 1 < 0	1.51e-08	493
EXOSC3	0.252	mycn_status: 1 >= 0	1.64e-08	493
MRPL30	0.249	mycn_status: 1 >= 0	1.65e-08	493
TDRD6	-0.286	mycn_status: 1 < 0	1.66e-08	493
TNRC6B	-0.253	mycn_status: 1 < 0	1.75e-08	493
NUFIP1	-0.244	mycn_status: 1 < 0	2.02e-08	493
RPL27A	0.228	mycn_status: 1 >= 0	2.15e-08	493
DNAJC17	-0.28	mycn_status: 1 < 0	2.3e-08	493
RPP25L	0.239	mycn_status: 1 >= 0	2.39e-08	493
KAT8	-0.277	mycn_status: 1 < 0	2.54e-08	493
TRMT1L	-0.298	mycn_status: 1 < 0	2.57e-08	493
EBNA1BP2	-0.205	mycn_status: 1 < 0	2.69e-08	493
PRPF4B kinase	-0.263	mycn_status: 1 < 0	2.79e-08	493
DCP2	-0.284	mycn_status: 1 < 0	2.82e-08	493
R3HDM1	-0.268	mycn_status: 1 < 0	2.83e-08	493
UTP3	0.241	mycn_status: 1 >= 0	3.01e-08	493
TFIP11 development,differentiation	-0.274	mycn_status: 1 < 0	3.04e-08	493
GUF1 signal transduction	0.232	mycn_status: 1 >= 0	3.04e-08	493
LSM3	0.259	mycn_status: 1 >= 0	3.06e-08	493
RRS1	0.222	mycn_status: 1 >= 0	3.14e-08	493
RBMXL2	-0.254	mycn_status: 1 < 0	3.36e-08	493
RBMY1A1	-0.263	mycn_status: 1 < 0	3.47e-08	493
POLR2F	0.246	mycn_status: 1 >= 0	3.54e-08	493
DHX8	-0.236	mycn_status: 1 < 0	3.55e-08	493
MRPL4	0.235	mycn_status: 1 >= 0	3.59e-08	493
SUPT5H cell cycle	-0.248	mycn_status: 1 < 0	3.69e-08	493
CCRN4L transcription factor	0.228	mycn_status: 1 >= 0	3.71e-08	493
DDX58	-0.268	mycn_status: 1 < 0	3.87e-08	493
FARSB drug target	0.207	mycn_status: 1 >= 0	3.93e-08	493
TNPO3	-0.281	mycn_status: 1 < 0	3.97e-08	493
AIMP2	0.254	mycn_status: 1 >= 0	3.99e-08	493
EXOSC4	0.21	mycn_status: 1 >= 0	4.25e-08	493
MECP2	-0.275	mycn_status: 1 < 0	4.28e-08	493
NYNRIN	-0.254	mycn_status: 1 < 0	4.31e-08	493
AIMP1	0.249	mycn_status: 1 >= 0	4.53e-08	493
RPL23A	0.271	mycn_status: 1 >= 0	5.34e-08	493
PARN	-0.237	mycn_status: 1 < 0	5.5e-08	493
CXorf23	-0.306	mycn_status: 1 < 0	5.6e-08	493
DQX1	-0.26	mycn_status: 1 < 0	5.61e-08	493
DDX56	-0.272	mycn_status: 1 < 0	5.72e-08	493
PUS7L	0.236	mycn_status: 1 >= 0	6.04e-08	493
SART3	-0.269	mycn_status: 1 < 0	6.21e-08	493
WDR3	0.247	mycn_status: 1 >= 0	6.62e-08	493
NUPL2	-0.284	mycn_status: 1 < 0	6.75e-08	493
SNRPG	0.226	mycn_status: 1 >= 0	6.81e-08	493
KHNYN	-0.236	mycn_status: 1 < 0	6.98e-08	493
NOP14	0.234	mycn_status: 1 >= 0	7.15e-08	493
PABPC1L	-0.239	mycn_status: 1 < 0	7.4e-08	493
PARS2 drug target	-0.257	mycn_status: 1 < 0	7.63e-08	493
SUZ12	-0.284	mycn_status: 1 < 0	7.76e-08	493
EXOSC6	-0.248	mycn_status: 1 < 0	8.19e-08	493
RPS2	0.159	mycn_status: 1 >= 0	8.62e-08	493
RNF17 differentiation	-0.236	mycn_status: 1 < 0	9.25e-08	493
EIF5A2	0.25	mycn_status: 1 >= 0	9.27e-08	493
FBXO17	-0.239	mycn_status: 1 < 0	9.29e-08	493
UTP14C cell cycle,development	-0.261	mycn_status: 1 < 0	9.87e-08	493
RBPMS2	-0.25	mycn_status: 1 < 0	1.02e-07	493
HELZ	-0.288	mycn_status: 1 < 0	1.02e-07	493
MTRF1L	-0.279	mycn_status: 1 < 0	1.03e-07	493
MARS	-0.27	mycn_status: 1 < 0	1.05e-07	493
SRPR membrane	-0.241	mycn_status: 1 < 0	1.06e-07	493
RBFOX2	-0.264	mycn_status: 1 < 0	1.22e-07	493
DHX29	-0.283	mycn_status: 1 < 0	1.39e-07	493
DAZL development,differentiation	-0.179	mycn_status: 1 < 0	1.62e-07	493
MRPS34	0.252	mycn_status: 1 >= 0	1.74e-07	493
PRPF40B	-0.243	mycn_status: 1 < 0	1.74e-07	493
MRPL51	0.22	mycn_status: 1 >= 0	1.9e-07	493
MRPL12	0.222	mycn_status: 1 >= 0	1.91e-07	493
FARSA drug target	0.192	mycn_status: 1 >= 0	2.12e-07	493
NXT1	0.248	mycn_status: 1 >= 0	2.14e-07	493
FAU	0.237	mycn_status: 1 >= 0	2.33e-07	493
DYNLL1	-0.261	mycn_status: 1 < 0	2.42e-07	493
NOVA1	-0.253	mycn_status: 1 < 0	2.68e-07	493
DDX43	-0.232	mycn_status: 1 < 0	2.68e-07	493
RPL7	0.24	mycn_status: 1 >= 0	2.69e-07	493
TRMT44	-0.247	mycn_status: 1 < 0	2.76e-07	493
BOLL cell cycle,development	-0.234	mycn_status: 1 < 0	2.79e-07	493
GSPT2 cell cycle	-0.248	mycn_status: 1 < 0	2.8e-07	493
GFM1	-0.265	mycn_status: 1 < 0	2.86e-07	493
YTHDF3	-0.26	mycn_status: 1 < 0	2.94e-07	493
ZFR	-0.278	mycn_status: 1 < 0	2.97e-07	493
SLIRP	0.229	mycn_status: 1 >= 0	2.97e-07	493
GATC	-0.266	mycn_status: 1 < 0	3e-07	493
FAM46A	-0.252	mycn_status: 1 < 0	3e-07	493
CWF19L2	-0.249	mycn_status: 1 < 0	3e-07	493
TRDMT1	-0.27	mycn_status: 1 < 0	3.01e-07	493
RPL3	0.244	mycn_status: 1 >= 0	3.01e-07	493
OAS3	-0.25	mycn_status: 1 < 0	3.06e-07	493
PABPC1	0.229	mycn_status: 1 >= 0	3.22e-07	493
MRPL45	0.25	mycn_status: 1 >= 0	3.35e-07	493
TIPARP	-0.253	mycn_status: 1 < 0	3.37e-07	493
PAPD5 cell cycle	-0.261	mycn_status: 1 < 0	3.45e-07	493
ZRSR2	-0.237	mycn_status: 1 < 0	3.47e-07	493
CNBP transcription factor	0.223	mycn_status: 1 >= 0	3.67e-07	493
BZW1	-0.279	mycn_status: 1 < 0	3.89e-07	493
PAPOLB	-0.246	mycn_status: 1 < 0	3.92e-07	493
RC3H2 membrane	-0.262	mycn_status: 1 < 0	4.01e-07	493
TSR2	-0.261	mycn_status: 1 < 0	4.07e-07	493
PDCD11 apoptosis,signal transduction	0.224	mycn_status: 1 >= 0	4.15e-07	493
PUSL1	-0.212	mycn_status: 1 < 0	4.21e-07	493
TDRD5	-0.198	mycn_status: 1 < 0	4.69e-07	493
ZC3H3	-0.26	mycn_status: 1 < 0	4.72e-07	493
RBM45	-0.249	mycn_status: 1 < 0	4.73e-07	493
SND1	-0.248	mycn_status: 1 < 0	5.06e-07	493
RRP8	-0.23	mycn_status: 1 < 0	5.28e-07	493
PQBP1	0.218	mycn_status: 1 >= 0	5.36e-07	493
SMG7	-0.255	mycn_status: 1 < 0	5.51e-07	493
RSL24D1	0.236	mycn_status: 1 >= 0	5.54e-07	493
PIWIL1 development,differentiation	-0.217	mycn_status: 1 < 0	5.63e-07	493
ELAVL1 development	0.225	mycn_status: 1 >= 0	5.66e-07	493
RBM22	-0.254	mycn_status: 1 < 0	6.28e-07	493
RRBP1 membrane,signal transduction	-0.263	mycn_status: 1 < 0	6.42e-07	493
RNGTT	-0.252	mycn_status: 1 < 0	6.57e-07	493
PDCD7 apoptosis	-0.189	mycn_status: 1 < 0	6.59e-07	493
ZCCHC2	-0.248	mycn_status: 1 < 0	6.86e-07	493
TDRKH membrane	-0.233	mycn_status: 1 < 0	6.87e-07	493
SCAF11	-0.259	mycn_status: 1 < 0	6.94e-07	493
RBM42	-0.239	mycn_status: 1 < 0	7.19e-07	493
MRPL33	0.246	mycn_status: 1 >= 0	7.48e-07	493
RBM3	0.217	mycn_status: 1 >= 0	7.98e-07	493
FTSJ1	0.169	mycn_status: 1 >= 0	7.99e-07	493
SIDT1 membrane	-0.245	mycn_status: 1 < 0	8.06e-07	493
NCBP1	0.21	mycn_status: 1 >= 0	8.65e-07	493
ZNF346 apoptosis	-0.233	mycn_status: 1 < 0	8.83e-07	493
ERN2 apoptosis,kinase	-0.235	mycn_status: 1 < 0	9.68e-07	493
TARDBP cell cycle,transcription factor	-0.222	mycn_status: 1 < 0	9.73e-07	493
SETD1B	-0.225	mycn_status: 1 < 0	9.75e-07	493
PCBP2	0.184	mycn_status: 1 >= 0	9.99e-07	493
ICT1	0.204	mycn_status: 1 >= 0	1.01e-06	493
RNMT	-0.237	mycn_status: 1 < 0	1.01e-06	493
BRCA1 DNA repair,apoptosis	0.213	mycn_status: 1 >= 0	1.02e-06	493
XPOT	0.224	mycn_status: 1 >= 0	1.03e-06	493
MRPS30 apoptosis	0.198	mycn_status: 1 >= 0	1.1e-06	493
DDX6	-0.195	mycn_status: 1 < 0	1.1e-06	493
NOM1	-0.226	mycn_status: 1 < 0	1.12e-06	493
SEPSECS drug target	-0.23	mycn_status: 1 < 0	1.12e-06	493
RNASE11	-0.222	mycn_status: 1 < 0	1.15e-06	493
EIF2B3 development,differentiation	-0.232	mycn_status: 1 < 0	1.22e-06	493
MRPS18B	-0.229	mycn_status: 1 < 0	1.31e-06	493
SCAF8	-0.242	mycn_status: 1 < 0	1.35e-06	493
RTF1	-0.181	mycn_status: 1 < 0	1.42e-06	493
RNASET2	-0.23	mycn_status: 1 < 0	1.49e-06	493
TUT1	0.208	mycn_status: 1 >= 0	1.51e-06	493
PAPD4	-0.258	mycn_status: 1 < 0	1.56e-06	493
LSM6	0.236	mycn_status: 1 >= 0	1.58e-06	493
ZC3HAV1L	-0.192	mycn_status: 1 < 0	1.6e-06	493
GNL3L	0.207	mycn_status: 1 >= 0	1.62e-06	493
MRPS24	0.232	mycn_status: 1 >= 0	1.66e-06	493
TSR1	-0.233	mycn_status: 1 < 0	1.72e-06	493
ELAC1	-0.23	mycn_status: 1 < 0	1.81e-06	493
FAM103A1	-0.253	mycn_status: 1 < 0	1.82e-06	493
PARP1 DNA repair,membrane	0.237	mycn_status: 1 >= 0	1.82e-06	493
DDX21	0.194	mycn_status: 1 >= 0	1.87e-06	493
DENR	-0.181	mycn_status: 1 < 0	1.96e-06	493
TSR3	-0.233	mycn_status: 1 < 0	2.04e-06	493
RBFOX3	0.254	mycn_status: 1 >= 0	2.11e-06	493
PDCD4 apoptosis,cell cycle	-0.251	mycn_status: 1 < 0	2.12e-06	493
CNOT2	-0.167	mycn_status: 1 < 0	2.13e-06	493
ZCCHC8	-0.182	mycn_status: 1 < 0	2.18e-06	493
CARS drug target	-0.256	mycn_status: 1 < 0	2.21e-06	493
RPS10	0.207	mycn_status: 1 >= 0	2.26e-06	493
FTSJ2	-0.228	mycn_status: 1 < 0	2.27e-06	493
SMAD4 development,signal transduction	-0.248	mycn_status: 1 < 0	2.47e-06	493
PHAX	-0.248	mycn_status: 1 < 0	2.53e-06	493
RPS19BP1	-0.226	mycn_status: 1 < 0	2.59e-06	493
ZC3H7A	-0.237	mycn_status: 1 < 0	2.63e-06	493
WDR43	0.217	mycn_status: 1 >= 0	2.77e-06	493
TRNT1	0.21	mycn_status: 1 >= 0	2.82e-06	493
MRPL36	0.202	mycn_status: 1 >= 0	2.86e-06	493
ANGEL1	-0.215	mycn_status: 1 < 0	3.01e-06	493
EIF2S1	0.128	mycn_status: 1 >= 0	3.08e-06	493
EIF4E	0.194	mycn_status: 1 >= 0	3.19e-06	493
TST	0.147	mycn_status: 1 >= 0	3.21e-06	493
EIF2B1 development,differentiation	-0.21	mycn_status: 1 < 0	3.22e-06	493
FCF1	-0.22	mycn_status: 1 < 0	3.32e-06	493
LENG9	-0.221	mycn_status: 1 < 0	3.37e-06	493
RPL31	0.22	mycn_status: 1 >= 0	3.42e-06	493
MRPL14	0.207	mycn_status: 1 >= 0	3.42e-06	493
RPL39L	0.156	mycn_status: 1 >= 0	3.57e-06	493
CPSF3	0.196	mycn_status: 1 >= 0	3.64e-06	493
THUMPD1	-0.257	mycn_status: 1 < 0	3.89e-06	493
HNRNPL	0.164	mycn_status: 1 >= 0	3.91e-06	493
DDX4 development	-0.197	mycn_status: 1 < 0	4.57e-06	493
API5 apoptosis	-0.254	mycn_status: 1 < 0	4.59e-06	493
RBPMS	-0.228	mycn_status: 1 < 0	4.59e-06	493
PTRF membrane	-0.248	mycn_status: 1 < 0	4.65e-06	493
PABPC4	-0.225	mycn_status: 1 < 0	4.66e-06	493
RPS9	0.237	mycn_status: 1 >= 0	4.89e-06	493
NSRP1	-0.23	mycn_status: 1 < 0	4.91e-06	493
AFF3 development	-0.22	mycn_status: 1 < 0	4.91e-06	493
HNRNPR	-0.192	mycn_status: 1 < 0	4.92e-06	493
EIF2AK2 apoptosis,cell cycle	-0.231	mycn_status: 1 < 0	4.92e-06	493
MRPL1	0.173	mycn_status: 1 >= 0	4.98e-06	493
YARS2 drug target	0.176	mycn_status: 1 >= 0	4.99e-06	493
SRSF1	0.209	mycn_status: 1 >= 0	5.05e-06	493
MRPL16	0.215	mycn_status: 1 >= 0	5.6e-06	493
MRPS17 membrane	0.216	mycn_status: 1 >= 0	5.67e-06	493
METTL2A	-0.201	mycn_status: 1 < 0	5.69e-06	493
LSM14B	-0.207	mycn_status: 1 < 0	5.95e-06	493
DAZ2	-0.138	mycn_status: 1 < 0	6.02e-06	493
CWC22	-0.234	mycn_status: 1 < 0	6.15e-06	493
PIH1D1	0.166	mycn_status: 1 >= 0	6.16e-06	493
ADAD1	-0.228	mycn_status: 1 < 0	6.58e-06	493
ATXN1L	-0.2	mycn_status: 1 < 0	6.96e-06	493
IGF2BP1	0.141	mycn_status: 1 >= 0	7.23e-06	493
ZMAT5	-0.234	mycn_status: 1 < 0	8.01e-06	493
XPO7	-0.216	mycn_status: 1 < 0	8.17e-06	493
KARS drug target	0.149	mycn_status: 1 >= 0	8.17e-06	493
REXO2	0.208	mycn_status: 1 >= 0	8.54e-06	493
GTPBP10	-0.212	mycn_status: 1 < 0	8.62e-06	493
OASL	-0.231	mycn_status: 1 < 0	8.81e-06	493
ACO1	-0.213	mycn_status: 1 < 0	8.87e-06	493
SF3A2	-0.208	mycn_status: 1 < 0	9.45e-06	493
RPP25	-0.248	mycn_status: 1 < 0	9.54e-06	493
SNRNP70	-0.17	mycn_status: 1 < 0	9.6e-06	493
FYTTD1	-0.241	mycn_status: 1 < 0	1.01e-05	493
ISG20	-0.218	mycn_status: 1 < 0	1.05e-05	493
ESRP1	-0.236	mycn_status: 1 < 0	1.06e-05	493
EIF3D	0.223	mycn_status: 1 >= 0	1.09e-05	493
FIP1L1	0.158	mycn_status: 1 >= 0	1.14e-05	493
ISG20L2	-0.212	mycn_status: 1 < 0	1.15e-05	493
TNRC6C	-0.204	mycn_status: 1 < 0	1.18e-05	493
TRUB1	-0.24	mycn_status: 1 < 0	1.22e-05	493
GPATCH4	0.189	mycn_status: 1 >= 0	1.26e-05	493
DZIP3	-0.226	mycn_status: 1 < 0	1.29e-05	493
LUZP4	-0.225	mycn_status: 1 < 0	1.32e-05	493
UBAP2L	-0.193	mycn_status: 1 < 0	1.33e-05	493
RPL21	0.209	mycn_status: 1 >= 0	1.35e-05	493
CNOT10	0.204	mycn_status: 1 >= 0	1.38e-05	493
NSUN7	0.198	mycn_status: 1 >= 0	1.44e-05	493
TBL3 signal transduction	0.154	mycn_status: 1 >= 0	1.52e-05	493
NOL8	0.144	mycn_status: 1 >= 0	1.58e-05	493
FAM120C	0.205	mycn_status: 1 >= 0	1.58e-05	493
LRRFIP1	-0.212	mycn_status: 1 < 0	1.58e-05	493
QTRTD1	0.206	mycn_status: 1 >= 0	1.59e-05	493
ILF2	0.174	mycn_status: 1 >= 0	1.6e-05	493
RBMS2	-0.208	mycn_status: 1 < 0	1.6e-05	493
CELF3	-0.191	mycn_status: 1 < 0	1.67e-05	493
RBM8A	0.219	mycn_status: 1 >= 0	1.68e-05	493
POLR2G	-0.207	mycn_status: 1 < 0	1.8e-05	493
NUTF2	0.116	mycn_status: 1 >= 0	1.81e-05	493
NARS2 drug target	0.196	mycn_status: 1 >= 0	1.86e-05	493
RBMY1E	-0.19	mycn_status: 1 < 0	1.95e-05	493
PRPF8	-0.173	mycn_status: 1 < 0	1.96e-05	493
MTG1	-0.225	mycn_status: 1 < 0	2.02e-05	493
ASCC1	-0.214	mycn_status: 1 < 0	2.21e-05	493
EDC4	-0.23	mycn_status: 1 < 0	2.22e-05	493
DHX33	0.193	mycn_status: 1 >= 0	2.24e-05	493
ESRP2	-0.188	mycn_status: 1 < 0	2.29e-05	493
DGCR14 development	-0.204	mycn_status: 1 < 0	2.32e-05	493
POLR2J	-0.207	mycn_status: 1 < 0	2.36e-05	493
XRN1 cell cycle	-0.222	mycn_status: 1 < 0	2.38e-05	493
TARS2 drug target	-0.211	mycn_status: 1 < 0	2.4e-05	493
RNASE3 drug target	-0.213	mycn_status: 1 < 0	2.41e-05	493
RBM23	-0.213	mycn_status: 1 < 0	2.46e-05	493
TROVE2	-0.213	mycn_status: 1 < 0	2.61e-05	493
IFIT3	-0.203	mycn_status: 1 < 0	2.8e-05	493
RRP7A	-0.199	mycn_status: 1 < 0	2.8e-05	493
MRPL49	-0.192	mycn_status: 1 < 0	2.81e-05	493
RNH1 development	-0.188	mycn_status: 1 < 0	2.94e-05	493
HNRNPUL1	0.182	mycn_status: 1 >= 0	3.03e-05	493
MRPS9	0.212	mycn_status: 1 >= 0	3.03e-05	493
DUSP11	-0.222	mycn_status: 1 < 0	3.13e-05	493
TYW1	-0.204	mycn_status: 1 < 0	3.37e-05	493
ZC3H7B	-0.17	mycn_status: 1 < 0	3.41e-05	493
PURG	-0.193	mycn_status: 1 < 0	3.51e-05	493
UTP20	0.195	mycn_status: 1 >= 0	3.52e-05	493
REXO1	-0.201	mycn_status: 1 < 0	3.56e-05	493
SUPT4H1 transcription factor	0.175	mycn_status: 1 >= 0	3.6e-05	493
ENOX2 membrane	-0.224	mycn_status: 1 < 0	3.62e-05	493
FAM120A	-0.209	mycn_status: 1 < 0	3.73e-05	493
UNK	-0.198	mycn_status: 1 < 0	3.98e-05	493
IPO7 signal transduction	0.165	mycn_status: 1 >= 0	4e-05	493
URB2	0.193	mycn_status: 1 >= 0	4.04e-05	493
TRMU	-0.205	mycn_status: 1 < 0	4.1e-05	493
EIF4G1	0.147	mycn_status: 1 >= 0	4.1e-05	493
DDX59	-0.205	mycn_status: 1 < 0	4.27e-05	493
SMG5	-0.198	mycn_status: 1 < 0	4.28e-05	493
RPL5	0.21	mycn_status: 1 >= 0	4.3e-05	493
RPLP1	0.144	mycn_status: 1 >= 0	4.52e-05	493
RANBP2	-0.21	mycn_status: 1 < 0	4.52e-05	493
HNRNPA0	0.197	mycn_status: 1 >= 0	5e-05	493
SMAD5 development,signal transduction	-0.222	mycn_status: 1 < 0	5e-05	493
DCAF13	0.154	mycn_status: 1 >= 0	5.01e-05	493
MRPS14	0.174	mycn_status: 1 >= 0	5.1e-05	493
AKAP1 membrane	0.198	mycn_status: 1 >= 0	5.15e-05	493
RPS23	0.181	mycn_status: 1 >= 0	5.23e-05	493
RCL1	0.187	mycn_status: 1 >= 0	5.38e-05	493
INTS6	-0.216	mycn_status: 1 < 0	5.44e-05	493
GARS drug target	-0.194	mycn_status: 1 < 0	5.49e-05	493
PRPF39	-0.215	mycn_status: 1 < 0	5.59e-05	493
IGF2BP3	0.167	mycn_status: 1 >= 0	5.88e-05	493
PSIP1	-0.215	mycn_status: 1 < 0	6e-05	493
A1CF	-0.186	mycn_status: 1 < 0	6.13e-05	493
PATL1	-0.184	mycn_status: 1 < 0	6.56e-05	493
ASH1L membrane	-0.199	mycn_status: 1 < 0	6.68e-05	493
OAS2 membrane	-0.224	mycn_status: 1 < 0	7.26e-05	493
HNRNPM	0.192	mycn_status: 1 >= 0	7.31e-05	493
MRPL54	0.156	mycn_status: 1 >= 0	7.49e-05	493
DARS2 drug target	0.163	mycn_status: 1 >= 0	7.5e-05	493
MTFMT drug target	-0.204	mycn_status: 1 < 0	7.59e-05	493
TRA2B	0.158	mycn_status: 1 >= 0	7.94e-05	493
TARS drug target	0.194	mycn_status: 1 >= 0	8.03e-05	493
SNRPB2	0.168	mycn_status: 1 >= 0	8.35e-05	493
U2AF2	-0.171	mycn_status: 1 < 0	8.47e-05	493
HELZ2	-0.188	mycn_status: 1 < 0	9.2e-05	493
MRPL44	0.186	mycn_status: 1 >= 0	9.26e-05	493
LSM2	0.147	mycn_status: 1 >= 0	9.27e-05	493
YTHDC2	-0.193	mycn_status: 1 < 0	9.69e-05	493
MRPL21	0.17	mycn_status: 1 >= 0	9.81e-05	493
IPO5	0.185	mycn_status: 1 >= 0	0.000101	493
DHX40	-0.204	mycn_status: 1 < 0	0.000105	493
APTX DNA repair,differentiation	-0.197	mycn_status: 1 < 0	0.000111	493
IREB2	-0.204	mycn_status: 1 < 0	0.000117	493
WARS drug target	-0.161	mycn_status: 1 < 0	0.000118	493
LARP6	-0.209	mycn_status: 1 < 0	0.000122	493
TEX13A	-0.18	mycn_status: 1 < 0	0.000126	493
PABPC1L2B	-0.181	mycn_status: 1 < 0	0.000128	493
TTF2	0.178	mycn_status: 1 >= 0	0.000128	493
MRPL9	0.149	mycn_status: 1 >= 0	0.000132	493
RBMY1B	-0.173	mycn_status: 1 < 0	0.000134	493
NPM2 development,differentiation	-0.167	mycn_status: 1 < 0	0.000135	493
EXOSC2	0.162	mycn_status: 1 >= 0	0.000136	493
PIWIL3 development	-0.181	mycn_status: 1 < 0	0.000138	493
CSTF1	0.159	mycn_status: 1 >= 0	0.000144	493
RPL17 signal transduction	0.188	mycn_status: 1 >= 0	0.000146	493
NARS drug target	-0.19	mycn_status: 1 < 0	0.000147	493
UTP15	0.189	mycn_status: 1 >= 0	0.000147	493
HNRNPUL2	-0.181	mycn_status: 1 < 0	0.000156	493
MTHFSD	0.154	mycn_status: 1 >= 0	0.000159	493
DHX57	-0.187	mycn_status: 1 < 0	0.000166	493
TRMT2B	-0.191	mycn_status: 1 < 0	0.000168	493
WDR46	0.116	mycn_status: 1 >= 0	0.000169	493
PRKRA apoptosis,development	-0.187	mycn_status: 1 < 0	0.000172	493
OAS1	-0.178	mycn_status: 1 < 0	0.000174	493
CPSF7	-0.189	mycn_status: 1 < 0	0.000184	493
POP1	0.174	mycn_status: 1 >= 0	0.00019	493
RBM26	-0.211	mycn_status: 1 < 0	0.000198	493
LARP4B	-0.175	mycn_status: 1 < 0	0.0002	493
BRIX1	0.143	mycn_status: 1 >= 0	0.000217	493
RPL3L	-0.158	mycn_status: 1 < 0	0.00023	493
PUS10	-0.198	mycn_status: 1 < 0	0.000244	493
RPL30	0.181	mycn_status: 1 >= 0	0.000244	493
HARS drug target	-0.201	mycn_status: 1 < 0	0.000245	493
ZCCHC5	-0.196	mycn_status: 1 < 0	0.000252	493
PA2G4 transcription factor	0.164	mycn_status: 1 >= 0	0.000261	493
HNRNPK	-0.197	mycn_status: 1 < 0	0.000264	493
GTF2F1	0.169	mycn_status: 1 >= 0	0.000265	493
PRPF38B	-0.199	mycn_status: 1 < 0	0.000267	493
TDRD10	-0.166	mycn_status: 1 < 0	0.000274	493
GPKOW	-0.181	mycn_status: 1 < 0	0.000275	493
RPS18	0.172	mycn_status: 1 >= 0	0.000278	493
SRSF12	-0.177	mycn_status: 1 < 0	0.00028	493
TXNL4A cell cycle	0.173	mycn_status: 1 >= 0	0.00029	493
PDE12	-0.197	mycn_status: 1 < 0	0.000294	493
ANKHD1	-0.175	mycn_status: 1 < 0	0.000298	493
AAR2	-0.158	mycn_status: 1 < 0	0.000305	493
GRSF1 development	0.152	mycn_status: 1 >= 0	0.000313	493
TAF15	-0.197	mycn_status: 1 < 0	0.000318	493
NUP153	-0.173	mycn_status: 1 < 0	0.000322	493
TSEN2	0.147	mycn_status: 1 >= 0	0.000325	493
DIS3L	-0.165	mycn_status: 1 < 0	0.000331	493
DDX53	-0.154	mycn_status: 1 < 0	0.000337	493
HDLBP membrane	0.147	mycn_status: 1 >= 0	0.000343	493
FTO	-0.171	mycn_status: 1 < 0	0.000351	493
IFIT1	-0.153	mycn_status: 1 < 0	0.000357	493
PPP1R10	-0.151	mycn_status: 1 < 0	0.000371	493
CNOT7 signal transduction,transcription factor	0.146	mycn_status: 1 >= 0	0.000372	493
EIF2B4 development,differentiation	-0.184	mycn_status: 1 < 0	0.000385	493
UTP14A	-0.159	mycn_status: 1 < 0	0.000389	493
ZC3H12C	-0.172	mycn_status: 1 < 0	0.000399	493
FAM98C	-0.159	mycn_status: 1 < 0	0.000412	493
XRCC6 DNA repair	0.161	mycn_status: 1 >= 0	0.000423	493
SRP54 membrane	-0.196	mycn_status: 1 < 0	0.000429	493
RNASE8	-0.168	mycn_status: 1 < 0	0.00043	493
PPIH drug target	-0.155	mycn_status: 1 < 0	0.000436	493
PRKDC DNA repair,kinase	0.137	mycn_status: 1 >= 0	0.00044	493
RPF2	0.135	mycn_status: 1 >= 0	0.000448	493
SMAD1 development,signal transduction	-0.158	mycn_status: 1 < 0	0.000463	493
AZGP1 membrane	-0.173	mycn_status: 1 < 0	0.000464	493
POLR2J2	-0.188	mycn_status: 1 < 0	0.000486	493
G3BP1 signal transduction	0.137	mycn_status: 1 >= 0	0.000487	493
PHRF1	-0.156	mycn_status: 1 < 0	0.000503	493
HNRNPF	0.157	mycn_status: 1 >= 0	0.000525	493
FUBP1 transcription factor	0.152	mycn_status: 1 >= 0	0.000529	493
CARS2 drug target	-0.149	mycn_status: 1 < 0	0.000529	493
DDX19A	-0.147	mycn_status: 1 < 0	0.000572	493
MRPS5	-0.194	mycn_status: 1 < 0	0.000587	493
HRSP12	0.111	mycn_status: 1 >= 0	0.000595	493
TPR membrane	-0.211	mycn_status: 1 < 0	0.000604	493
DDX31	0.128	mycn_status: 1 >= 0	0.000606	493
NOC3L	0.153	mycn_status: 1 >= 0	0.000628	493
EIF5A	0.134	mycn_status: 1 >= 0	0.000633	493
WDR4	0.177	mycn_status: 1 >= 0	0.000643	493
PWP2 signal transduction	0.153	mycn_status: 1 >= 0	0.000643	493
CNOT6L	-0.185	mycn_status: 1 < 0	0.000656	493
SHQ1	0.135	mycn_status: 1 >= 0	0.000656	493
HNRNPU	0.142	mycn_status: 1 >= 0	0.000688	493
APOBEC1	-0.138	mycn_status: 1 < 0	0.000746	493
EIF3C	0.154	mycn_status: 1 >= 0	0.00076	493
SRP14	-0.17	mycn_status: 1 < 0	0.000762	493
TRIM25 transcription factor	-0.178	mycn_status: 1 < 0	0.000763	493
EIF1AD	-0.159	mycn_status: 1 < 0	0.000766	493
USB1	-0.162	mycn_status: 1 < 0	0.000804	493
DHX15	0.127	mycn_status: 1 >= 0	0.000809	493
CCNT1 cell cycle	-0.169	mycn_status: 1 < 0	0.00082	493
JAKMIP1	0.127	mycn_status: 1 >= 0	0.000832	493
NOVA2	-0.161	mycn_status: 1 < 0	0.000833	493
RIOK1 kinase	-0.194	mycn_status: 1 < 0	0.000834	493
DDX42	-0.149	mycn_status: 1 < 0	0.000834	493
CTU1	0.14	mycn_status: 1 >= 0	0.000838	493
EIF3L	0.149	mycn_status: 1 >= 0	0.000871	493
MAGOH	-0.154	mycn_status: 1 < 0	0.000906	493
SF3B3	0.143	mycn_status: 1 >= 0	0.000913	493
MRPS6	0.161	mycn_status: 1 >= 0	0.000915	493
PPWD1	-0.176	mycn_status: 1 < 0	0.000993	493
LUC7L development	-0.111	mycn_status: 1 < 0	0.000998	493
ILF3	0.134	mycn_status: 1 >= 0	0.000999	493
RNASE7	-0.148	mycn_status: 1 < 0	0.00101	493
MYEF2 differentiation,transcription factor	-0.191	mycn_status: 1 < 0	0.00105	493
TIAL1 apoptosis	-0.169	mycn_status: 1 < 0	0.00106	493
KHSRP	0.156	mycn_status: 1 >= 0	0.00107	493
FXR1 apoptosis,development	0.131	mycn_status: 1 >= 0	0.0011	493
RNASE2	-0.169	mycn_status: 1 < 0	0.0011	493
SREK1	-0.171	mycn_status: 1 < 0	0.00122	493
DDX52	-0.176	mycn_status: 1 < 0	0.00122	493
SNRNP200	0.139	mycn_status: 1 >= 0	0.00124	493
MRPL47	0.13	mycn_status: 1 >= 0	0.00133	493
PRPF18	-0.172	mycn_status: 1 < 0	0.00134	493
RPUSD3	-0.147	mycn_status: 1 < 0	0.00139	493
DDX41 apoptosis,development	-0.164	mycn_status: 1 < 0	0.00141	493
GPATCH1	-0.169	mycn_status: 1 < 0	0.00142	493
RBMS3	-0.138	mycn_status: 1 < 0	0.0015	493
ZNF638	-0.194	mycn_status: 1 < 0	0.00153	493
EEF1E1 DNA repair,apoptosis	0.11	mycn_status: 1 >= 0	0.00161	493
MTIF3	-0.17	mycn_status: 1 < 0	0.00161	493
C9orf114	-0.169	mycn_status: 1 < 0	0.00162	493
DND1 development	-0.16	mycn_status: 1 < 0	0.00169	493
LONP1	0.136	mycn_status: 1 >= 0	0.00171	493
ADAT1	-0.171	mycn_status: 1 < 0	0.00175	493
TSNAX	-0.183	mycn_status: 1 < 0	0.00176	493
ZC3H10	-0.14	mycn_status: 1 < 0	0.00183	493
PAPOLG	-0.161	mycn_status: 1 < 0	0.00184	493
LARS2 drug target	0.133	mycn_status: 1 >= 0	0.00185	493
PTRH1	-0.148	mycn_status: 1 < 0	0.00189	493
ZMAT2	-0.139	mycn_status: 1 < 0	0.00199	493
DDX51	-0.127	mycn_status: 1 < 0	0.002	493
RANBP17	0.161	mycn_status: 1 >= 0	0.00211	493
DDX46	-0.176	mycn_status: 1 < 0	0.00215	493
RPL27	0.145	mycn_status: 1 >= 0	0.00221	493
PIH1D3	-0.129	mycn_status: 1 < 0	0.00221	493
ZNF473	0.131	mycn_status: 1 >= 0	0.00223	493
MRPL10	0.133	mycn_status: 1 >= 0	0.00232	493
MRPS10	-0.151	mycn_status: 1 < 0	0.00242	493
THOC5	-0.158	mycn_status: 1 < 0	0.00245	493
MARS2	0.135	mycn_status: 1 >= 0	0.00246	493
PUF60	-0.154	mycn_status: 1 < 0	0.00252	493
EIF2A	0.128	mycn_status: 1 >= 0	0.00265	493
NMD3	0.136	mycn_status: 1 >= 0	0.00272	493
WDR5 development	0.105	mycn_status: 1 >= 0	0.00275	493
XPO1 membrane	-0.169	mycn_status: 1 < 0	0.00276	493
IARS drug target	0.117	mycn_status: 1 >= 0	0.00283	493
ALKBH1 DNA repair	-0.122	mycn_status: 1 < 0	0.00288	493
GTPBP4 signal transduction	0.128	mycn_status: 1 >= 0	0.00299	493
MRPL40	-0.168	mycn_status: 1 < 0	0.00302	493
GEMIN5	0.116	mycn_status: 1 >= 0	0.0031	493
RPS26	0.143	mycn_status: 1 >= 0	0.00311	493
GSPT1 cell cycle	0.094	mycn_status: 1 >= 0	0.00311	493
SF3B14	0.108	mycn_status: 1 >= 0	0.00315	493
RBM11	0.145	mycn_status: 1 >= 0	0.00319	493
YBX1 transcription factor	-0.125	mycn_status: 1 < 0	0.00338	493
STRBP development,differentiation	0.114	mycn_status: 1 >= 0	0.00339	493
UPF1 DNA repair,cell cycle	-0.116	mycn_status: 1 < 0	0.00351	493
RBM17	-0.151	mycn_status: 1 < 0	0.00354	493
RBM39	-0.165	mycn_status: 1 < 0	0.00376	493
RPL37A	0.11	mycn_status: 1 >= 0	0.00378	493
SCAF1	-0.157	mycn_status: 1 < 0	0.00379	493
NOC4L membrane	-0.134	mycn_status: 1 < 0	0.0038	493
SF3B2	-0.146	mycn_status: 1 < 0	0.0038	493
MATR3	-0.167	mycn_status: 1 < 0	0.00385	493
XAB2 DNA repair,development	0.116	mycn_status: 1 >= 0	0.00385	493
METTL2B	-0.168	mycn_status: 1 < 0	0.00388	493
TNRC6A	-0.171	mycn_status: 1 < 0	0.00401	493
IMP4	0.108	mycn_status: 1 >= 0	0.00405	493
SRP19	-0.175	mycn_status: 1 < 0	0.00405	493
SURF6	-0.144	mycn_status: 1 < 0	0.00409	493
TRMT11	0.125	mycn_status: 1 >= 0	0.00419	493
SF3B5	0.145	mycn_status: 1 >= 0	0.00419	493
UPF2	-0.148	mycn_status: 1 < 0	0.0042	493
RPP21	-0.138	mycn_status: 1 < 0	0.00428	493
RPUSD2	0.139	mycn_status: 1 >= 0	0.00432	493
SMAD6	-0.135	mycn_status: 1 < 0	0.00441	493
MRP63	0.13	mycn_status: 1 >= 0	0.00454	493
RNMTL1	-0.134	mycn_status: 1 < 0	0.00456	493
CSTF3	0.133	mycn_status: 1 >= 0	0.00459	493
TRPT1	-0.107	mycn_status: 1 < 0	0.00465	493
PCBP4 apoptosis	-0.134	mycn_status: 1 < 0	0.00481	493
STAU1	-0.157	mycn_status: 1 < 0	0.00505	493
IGHMBP2 DNA repair	-0.104	mycn_status: 1 < 0	0.00524	493
MRPL32	-0.126	mycn_status: 1 < 0	0.00546	493
RBM19	-0.123	mycn_status: 1 < 0	0.00551	493
ZNF579	-0.095	mycn_status: 1 < 0	0.00597	493
MRPL50	0.107	mycn_status: 1 >= 0	0.00626	493
PUM2	-0.167	mycn_status: 1 < 0	0.00632	493
RBM12	-0.143	mycn_status: 1 < 0	0.00647	493
RBMXL1	-0.15	mycn_status: 1 < 0	0.00648	493
EIF3K	0.117	mycn_status: 1 >= 0	0.00657	493
SF1 kinase	-0.122	mycn_status: 1 < 0	0.00678	493
PSPC1	-0.161	mycn_status: 1 < 0	0.00679	493
PRPF3	0.146	mycn_status: 1 >= 0	0.00702	493
SAFB	0.08	mycn_status: 1 >= 0	0.00714	493
LARS drug target	0.131	mycn_status: 1 >= 0	0.00714	493
MRPS31	-0.145	mycn_status: 1 < 0	0.00728	493
SNRPC	-0.128	mycn_status: 1 < 0	0.00735	493
GFM2	-0.16	mycn_status: 1 < 0	0.00736	493
EIF2AK3 apoptosis,development	-0.121	mycn_status: 1 < 0	0.00748	493
ZCRB1	-0.124	mycn_status: 1 < 0	0.00779	493
SLBP	0.098	mycn_status: 1 >= 0	0.00781	493
WDR36	-0.157	mycn_status: 1 < 0	0.00801	493
ZMAT3	-0.164	mycn_status: 1 < 0	0.00806	493
DNMT1 drug target	0.07	mycn_status: 1 >= 0	0.0081	493
BUD13	0.131	mycn_status: 1 >= 0	0.0082	493
SKIV2L	-0.126	mycn_status: 1 < 0	0.00834	493
EIF1B	-0.129	mycn_status: 1 < 0	0.0086	493
MRPL46	0.129	mycn_status: 1 >= 0	0.00899	493
EIF2B2 development,differentiation	0.091	mycn_status: 1 >= 0	0.00926	493
EIF4A3	-0.126	mycn_status: 1 < 0	0.00941	493
SNRNP25	0.107	mycn_status: 1 >= 0	0.00953	493
TRMT61A	-0.124	mycn_status: 1 < 0	0.00958	493
LIN28B	0.11	mycn_status: 1 >= 0	0.00971	493
PPIL3	0.115	mycn_status: 1 >= 0	0.00999	493
DDX3Y	-0.102	mycn_status: 1 < 0	0.01	493
PAPOLA	-0.148	mycn_status: 1 < 0	0.01	493
DDX49	0.1	mycn_status: 1 >= 0	0.01	493
NOL7	-0.148	mycn_status: 1 < 0	0.01	493
DROSHA	-0.114	mycn_status: 1 < 0	0.011	493
RALY	-0.155	mycn_status: 1 < 0	0.011	493
ATXN2L membrane	0.102	mycn_status: 1 >= 0	0.011	493
SRSF7	0.107	mycn_status: 1 >= 0	0.011	493
ZC3HC1 apoptosis,cell cycle	-0.12	mycn_status: 1 < 0	0.011	493
INTS7	0.116	mycn_status: 1 >= 0	0.011	493
RBM4	0.071	mycn_status: 1 >= 0	0.012	493
MRPL39	0.087	mycn_status: 1 >= 0	0.012	493
WIBG	-0.118	mycn_status: 1 < 0	0.012	493
EIF2B5 development,differentiation	-0.125	mycn_status: 1 < 0	0.012	493
RBM7 cell cycle	-0.138	mycn_status: 1 < 0	0.012	493
XRN2 DNA repair	0.078	mycn_status: 1 >= 0	0.012	493
AKAP8L	-0.134	mycn_status: 1 < 0	0.012	493
EEFSEC	-0.149	mycn_status: 1 < 0	0.012	493
RRP12 membrane	0.07	mycn_status: 1 >= 0	0.012	493
MSI2	0.135	mycn_status: 1 >= 0	0.013	493
LARP7	0.052	mycn_status: 1 >= 0	0.013	493
RBM33	-0.125	mycn_status: 1 < 0	0.013	493
DDX3X	-0.147	mycn_status: 1 < 0	0.013	493
DZIP1 development,differentiation	0.118	mycn_status: 1 >= 0	0.013	493
TYW3	-0.111	mycn_status: 1 < 0	0.013	493
MSI1 development	-0.117	mycn_status: 1 < 0	0.014	493
TFB2M	0.087	mycn_status: 1 >= 0	0.014	493
DUS4L	-0.144	mycn_status: 1 < 0	0.015	493
DDX50	0.087	mycn_status: 1 >= 0	0.015	493
SAFB2	-0.134	mycn_status: 1 < 0	0.016	493
PABPN1	-0.128	mycn_status: 1 < 0	0.016	493
PTBP1	0.064	mycn_status: 1 >= 0	0.016	493
CSDC2	-0.106	mycn_status: 1 < 0	0.017	493
ARHGEF28	-0.163	mycn_status: 1 < 0	0.017	493
EIF3G	0.09	mycn_status: 1 >= 0	0.017	493
RARS	0.099	mycn_status: 1 >= 0	0.018	493
CAPRIN1 membrane	0.098	mycn_status: 1 >= 0	0.018	493
SETD7	0.089	mycn_status: 1 >= 0	0.018	493
RDM1	-0.126	mycn_status: 1 < 0	0.018	493
RNPC3	-0.121	mycn_status: 1 < 0	0.018	493
LSMD1	-0.115	mycn_status: 1 < 0	0.018	493
ELAC2	-0.106	mycn_status: 1 < 0	0.019	493
XPO5	0.093	mycn_status: 1 >= 0	0.02	493
DHX34	-0.094	mycn_status: 1 < 0	0.02	493
RPP30	0.079	mycn_status: 1 >= 0	0.02	493
NOL6	0.072	mycn_status: 1 >= 0	0.02	493
TSN	-0.132	mycn_status: 1 < 0	0.02	493
MRPS18C	0.099	mycn_status: 1 >= 0	0.02	493
NGDN	0.081	mycn_status: 1 >= 0	0.021	493
EIF2D	0.124	mycn_status: 1 >= 0	0.021	493
MEX3D	-0.069	mycn_status: 1 < 0	0.022	493
SPATS2L	-0.093	mycn_status: 1 < 0	0.022	493
ABCF1	-0.115	mycn_status: 1 < 0	0.023	493
MAK16	0.081	mycn_status: 1 >= 0	0.024	493
EXOSC8	-0.087	mycn_status: 1 < 0	0.024	493
POP4	-0.119	mycn_status: 1 < 0	0.025	493
SRRM2	-0.114	mycn_status: 1 < 0	0.025	493
STAU2	-0.146	mycn_status: 1 < 0	0.026	493
RBM6	-0.096	mycn_status: 1 < 0	0.027	493
PCF11	-0.097	mycn_status: 1 < 0	0.027	493
SNUPN	0.095	mycn_status: 1 >= 0	0.027	493
SART1 apoptosis	0.084	mycn_status: 1 >= 0	0.027	493
RPS12	0.071	mycn_status: 1 >= 0	0.028	493
EIF1AX	0.052	mycn_status: 1 >= 0	0.028	493
MRPL42	0.089	mycn_status: 1 >= 0	0.028	493
SNRNP35	-0.062	mycn_status: 1 < 0	0.029	493
RPL6	0.071	mycn_status: 1 >= 0	0.029	493
EEF1A1	0.094	mycn_status: 1 >= 0	0.029	493
PARP4 DNA repair,differentiation	-0.106	mycn_status: 1 < 0	0.03	493
FUS	0.077	mycn_status: 1 >= 0	0.03	493
DDX25	-0.098	mycn_status: 1 < 0	0.03	493
GLE1	-0.117	mycn_status: 1 < 0	0.031	493
FMR1	-0.119	mycn_status: 1 < 0	0.031	493
TRMT12	-0.119	mycn_status: 1 < 0	0.031	493
RBM41	0.087	mycn_status: 1 >= 0	0.031	493
DDX28	0.102	mycn_status: 1 >= 0	0.031	493
NIP7	0.061	mycn_status: 1 >= 0	0.032	493
EIF5	0.072	mycn_status: 1 >= 0	0.033	493
DHX9	0.103	mycn_status: 1 >= 0	0.033	493
PINX1 cell cycle	0.056	mycn_status: 1 >= 0	0.034	493
UPF3B	0.096	mycn_status: 1 >= 0	0.034	493
PNN cell cycle,membrane	0.072	mycn_status: 1 >= 0	0.034	493
NANOS1	-0.117	mycn_status: 1 < 0	0.034	493
INTS12	0.05	mycn_status: 1 >= 0	0.035	493
PRR3	-0.113	mycn_status: 1 < 0	0.036	493
ANKRD17 DNA repair	-0.119	mycn_status: 1 < 0	0.036	493
METTL3	-0.105	mycn_status: 1 < 0	0.038	493
RAVER1	-0.097	mycn_status: 1 < 0	0.038	493
NOP9	-0.12	mycn_status: 1 < 0	0.039	493
AARSD1	-0.118	mycn_status: 1 < 0	0.039	493
CELF1	-0.114	mycn_status: 1 < 0	0.039	493
U2SURP	0.067	mycn_status: 1 >= 0	0.039	493
RPS27A	0.105	mycn_status: 1 >= 0	0.039	493
NSA2	0.089	mycn_status: 1 >= 0	0.04	493
PPAN	0.084	mycn_status: 1 >= 0	0.04	493
MRPS28	-0.107	mycn_status: 1 < 0	0.041	493
CEBPZ	0.073	mycn_status: 1 >= 0	0.042	493
RBM14 DNA repair,signal transduction	0.091	mycn_status: 1 >= 0	0.042	493
DUS1L	0.091	mycn_status: 1 >= 0	0.043	493
THUMPD2	0.083	mycn_status: 1 >= 0	0.044	493
SON apoptosis	-0.102	mycn_status: 1 < 0	0.044	493
ZNHIT6	-0.099	mycn_status: 1 < 0	0.044	493
NOP56	-0.098	mycn_status: 1 < 0	0.046	493
FUBP3	-0.121	mycn_status: 1 < 0	0.046	493
SUGP1	-0.113	mycn_status: 1 < 0	0.047	493
FRG1B	0.073	mycn_status: 1 >= 0	0.047	493
QARS	0.058	mycn_status: 1 >= 0	0.048	493
IGF2BP2	-0.09	mycn_status: 1 < 0	0.048	493
DCP1A	0.094	mycn_status: 1 >= 0	0.048	493
,differentiation,transcription factor
,signal transduction
,signal transduction
,transcription factor
,signal transduction
,membrane
,transcription factor
,signal transduction
,signal transduction
,signal transduction,transcription factor
,signal transduction
,differentiation
,differentiation
,membrane
,membrane
,cell cycle,signal transduction
,transcription factor
,membrane
,kinase
,transcription factor
,signal transduction
,transcription factor
,differentiation
,development
,differentiation,kinase
,membrane,signal transduction

## Sheet: Table S2 Stage 4 VS Stage 4S
#H:probeset	hugo	correct	HUGO	R	Combi	pval (FDR)	Expressed in number of tumours (total is 236)				#Program: R2: Genomics analysis and visualization platform
UKv4_A_23_P100056	RBPMS2	kruskal	BAZ2B	0.488	inss_stage: 4s >= 4	6.79e-11	236				#Website: http://r2.amc.nl
UKv4_A_23_P100141	UNKL	kruskal	PTRH2 apoptosis	-0.483	inss_stage: 4s < 4	1.57e-10	236				#Developer: Jan Koster (jankoster@amc.uva.nl)
UKv4_A_23_P100220	ESRP2	kruskal	RBFOX1	0.395	inss_stage: 4s >= 4	4.72e-10	236				#Support: r2-support@amc.uva.nl
UKv4_A_23_P100413	EXOSC6	kruskal	TRMT112	-0.47	inss_stage: 4s < 4	5.22e-10	236				#Date: Tue Mar 10 12:11:45 2020
UKv4_A_23_P100420	ZCCHC14	kruskal	TIA1 apoptosis	0.447	inss_stage: 4s >= 4	5.54e-10	236				#Dataset: ps_avgpres_gse49710geo498_ag44kcwolf
UKv4_A_23_P100676	SMG6	kruskal	ATXN1 differentiation	0.442	inss_stage: 4s >= 4	6.74e-10	236				#Pretty_dataset: Tumor Neuroblastoma - SEQC - 498 - custom - ag44kcwolf
UKv4_A_23_P101532	RPS11	kruskal	ALYREF	-0.429	inss_stage: 4s < 4	2.46e-09	236				#Genefiltering: applied
UKv4_A_23_P101960	ZFP36L2	kruskal	SRRM4	0.413	inss_stage: 4s >= 4	1.01e-08	236				#Genefilters: RBPs_2014 only
UKv4_A_23_P102235	SNRPG	kruskal	IGF2BP2	0.423	inss_stage: 4s >= 4	1.11e-08	236				#Data transformation: transform_2log
UKv4_A_23_P102890	MRPS6	kruskal	CPSF3L	0.381	inss_stage: 4s >= 4	2.39e-08	236				#Data values:
UKv4_A_23_P103099	RBFOX2	kruskal	RNF113A development	-0.419	inss_stage: 4s < 4	2.57e-08	236				#Comparison: groups
UKv4_A_23_P103120	GTPBP1	kruskal	MRPL11	-0.414	inss_stage: 4s < 4	2.76e-08	236				#Track: inss_stage
UKv4_A_23_P103201	PNRC2	kruskal	TRA2A	0.375	inss_stage: 4s >= 4	3.75e-08	236				#Group: inss_stage -> 4
UKv4_A_23_P103334	RC3H1	kruskal	NOP16	-0.394	inss_stage: 4s < 4	4.39e-08	236				#Group: inss_stage -> 4s
UKv4_A_23_P10374	R3HDM2	kruskal	PIWIL4 development	0.381	inss_stage: 4s >= 4	4.4e-08	236				#Test: kruskal
UKv4_A_23_P104116	RBM8A	kruskal	MTERFD2	0.392	inss_stage: 4s >= 4	4.5e-08	236				#Output: kruskal 0.05 fdr
UKv4_A_23_P104224	A1CF	kruskal	EXOSC10	0.397	inss_stage: 4s >= 4	4.62e-08	236				#Minimal presentcalls: 50
UKv4_A_23_P104451	DDX50	kruskal	RBMX2	-0.391	inss_stage: 4s < 4	5.11e-08	236				#Minimal highest expression: 50
UKv4_A_23_P105044	MRPL23	kruskal	SUPT4H1 transcription factor	-0.377	inss_stage: 4s < 4	5.72e-08	236				#Subset: TRACKER (236)
UKv4_A_23_P105664	CCDC59	kruskal	ICT1	-0.356	inss_stage: 4s < 4	7.19e-08	236				#Subset_string: TRACKER:159e5cc8811581cf1cace8464c3b69ae
UKv4_A_23_P106080	RNASE7	kruskal	RBPMS	0.367	inss_stage: 4s >= 4	9.85e-08	236				#Number of lines: 674
UKv4_A_23_P106497	IREB2	kruskal	PAPOLB	0.372	inss_stage: 4s >= 4	1.03e-07	236				#r2filetype: datasetresult
UKv4_A_23_P106633	DDX28	kruskal	POP7	-0.395	inss_stage: 4s < 4	1.04e-07	236
UKv4_A_23_P106737	LUC7L	kruskal	PARP4 DNA repair,differentiation	0.362	inss_stage: 4s >= 4	1.08e-07	236
UKv4_A_23_P106822	NOB1	kruskal	RBM43	0.351	inss_stage: 4s >= 4	1.22e-07	236
UKv4_A_23_P106998	MRPS23	kruskal	L1TD1	0.383	inss_stage: 4s >= 4	1.27e-07	236
UKv4_A_23_P107644	SNRPD1	kruskal	SMG6	0.366	inss_stage: 4s >= 4	1.28e-07	236
UKv4_A_23_P108554	DDX1	kruskal	RRBP1 membrane,signal transduction	0.373	inss_stage: 4s >= 4	1.39e-07	236
UKv4_A_23_P108871	ZC3H8	kruskal	SPATS2L	0.365	inss_stage: 4s >= 4	1.4e-07	236
UKv4_A_23_P110433	PPWD1	kruskal	MBNL2	0.352	inss_stage: 4s >= 4	2.33e-07	236
UKv4_A_23_P110846	CNOT8	kruskal	HNRNPC	-0.379	inss_stage: 4s < 4	3.56e-07	236
UKv4_A_23_P110851	TERT	kruskal	CPEB2	0.327	inss_stage: 4s >= 4	3.56e-07	236
UKv4_A_23_P111112	VARS2	kruskal	ADARB1	0.368	inss_stage: 4s >= 4	3.66e-07	236
UKv4_A_23_P111297	RPP40	kruskal	PAN2	0.344	inss_stage: 4s >= 4	3.7e-07	236
UKv4_A_23_P111303	SCAF8	kruskal	CCDC86	-0.382	inss_stage: 4s < 4	3.73e-07	236
UKv4_A_23_P111804	PARP12	kruskal	CPEB3	0.354	inss_stage: 4s >= 4	3.74e-07	236
UKv4_A_23_P111919	PURG	kruskal	GTPBP2 signal transduction	0.328	inss_stage: 4s >= 4	3.79e-07	236
UKv4_A_23_P111961	MAK16	kruskal	RBMS1	0.35	inss_stage: 4s >= 4	3.83e-07	236
UKv4_A_23_P11214	NKRF	kruskal	RAN cell cycle,signal transduction	-0.4	inss_stage: 4s < 4	3.97e-07	236
UKv4_A_23_P112429	RPL35	kruskal	MTRF1	0.363	inss_stage: 4s >= 4	4.49e-07	236
UKv4_A_23_P113623	MRPL45	kruskal	SNRPF	-0.362	inss_stage: 4s < 4	4.53e-07	236
UKv4_A_23_P113728	MTG1	kruskal	MRPS23	-0.351	inss_stage: 4s < 4	4.64e-07	236
UKv4_A_23_P114282	MCTS1	kruskal	RRNAD1	0.333	inss_stage: 4s >= 4	4.7e-07	236
UKv4_A_23_P114353	NXF5	kruskal	SNRPD1	-0.375	inss_stage: 4s < 4	6.89e-07	236
UKv4_A_23_P114662	CRYZ	kruskal	AUH	0.339	inss_stage: 4s >= 4	7.24e-07	236
UKv4_A_23_P114783	PARP1	kruskal	CLK1 kinase	0.351	inss_stage: 4s >= 4	8.74e-07	236
UKv4_A_23_P115036	IPO13	kruskal	A1CF	0.372	inss_stage: 4s >= 4	9.81e-07	236
UKv4_A_23_P115824	HNRNPH3	kruskal	SART1 apoptosis	-0.346	inss_stage: 4s < 4	9.93e-07	236
UKv4_A_23_P115955	MRPL21	kruskal	TYW5	0.35	inss_stage: 4s >= 4	1.17e-06	236
UKv4_A_23_P116081	RNASEH2C	kruskal	ZCCHC6	0.334	inss_stage: 4s >= 4	1.18e-06	236
UKv4_A_23_P11664	SRSF11	kruskal	MRPS12	-0.348	inss_stage: 4s < 4	1.19e-06	236
UKv4_A_23_P117068	SNRPF	kruskal	AFF3 development	0.348	inss_stage: 4s >= 4	1.19e-06	236
UKv4_A_23_P117175	PARP4	kruskal	TUT1	-0.368	inss_stage: 4s < 4	1.2e-06	236
UKv4_A_23_P118038	NUTF2	kruskal	GRWD1	-0.339	inss_stage: 4s < 4	1.65e-06	236
UKv4_A_23_P118095	RPL3L	kruskal	SAMD4A	0.349	inss_stage: 4s >= 4	1.88e-06	236
UKv4_A_23_P118353	SRP68	kruskal	MRPS34	-0.339	inss_stage: 4s < 4	1.94e-06	236
UKv4_A_23_P118643	EIF4E	kruskal	C17orf85	0.333	inss_stage: 4s >= 4	1.97e-06	236
UKv4_A_23_P120048	BAZ2B	kruskal	SRRM3	0.324	inss_stage: 4s >= 4	2.31e-06	236
UKv4_A_23_P120062	GCFC2	kruskal	RBFOX2	0.313	inss_stage: 4s >= 4	2.34e-06	236
UKv4_A_23_P12010	RRNAD1	kruskal	SFSWAP	0.313	inss_stage: 4s >= 4	2.51e-06	236
UKv4_A_23_P120566	RRBP1	kruskal	FAM120B	0.318	inss_stage: 4s >= 4	2.58e-06	236
UKv4_A_23_P12062	TRIT1	kruskal	FAU	-0.334	inss_stage: 4s < 4	2.59e-06	236
UKv4_A_23_P120660	RPS21	kruskal	SMAD9 development	0.311	inss_stage: 4s >= 4	2.65e-06	236
UKv4_A_23_P120942	XRCC6	kruskal	ZC3H13	0.322	inss_stage: 4s >= 4	2.82e-06	236
UKv4_A_23_P121405	RBM15B	kruskal	GEMIN6	-0.338	inss_stage: 4s < 4	2.96e-06	236
UKv4_A_23_P121956	THG1L	kruskal	KPNB1	-0.334	inss_stage: 4s < 4	3.22e-06	236
UKv4_A_23_P123039	NUPL2	kruskal	BICC1 development	0.345	inss_stage: 4s >= 4	3.66e-06	236
UKv4_A_23_P123672	TDRD7	kruskal	SRSF4	0.325	inss_stage: 4s >= 4	3.7e-06	236
UKv4_A_23_P123727	ZCCHC6	kruskal	CCNT2 cell cycle	0.328	inss_stage: 4s >= 4	3.73e-06	236
UKv4_A_23_P123905	EXOSC3	kruskal	MOV10 development	0.332	inss_stage: 4s >= 4	3.91e-06	236
UKv4_A_23_P126197	SRSF4	kruskal	RBM5 cell cycle	0.341	inss_stage: 4s >= 4	4.25e-06	236
UKv4_A_23_P126241	EIF4G3	kruskal	MCTS1	-0.345	inss_stage: 4s < 4	4.26e-06	236
UKv4_A_23_P126291	SNRPE	kruskal	SETD7	0.304	inss_stage: 4s >= 4	4.95e-06	236
UKv4_A_23_P126757	INTS3	kruskal	NPM3	-0.317	inss_stage: 4s < 4	4.97e-06	236
UKv4_A_23_P128067	RPL41	kruskal	RPS13	-0.344	inss_stage: 4s < 4	5.18e-06	236
UKv4_A_23_P128574	ENOX1	kruskal	MRPL3	-0.329	inss_stage: 4s < 4	5.95e-06	236
UKv4_A_23_P128624	CARS2	kruskal	LRRFIP2 signal transduction	0.305	inss_stage: 4s >= 4	6.51e-06	236
UKv4_A_23_P128991	SLIRP	kruskal	EXOSC4	-0.329	inss_stage: 4s < 4	7.2e-06	236
UKv4_A_23_P129005	NYNRIN	kruskal	SF3B1	0.326	inss_stage: 4s >= 4	7.2e-06	236
UKv4_A_23_P129128	TARSL2	kruskal	ZCCHC11	0.312	inss_stage: 4s >= 4	8.76e-06	236
UKv4_A_23_P129513	MRPL28	kruskal	PIWIL2 development,differentiation	0.225	inss_stage: 4s >= 4	9.24e-06	236
UKv4_A_23_P129717	ERI2	kruskal	PAN3	0.306	inss_stage: 4s >= 4	9.24e-06	236
UKv4_A_23_P12992	TRMT112	kruskal	R3HDM2	0.311	inss_stage: 4s >= 4	9.8e-06	236
UKv4_A_23_P130020	UTP18	kruskal	NGDN	-0.329	inss_stage: 4s < 4	1.08e-05	236
UKv4_A_23_P130304	TXNL4A	kruskal	LUC7L2	0.314	inss_stage: 4s >= 4	1.14e-05	236
UKv4_A_23_P13033	RBM4	kruskal	INTS1 membrane	0.315	inss_stage: 4s >= 4	1.16e-05	236
UKv4_A_23_P131255	SPATS2L	kruskal	LSM4	-0.339	inss_stage: 4s < 4	1.21e-05	236
UKv4_A_23_P131417	HDLBP	kruskal	SIDT2 membrane	0.287	inss_stage: 4s >= 4	1.27e-05	236
UKv4_A_23_P131664	RANBP2	kruskal	BZW2 development,differentiation	-0.324	inss_stage: 4s < 4	1.29e-05	236
UKv4_A_23_P131967	CRNKL1	kruskal	RNASEH2C	-0.318	inss_stage: 4s < 4	1.29e-05	236
UKv4_A_23_P132216	SNRPD3	kruskal	NAT10	-0.324	inss_stage: 4s < 4	1.3e-05	236
UKv4_A_23_P132784	FXR1	kruskal	NHP2	-0.323	inss_stage: 4s < 4	1.39e-05	236
UKv4_A_23_P132874	CMSS1	kruskal	RPS21 differentiation	-0.311	inss_stage: 4s < 4	1.42e-05	236
UKv4_A_23_P132910	RBM47	kruskal	EXO1 DNA repair,cell cycle	-0.35	inss_stage: 4s < 4	1.43e-05	236
UKv4_A_23_P133284	RIOK2	kruskal	AFF1 transcription factor	0.29	inss_stage: 4s >= 4	1.43e-05	236
UKv4_A_23_P133332	MRPS27	kruskal	RNASEH2A	-0.321	inss_stage: 4s < 4	1.44e-05	236
UKv4_A_23_P13344	EEF1G	kruskal	EXOSC9	-0.318	inss_stage: 4s < 4	1.44e-05	236
UKv4_A_23_P13359	NXF1	kruskal	NXF2 development	-0.288	inss_stage: 4s < 4	1.44e-05	236
UKv4_A_23_P134274	POP7	kruskal	DZIP1L differentiation	0.322	inss_stage: 4s >= 4	1.44e-05	236
UKv4_A_23_P134650	PTCD1	kruskal	ELAVL4	0.289	inss_stage: 4s >= 4	1.48e-05	236
UKv4_A_23_P135357	RNMTL1	kruskal	MRPL21	-0.297	inss_stage: 4s < 4	1.54e-05	236
UKv4_A_23_P135857	EIF2AK3	kruskal	ZFP36L1 development,differentiation	0.295	inss_stage: 4s >= 4	1.54e-05	236
UKv4_A_23_P137143	DKC1	kruskal	TRIM56	0.301	inss_stage: 4s >= 4	1.57e-05	236
UKv4_A_23_P137484	L1TD1	kruskal	SNRPE	-0.315	inss_stage: 4s < 4	1.6e-05	236
UKv4_A_23_P138975	RBM7	kruskal	LSM1	-0.312	inss_stage: 4s < 4	1.62e-05	236
UKv4_A_23_P13899	GAPDH	kruskal	DDX28	-0.328	inss_stage: 4s < 4	1.82e-05	236
UKv4_A_23_P13914	DHX37	kruskal	NOM1	0.308	inss_stage: 4s >= 4	1.85e-05	236
UKv4_A_23_P139376	RPS3	kruskal	TARBP1	0.307	inss_stage: 4s >= 4	2.04e-05	236
UKv4_A_23_P140035	WBP4	kruskal	PSMA6	-0.318	inss_stage: 4s < 4	2.07e-05	236
UKv4_A_23_P140490	CELF6	kruskal	SNRPD2	-0.278	inss_stage: 4s < 4	2.22e-05	236
UKv4_A_23_P140698	DNAJC17	kruskal	RRS1	-0.298	inss_stage: 4s < 4	2.24e-05	236
UKv4_A_23_P140858	RBFOX1	kruskal	BAZ2A	0.298	inss_stage: 4s >= 4	2.28e-05	236
UKv4_A_23_P141194	ICT1	kruskal	CELF6	0.285	inss_stage: 4s >= 4	2.31e-05	236
UKv4_A_23_P141479	SUPT6H	kruskal	SNRNP70	0.214	inss_stage: 4s >= 4	2.4e-05	236
UKv4_A_23_P141549	RPS7	kruskal	RPL22L1	-0.292	inss_stage: 4s < 4	2.5e-05	236
UKv4_A_23_P14157	DZIP1	kruskal	R3HDM1	0.3	inss_stage: 4s >= 4	2.7e-05	236
UKv4_A_23_P141636	EIF4A3	kruskal	NXT1	-0.32	inss_stage: 4s < 4	2.72e-05	236
UKv4_A_23_P141656	DRG2	kruskal	SRSF11	0.287	inss_stage: 4s >= 4	2.87e-05	236
UKv4_A_23_P142146	RPL18	kruskal	DNAJC17	0.303	inss_stage: 4s >= 4	2.88e-05	236
UKv4_A_23_P142154	GRWD1	kruskal	DKC1	-0.292	inss_stage: 4s < 4	3.09e-05	236
UKv4_A_23_P142173	DHX34	kruskal	RBM4	-0.279	inss_stage: 4s < 4	3.17e-05	236
UKv4_A_23_P142750	EIF2AK2	kruskal	CMSS1	-0.3	inss_stage: 4s < 4	3.2e-05	236
UKv4_A_23_P14340	KIAA0391	kruskal	MTG1	0.312	inss_stage: 4s >= 4	3.24e-05	236
UKv4_A_23_P143713	APOBEC3G	kruskal	DIS3L2	0.29	inss_stage: 4s >= 4	3.31e-05	236
UKv4_A_23_P143774	MOV10L1	kruskal	RNASE4	0.329	inss_stage: 4s >= 4	3.39e-05	236
UKv4_A_23_P143845	TIPARP	kruskal	MRPL12	-0.299	inss_stage: 4s < 4	3.56e-05	236
UKv4_A_23_P143958	RPL22L1	kruskal	DDX4 development	0.303	inss_stage: 4s >= 4	3.63e-05	236
UKv4_A_23_P144274	JAKMIP1	kruskal	RBM47	0.303	inss_stage: 4s >= 4	3.88e-05	236
UKv4_A_23_P144726	NOP16	kruskal	ZC3H6	0.276	inss_stage: 4s >= 4	3.89e-05	236
UKv4_A_23_P14493	DNAAF2	kruskal	POLR2H	-0.297	inss_stage: 4s < 4	4.05e-05	236
UKv4_A_23_P144944	SMAD5	kruskal	N4BP1	0.285	inss_stage: 4s >= 4	4.13e-05	236
UKv4_A_23_P145068	MTO1	kruskal	DDX17	0.299	inss_stage: 4s >= 4	4.24e-05	236
UKv4_A_23_P145197	BYSL	kruskal	PABPC5	0.284	inss_stage: 4s >= 4	4.35e-05	236
UKv4_A_23_P146187	RRS1	kruskal	SECISBP2L	0.268	inss_stage: 4s >= 4	4.41e-05	236
UKv4_A_23_P146237	XPO7	kruskal	CDC5L cell cycle	0.277	inss_stage: 4s >= 4	4.43e-05	236
UKv4_A_23_P147277	TSEN54	kruskal	FRG1B	-0.252	inss_stage: 4s < 4	4.47e-05	236
UKv4_A_23_P147888	RPLP2	kruskal	PTBP2	0.29	inss_stage: 4s >= 4	4.5e-05	236
UKv4_A_23_P148568	NXF2	kruskal	ZNF346 apoptosis	0.285	inss_stage: 4s >= 4	4.51e-05	236
UKv4_A_23_P150286	PSMA1	kruskal	ZC3HAV1	0.281	inss_stage: 4s >= 4	4.62e-05	236
UKv4_A_23_P150446	EIF3M	kruskal	SCAF11	0.295	inss_stage: 4s >= 4	4.66e-05	236
UKv4_A_23_P150950	ZFC3H1	kruskal	TNRC6B	0.283	inss_stage: 4s >= 4	5.45e-05	236
UKv4_A_23_P151649	APEX1	kruskal	APEX1 DNA repair,drug target	-0.305	inss_stage: 4s < 4	5.47e-05	236
UKv4_A_23_P15218	ZNF768	kruskal	LSM7	-0.29	inss_stage: 4s < 4	5.58e-05	236
UKv4_A_23_P152284	SNRNP25	kruskal	SRRM1	0.292	inss_stage: 4s >= 4	5.58e-05	236
UKv4_A_23_P152487	KARS	kruskal	JAKMIP1	-0.254	inss_stage: 4s < 4	5.63e-05	236
UKv4_A_23_P152984	ALYREF	kruskal	PRPF40B	0.279	inss_stage: 4s >= 4	5.64e-05	236
UKv4_A_23_P153050	ALKBH5	kruskal	CLK4 kinase	0.29	inss_stage: 4s >= 4	5.68e-05	236
UKv4_A_23_P153383	RPL36	kruskal	NXF5 development	-0.253	inss_stage: 4s < 4	5.85e-05	236
UKv4_A_23_P153757	LSM4	kruskal	ZCCHC24	0.271	inss_stage: 4s >= 4	7.41e-05	236
UKv4_A_23_P154025	SSB	kruskal	FUBP1 transcription factor	-0.285	inss_stage: 4s < 4	7.8e-05	236
UKv4_A_23_P154675	SNRPB	kruskal	TRMT12	-0.291	inss_stage: 4s < 4	8.24e-05	236
UKv4_A_23_P15493	PTRH2	kruskal	RBMS3	0.276	inss_stage: 4s >= 4	8.25e-05	236
UKv4_A_23_P156209	ZNF622	kruskal	NONO DNA repair	-0.26	inss_stage: 4s < 4	8.26e-05	236
UKv4_A_23_P156471	CDC5L	kruskal	DDX26B	0.291	inss_stage: 4s >= 4	8.36e-05	236
UKv4_A_23_P15669	C17orf85	kruskal	DGCR8	0.289	inss_stage: 4s >= 4	8.72e-05	236
UKv4_A_23_P157072	EIF3B	kruskal	PRPF4B kinase	0.275	inss_stage: 4s >= 4	9.89e-05	236
UKv4_A_23_P157215	BZW2	kruskal	NUFIP2	0.267	inss_stage: 4s >= 4	0.000102	236
UKv4_A_23_P159305	TAF15	kruskal	TRNAU1AP	0.273	inss_stage: 4s >= 4	0.000102	236
UKv4_A_23_P160598	TOE1	kruskal	GPATCH8	0.276	inss_stage: 4s >= 4	0.000102	236
UKv4_A_23_P161125	MOV10	kruskal	MRPS17 membrane	-0.273	inss_stage: 4s < 4	0.000103	236
UKv4_A_23_P161918	CCDC86	kruskal	TDRD10	0.285	inss_stage: 4s >= 4	0.000104	236
UKv4_A_23_P162970	IPO4	kruskal	QKI development,differentiation	0.258	inss_stage: 4s >= 4	0.000109	236
UKv4_A_23_P163006	HNRNPC	kruskal	IMP3	-0.273	inss_stage: 4s < 4	0.000112	236
UKv4_A_23_P163025	RNASE3	kruskal	POLR2L	-0.28	inss_stage: 4s < 4	0.000113	236
UKv4_A_23_P163113	PRPF39	kruskal	CCDC59	-0.27	inss_stage: 4s < 4	0.000114	236
UKv4_A_23_P163440	MEX3B	kruskal	TDRD3	0.277	inss_stage: 4s >= 4	0.000115	236
UKv4_A_23_P163496	MRPS34	kruskal	MRPL51	-0.289	inss_stage: 4s < 4	0.000119	236
UKv4_A_23_P1638	RBM4B	0.0092	PARP12	0.279	inss_stage: 4s >= 4	0.000119	236
UKv4_A_23_P163814	ATXN1L	kruskal	RPS29	-0.267	inss_stage: 4s < 4	0.000122	236
UKv4_A_23_P163942	SUPT4H1	kruskal	MRPL23	-0.283	inss_stage: 4s < 4	0.000123	236
UKv4_A_23_P164237	UTP6	kruskal	EIF4G3	0.269	inss_stage: 4s >= 4	0.000124	236
UKv4_A_23_P164702	MRPL4	kruskal	DDX56	0.269	inss_stage: 4s >= 4	0.000131	236
UKv4_A_23_P164826	RNASEH2A	kruskal	AZGP1 membrane	0.343	inss_stage: 4s >= 4	0.000131	236
UKv4_A_23_P166716	TRMT10C	kruskal	DDX39A	-0.278	inss_stage: 4s < 4	0.000133	236
UKv4_A_23_P166807	PCBP4	kruskal	DIS3	0.263	inss_stage: 4s >= 4	0.000144	236
UKv4_A_23_P166826	DCP1A	kruskal	CAPRIN2	0.27	inss_stage: 4s >= 4	0.000144	236
UKv4_A_23_P167201	SEPSECS	kruskal	ESRP2	0.318	inss_stage: 4s >= 4	0.000149	236
UKv4_A_23_P16817	CLK1	kruskal	GAR1	-0.28	inss_stage: 4s < 4	0.00015	236
UKv4_A_23_P168898	RPS20	kruskal	EIF2AK3 apoptosis,development	0.26	inss_stage: 4s >= 4	0.00015	236
UKv4_A_23_P169007	NPM2	kruskal	TRMT10B	0.264	inss_stage: 4s >= 4	0.00015	236
UKv4_A_23_P169409	RPP25L	kruskal	FAM120A	0.274	inss_stage: 4s >= 4	0.000153	236
UKv4_A_23_P169470	CDK9	kruskal	TERT	-0.24	inss_stage: 4s < 4	0.00016	236
UKv4_A_23_P169529	AGFG1	kruskal	UNKL	0.271	inss_stage: 4s >= 4	0.000162	236
UKv4_A_23_P170352	MRPL12	kruskal	TRMU	0.256	inss_stage: 4s >= 4	0.000163	236
UKv4_A_23_P170820	PUM1	kruskal	NXF3	0.286	inss_stage: 4s >= 4	0.000163	236
UKv4_A_23_P171336	NXF3	kruskal	SMAD1 development,signal transduction	0.269	inss_stage: 4s >= 4	0.000164	236
UKv4_A_23_P18276	RBM5	kruskal	PURG	0.194	inss_stage: 4s >= 4	0.000165	236
UKv4_A_23_P18422	MRPL3	kruskal	SMG8	-0.275	inss_stage: 4s < 4	0.000166	236
UKv4_A_23_P18447	PPARGC1A	kruskal	MRPL38	-0.275	inss_stage: 4s < 4	0.00017	236
UKv4_A_23_P19084	HNRNPAB	kruskal	CELF2	0.269	inss_stage: 4s >= 4	0.00017	236
UKv4_A_23_P19576	SF3B5	kruskal	RPL38	-0.259	inss_stage: 4s < 4	0.000171	236
UKv4_A_23_P202071	CELF2	kruskal	SF3B2	-0.278	inss_stage: 4s < 4	0.000185	236
UKv4_A_23_P202496	NOC3L	kruskal	RPL39	-0.275	inss_stage: 4s < 4	0.000195	236
UKv4_A_23_P20384	LSM1	kruskal	TSEN54	-0.256	inss_stage: 4s < 4	0.000213	236
UKv4_A_23_P203841	BAZ2A	kruskal	SMAD7 signal transduction	0.269	inss_stage: 4s >= 4	0.000221	236
UKv4_A_23_P204119	RBM19	kruskal	RC3H1	0.252	inss_stage: 4s >= 4	0.000231	236
UKv4_A_23_P205531	RNASE4	kruskal	RUVBL1 cell cycle	-0.246	inss_stage: 4s < 4	0.000239	236
UKv4_A_23_P20683	KIAA0020	kruskal	RIOK3 kinase	0.251	inss_stage: 4s >= 4	0.000242	236
UKv4_A_23_P207400	BRCA1	kruskal	BYSL	-0.282	inss_stage: 4s < 4	0.000255	236
UKv4_A_23_P207967	CTIF	kruskal	NPM1 apoptosis,signal transduction	-0.274	inss_stage: 4s < 4	0.000257	236
UKv4_A_23_P208358	RPL28	kruskal	CPEB4	0.271	inss_stage: 4s >= 4	0.000257	236
UKv4_A_23_P20852	AUH	kruskal	MRPL17	-0.235	inss_stage: 4s < 4	0.00026	236
UKv4_A_23_P208850	RPS16	kruskal	ESRP1	0.256	inss_stage: 4s >= 4	0.000269	236
UKv4_A_23_P210747	TRMT6	kruskal	UPF3A	0.267	inss_stage: 4s >= 4	0.000269	236
UKv4_A_23_P210939	EIF6	kruskal	RPL35	-0.292	inss_stage: 4s < 4	0.00027	236
UKv4_A_23_P211099	SON	kruskal	CDK9 kinase	0.249	inss_stage: 4s >= 4	0.00027	236
UKv4_A_23_P211207	ADARB1		MTO1	0.255	inss_stage: 4s >= 4	0.00027	236
UKv4_A_23_P211806	LRRFIP2	kruskal	ZRANB2 transcription factor	0.247	inss_stage: 4s >= 4	0.000272	236
UKv4_A_23_P212639	TRA2B	kruskal	IFIT2	0.234	inss_stage: 4s >= 4	0.000289	236
UKv4_A_23_P212870	SMAD1	kruskal	SNRNP25	-0.245	inss_stage: 4s < 4	0.000294	236
UKv4_A_23_P21333	MKRN3	kruskal	PRPF8	0.239	inss_stage: 4s >= 4	0.000296	236
UKv4_A_23_P213441	UTP15	kruskal	MRPL52	-0.281	inss_stage: 4s < 4	0.000297	236
UKv4_A_23_P214211	RARS2	kruskal	TRMT44	0.25	inss_stage: 4s >= 4	0.000299	236
UKv4_A_23_P215875	DCAF13	kruskal	EXOSC6	0.267	inss_stage: 4s >= 4	0.0003	236
UKv4_A_23_P217609	RPL36A	kruskal	KARS drug target	-0.258	inss_stage: 4s < 4	0.000303	236
UKv4_A_23_P217797	DDX3Y	kruskal	PUM1	0.243	inss_stage: 4s >= 4	0.00032	236
UKv4_A_23_P218096	RBM26	kruskal	TFB1M	0.252	inss_stage: 4s >= 4	0.000335	236
UKv4_A_23_P218423	MRPL10	kruskal	MRPL27	-0.261	inss_stage: 4s < 4	0.000337	236
UKv4_A_23_P218492	ELAVL3	kruskal	TDRD9	0.197	inss_stage: 4s >= 4	0.000337	236
UKv4_A_23_P22473	FTSJ1	kruskal	LUC7L development	0.238	inss_stage: 4s >= 4	0.000337	236
UKv4_A_23_P23303	EXO1	kruskal	MKRN3	-0.241	inss_stage: 4s < 4	0.000366	236
UKv4_A_23_P23318	WDR3	kruskal	DQX1	0.232	inss_stage: 4s >= 4	0.000372	236
UKv4_A_23_P23356	RRP15	kruskal	DRG2 signal transduction	0.25	inss_stage: 4s >= 4	0.000379	236
UKv4_A_23_P24004	IFIT2	kruskal	U2AF1L4	0.246	inss_stage: 4s >= 4	0.000398	236
UKv4_A_23_P24192	RRP12	kruskal	ZC3H12C	0.227	inss_stage: 4s >= 4	0.0004	236
UKv4_A_23_P2423	MAGOHB		TRIM21	0.228	inss_stage: 4s >= 4	0.0004	236
UKv4_A_23_P24763	RPS13	kruskal	MRPL10	-0.261	inss_stage: 4s < 4	0.000414	236
UKv4_A_23_P250156	IGF2BP2	kruskal	MRPL47	-0.249	inss_stage: 4s < 4	0.000414	236
UKv4_A_23_P25019	PRIM1	kruskal	DAP3 apoptosis	-0.264	inss_stage: 4s < 4	0.000437	236
UKv4_A_23_P250714	EXOG	kruskal	PRPF19 DNA repair	-0.24	inss_stage: 4s < 4	0.000437	236
UKv4_A_23_P251505	NSUN5	kruskal	TXNL4A cell cycle	-0.282	inss_stage: 4s < 4	0.000447	236
UKv4_A_23_P251695	NXT1	kruskal	SUPT6H signal transduction,transcription factor	0.233	inss_stage: 4s >= 4	0.000449	236
UKv4_A_23_P251771	PUS1	kruskal	RPUSD3	0.264	inss_stage: 4s >= 4	0.00045	236
UKv4_A_23_P251937	CPEB4	kruskal	RBPMS2	0.252	inss_stage: 4s >= 4	0.000451	236
UKv4_A_23_P252155	STRBP	kruskal	TRMT1L	0.231	inss_stage: 4s >= 4	0.000458	236
UKv4_A_23_P252362	MRPS30	kruskal	GAPDH drug target	-0.227	inss_stage: 4s < 4	0.000463	236
UKv4_A_23_P252855	BRIX1	kruskal	THG1L	-0.256	inss_stage: 4s < 4	0.000467	236
UKv4_A_23_P255153	RBMX2	kruskal	CNOT7 signal transduction,transcription factor	-0.227	inss_stage: 4s < 4	0.000467	236
UKv4_A_23_P255569	DUS1L	kruskal	FAM98B	0.267	inss_stage: 4s >= 4	0.000481	236
UKv4_A_23_P255916	RPUSD3	kruskal	CTIF	0.235	inss_stage: 4s >= 4	0.000493	236
UKv4_A_23_P256624	DDX4	kruskal	TRMT10C	-0.262	inss_stage: 4s < 4	0.000509	236
UKv4_A_23_P257956	ILF2	kruskal	MRPS7	-0.257	inss_stage: 4s < 4	0.000511	236
UKv4_A_23_P258071	RNF113A		FBL	-0.24	inss_stage: 4s < 4	0.000513	236
UKv4_A_23_P258124	ZNF346	kruskal	INTS8	0.279	inss_stage: 4s >= 4	0.000514	236
UKv4_A_23_P258251	ENOX2	kruskal	PTRF membrane	0.242	inss_stage: 4s >= 4	0.000531	236
UKv4_A_23_P258321	MRPS17	kruskal	HEXIM2	-0.241	inss_stage: 4s < 4	0.000534	236
UKv4_A_23_P259127	ESRP1	kruskal	MAGOHB	-0.263	inss_stage: 4s < 4	0.000569	236
UKv4_A_23_P25929	EIF2B2	kruskal	RRP9	-0.25	inss_stage: 4s < 4	0.000596	236
UKv4_A_23_P26094	SLTM	kruskal	WDR36	0.226	inss_stage: 4s >= 4	0.000597	236
UKv4_A_23_P26336	ZC3H7A	kruskal	MRPS14	-0.279	inss_stage: 4s < 4	0.00062	236
UKv4_A_23_P27180	NSRP1	kruskal	SBDS	0.218	inss_stage: 4s >= 4	0.00065	236
UKv4_A_23_P27894	SAFB2	kruskal	RPP40	-0.253	inss_stage: 4s < 4	0.00066	236
UKv4_A_23_P28068	GTPBP3	kruskal	ENDOU	0.246	inss_stage: 4s >= 4	0.000673	236
UKv4_A_23_P2814	SMAD9		RNASE6	0.213	inss_stage: 4s >= 4	0.00068	236
UKv4_A_23_P28538	MRPS5	kruskal	APOBEC2	0.235	inss_stage: 4s >= 4	0.000683	236
UKv4_A_23_P28625	WDR12	kruskal	EIF4E	-0.243	inss_stage: 4s < 4	0.000697	236
UKv4_A_23_P28688	CPSF3	kruskal	RBM7 cell cycle	0.21	inss_stage: 4s >= 4	0.000704	236
UKv4_A_23_P29594	RPL39L	kruskal	SPEN signal transduction	0.244	inss_stage: 4s >= 4	0.000711	236
UKv4_A_23_P29803	POLR2H	kruskal	ZC3H12A	0.24	inss_stage: 4s >= 4	0.000715	236
UKv4_A_23_P29922	TLR3	kruskal	ZNF768	-0.213	inss_stage: 4s < 4	0.000722	236
UKv4_A_23_P29985	TRMT44	kruskal	MRPS5	0.238	inss_stage: 4s >= 4	0.000723	236
UKv4_A_23_P30069	DDX60L	kruskal	EIF3M	-0.262	inss_stage: 4s < 4	0.00073	236
UKv4_A_23_P300781	CNOT4	kruskal	EXOSC3	-0.259	inss_stage: 4s < 4	0.000752	236
UKv4_A_23_P301051	PAIP2B	kruskal	EEF1G	-0.227	inss_stage: 4s < 4	0.000755	236
UKv4_A_23_P301336	R3HCC1L	kruskal	ZC3HAV1L	0.237	inss_stage: 4s >= 4	0.000756	236
UKv4_A_23_P3014	RNASE6		AEN	-0.231	inss_stage: 4s < 4	0.000764	236
UKv4_A_23_P30377	DDX46	kruskal	DDX54 signal transduction	-0.218	inss_stage: 4s < 4	0.000782	236
UKv4_A_23_P306234	SNRNP48	kruskal	DDX6	0.174	inss_stage: 4s >= 4	0.000827	236
UKv4_A_23_P307430	LSM12	kruskal	IPO4	-0.234	inss_stage: 4s < 4	0.000895	236
UKv4_A_23_P309850	RPUSD2	kruskal	PPIL4	0.23	inss_stage: 4s >= 4	0.000904	236
UKv4_A_23_P310317	TCOF1	kruskal	ANG development,differentiation	0.335	inss_stage: 4s >= 4	0.000943	236
UKv4_A_23_P31654	RPL8	kruskal	CXorf23	0.255	inss_stage: 4s >= 4	0.000953	236
UKv4_A_23_P31833	EEF1D	kruskal	CWC25	0.244	inss_stage: 4s >= 4	0.000998	236
UKv4_A_23_P319792	XRN1	kruskal	DDX53	0.219	inss_stage: 4s >= 4	0.001	236
UKv4_A_23_P320095	CSDC2	kruskal	ZCCHC14	0.231	inss_stage: 4s >= 4	0.00101	236
UKv4_A_23_P323166	SRRM2	kruskal	ENOX2 membrane	0.223	inss_stage: 4s >= 4	0.00102	236
UKv4_A_23_P32463	EXOSC4		ZNF638	0.229	inss_stage: 4s >= 4	0.00103	236
UKv4_A_23_P326160	ZC3H12A	kruskal	TLR3 membrane,signal transduction	0.253	inss_stage: 4s >= 4	0.00104	236
UKv4_A_23_P326296	U2AF1L4	kruskal	SLIRP	-0.239	inss_stage: 4s < 4	0.00107	236
UKv4_A_23_P328323	RAVER2	kruskal	MTIF3	0.254	inss_stage: 4s >= 4	0.00107	236
UKv4_A_23_P33022	POLR2L	kruskal	SRSF8	0.259	inss_stage: 4s >= 4	0.00107	236
UKv4_A_23_P33045	RPL26	kruskal	GTPBP3	-0.193	inss_stage: 4s < 4	0.00108	236
UKv4_A_23_P331598	IPO7	kruskal	PCBP3	0.227	inss_stage: 4s >= 4	0.00109	236
UKv4_A_23_P331700	SRRM3	kruskal	ENDOG	-0.273	inss_stage: 4s < 4	0.0011	236
UKv4_A_23_P33433	MAZ	kruskal	POLR2A	0.227	inss_stage: 4s >= 4	0.0011	236
UKv4_A_23_P335452	ZCCHC24	kruskal	KHNYN	0.221	inss_stage: 4s >= 4	0.00112	236
UKv4_A_23_P335661	SAMD4A		BRCA1 DNA repair,apoptosis	-0.286	inss_stage: 4s < 4	0.00117	236
UKv4_A_23_P337849	CELF3	kruskal	NSUN5	0.225	inss_stage: 4s >= 4	0.0012	236
UKv4_A_23_P33809	IMP3	kruskal	ELAVL3 development,differentiation	0.227	inss_stage: 4s >= 4	0.0012	236
UKv4_A_23_P340722	XPOT	kruskal	PAPD4	0.24	inss_stage: 4s >= 4	0.0012	236
UKv4_A_23_P341325	RPL10L	kruskal	SNRPD3	-0.251	inss_stage: 4s < 4	0.00128	236
UKv4_A_23_P342000	RBM11	kruskal	TRMT13	0.217	inss_stage: 4s >= 4	0.00129	236
UKv4_A_23_P342668	AKAP17A	kruskal	ASH1L membrane	0.226	inss_stage: 4s >= 4	0.00131	236
UKv4_A_23_P34433	ZCCHC11	kruskal	RNASE11	0.211	inss_stage: 4s >= 4	0.00132	236
UKv4_A_23_P344853	WDR43	kruskal	CNBP transcription factor	-0.225	inss_stage: 4s < 4	0.0014	236
UKv4_A_23_P346302	ZMAT2	kruskal	MRPS21	-0.246	inss_stage: 4s < 4	0.00143	236
UKv4_A_23_P34877	RBM15	kruskal	EIF4E3	0.183	inss_stage: 4s >= 4	0.00143	236
UKv4_A_23_P349310	TNRC6A	kruskal	NOB1	-0.214	inss_stage: 4s < 4	0.00146	236
UKv4_A_23_P34956	MRPL9	kruskal	POLR2G	-0.254	inss_stage: 4s < 4	0.00148	236
UKv4_A_23_P350107	TRIM56	kruskal	DUS1L	-0.225	inss_stage: 4s < 4	0.00149	236
UKv4_A_23_P35030	CPSF3L	kruskal	PARP1 DNA repair,membrane	-0.251	inss_stage: 4s < 4	0.00151	236
UKv4_A_23_P351556	METTL3	kruskal	MAZ	-0.232	inss_stage: 4s < 4	0.00151	236
UKv4_A_23_P35412	IFIT3	kruskal	REXO1	0.235	inss_stage: 4s >= 4	0.00155	236
UKv4_A_23_P35591	EXOSC1	kruskal	SRRM2	0.229	inss_stage: 4s >= 4	0.00158	236
UKv4_A_23_P35645	RBM17	kruskal	RBMS2	0.245	inss_stage: 4s >= 4	0.00158	236
UKv4_A_23_P356565	RRP8	kruskal	TDRD6	0.223	inss_stage: 4s >= 4	0.00163	236
UKv4_A_23_P357101	APOBEC3F	kruskal	TRIT1	0.225	inss_stage: 4s >= 4	0.00164	236
UKv4_A_23_P36147	POLR2G	kruskal	XPO7	0.235	inss_stage: 4s >= 4	0.00164	236
UKv4_A_23_P362261	FDXACB1	kruskal	EIF6	-0.238	inss_stage: 4s < 4	0.00165	236
UKv4_A_23_P362824	CSTF1	kruskal	NPM2 development,differentiation	0.23	inss_stage: 4s >= 4	0.00168	236
UKv4_A_23_P363406	ANGEL1	kruskal	RRP8	-0.229	inss_stage: 4s < 4	0.00169	236
UKv4_A_23_P363647	DDX26B	kruskal	SRA1 apoptosis,differentiation	0.207	inss_stage: 4s >= 4	0.0017	236
UKv4_A_23_P364537	DDX51	kruskal	MRPS18C	-0.251	inss_stage: 4s < 4	0.00173	236
UKv4_A_23_P366453	KHDRBS2	kruskal	NIP7	-0.249	inss_stage: 4s < 4	0.00173	236
UKv4_A_23_P369983	FAM98C	kruskal	EIF1AD	-0.218	inss_stage: 4s < 4	0.00174	236
UKv4_A_23_P37005	MTRF1	kruskal	RARS2	0.207	inss_stage: 4s >= 4	0.00176	236
UKv4_A_23_P37111	DICER1	kruskal	WDR43	-0.203	inss_stage: 4s < 4	0.00183	236
UKv4_A_23_P371876	ALKBH8	kruskal	CSTF1	-0.234	inss_stage: 4s < 4	0.00185	236
UKv4_A_23_P373687	PUS10	kruskal	GPATCH4	-0.238	inss_stage: 4s < 4	0.00188	236
UKv4_A_23_P373799	CWC22	kruskal	GCFC2	0.232	inss_stage: 4s >= 4	0.00195	236
UKv4_A_23_P37584	MRPL46	kruskal	RPL36A	-0.215	inss_stage: 4s < 4	0.002	236
UKv4_A_23_P376759	DUSP11	kruskal	RPLP2	-0.222	inss_stage: 4s < 4	0.00201	236
UKv4_A_23_P377214	HEXIM2	kruskal	LRRFIP1	0.195	inss_stage: 4s >= 4	0.00202	236
UKv4_A_23_P377717	NOVA2	kruskal	MECP2	0.212	inss_stage: 4s >= 4	0.00202	236
UKv4_A_23_P379026	GTPBP2	kruskal	PPARGC1A differentiation,signal transduction	0.253	inss_stage: 4s >= 4	0.00204	236
UKv4_A_23_P379550	YARS	kruskal	ANGEL1	0.229	inss_stage: 4s >= 4	0.00212	236
UKv4_A_23_P380724	FASTKD5	kruskal	ERI3	0.215	inss_stage: 4s >= 4	0.00213	236
UKv4_A_23_P380998	R3HDM1	kruskal	MRPL9	-0.246	inss_stage: 4s < 4	0.0022	236
UKv4_A_23_P38115	CWC25	kruskal	SNRPB	-0.226	inss_stage: 4s < 4	0.0022	236
UKv4_A_23_P38254	ELAC2	kruskal	MRPL49	-0.248	inss_stage: 4s < 4	0.00228	236
UKv4_A_23_P383688	AARS2	kruskal	DNAAF2	-0.212	inss_stage: 4s < 4	0.00229	236
UKv4_A_23_P384635	DZIP1L	kruskal	NOA1	-0.214	inss_stage: 4s < 4	0.00233	236
UKv4_A_23_P385851	MBNL3	kruskal	SMAD6	0.218	inss_stage: 4s >= 4	0.00243	236
UKv4_A_23_P385938	PAN3	kruskal	MRPS24	-0.228	inss_stage: 4s < 4	0.00246	236
UKv4_A_23_P388993	ZC3H12C	kruskal	RPL41	-0.213	inss_stage: 4s < 4	0.00246	236
UKv4_A_23_P389907	ATXN2	kruskal	SETX differentiation	0.209	inss_stage: 4s >= 4	0.00246	236
UKv4_A_23_P390172	RNASEL	kruskal	PUS10	0.231	inss_stage: 4s >= 4	0.00247	236
UKv4_A_23_P39024	WDR83	kruskal	ZCCHC17	0.242	inss_stage: 4s >= 4	0.00247	236
UKv4_A_23_P39110	RUVBL2	kruskal	MOV10L1 development,differentiation	0.213	inss_stage: 4s >= 4	0.00248	236
UKv4_A_23_P391479	SRRM4	kruskal	MTRF1L	0.208	inss_stage: 4s >= 4	0.00251	236
UKv4_A_23_P39237	ZFP36	kruskal	RBMY1A1	0.217	inss_stage: 4s >= 4	0.00252	236
UKv4_A_23_P393425	PAPD4	kruskal	YBX2 differentiation	0.205	inss_stage: 4s >= 4	0.00266	236
UKv4_A_23_P394064	PTRF	kruskal	MRPL45	-0.227	inss_stage: 4s < 4	0.00276	236
UKv4_A_23_P394323	FAM98B	kruskal	NXF1	0.211	inss_stage: 4s >= 4	0.00277	236
UKv4_A_23_P3979	MRPS7		RNASE7	0.217	inss_stage: 4s >= 4	0.00282	236
UKv4_A_23_P398637	TRMT10A	kruskal	MRPS27	-0.22	inss_stage: 4s < 4	0.00283	236
UKv4_A_23_P400459	TRMT10B	kruskal	EXOSC5	-0.221	inss_stage: 4s < 4	0.00293	236
UKv4_A_23_P40078	XPO1	kruskal	XRN1 cell cycle	0.216	inss_stage: 4s >= 4	0.00294	236
UKv4_A_23_P40307	SNRPB2	kruskal	RAVER2	0.191	inss_stage: 4s >= 4	0.00296	236
UKv4_A_23_P404965	GNL1	kruskal	RPL8	-0.212	inss_stage: 4s < 4	0.00298	236
UKv4_A_23_P411922	PRPF40B	kruskal	IPO7 signal transduction	-0.172	inss_stage: 4s < 4	0.00299	236
UKv4_A_23_P413761	SRSF3	kruskal	UTP18	-0.219	inss_stage: 4s < 4	0.003	236
UKv4_A_23_P41470	DDX60	kruskal	SRSF3	-0.213	inss_stage: 4s < 4	0.00301	236
UKv4_A_23_P41514	ADAD1	kruskal	ELAVL2	0.198	inss_stage: 4s >= 4	0.00302	236
UKv4_A_23_P418451	PIH1D2	kruskal	U2AF1	-0.196	inss_stage: 4s < 4	0.00303	236
UKv4_A_23_P42507	PPIL4	kruskal	RBM20	-0.195	inss_stage: 4s < 4	0.0031	236
UKv4_A_23_P425073	RBMS2	kruskal	ZFP36 signal transduction	0.219	inss_stage: 4s >= 4	0.00313	236
UKv4_A_23_P425224	ZC3HAV1	kruskal	GNL3L	-0.188	inss_stage: 4s < 4	0.00314	236
UKv4_A_23_P427760	PIWIL4	kruskal	RPS16	-0.217	inss_stage: 4s < 4	0.00319	236
UKv4_A_23_P428738	ANG	kruskal	PCBP4 apoptosis	0.222	inss_stage: 4s >= 4	0.00346	236
UKv4_A_23_P42884	MRPS24	kruskal	POLR2F	-0.237	inss_stage: 4s < 4	0.00352	236
UKv4_A_23_P42997	CPSF4	kruskal	RNF17 differentiation	0.184	inss_stage: 4s >= 4	0.00352	236
UKv4_A_23_P43079	INTS8	kruskal	PTBP3	0.22	inss_stage: 4s >= 4	0.00352	236
UKv4_A_23_P431410	RBMS1	kruskal	LSM12	-0.188	inss_stage: 4s < 4	0.00353	236
UKv4_A_23_P432610	N4BP1	kruskal	ALKBH8	0.194	inss_stage: 4s >= 4	0.00355	236
UKv4_A_23_P436476	RBM34	kruskal	MRPL28	-0.215	inss_stage: 4s < 4	0.00357	236
UKv4_A_23_P43800	BOP1	kruskal	METTL2B	-0.198	inss_stage: 4s < 4	0.00364	236
UKv4_A_23_P43946	SARNP	kruskal	RPSA membrane,signal transduction	0.226	inss_stage: 4s >= 4	0.00367	236
UKv4_A_23_P44195	MSI2	kruskal	RPUSD2	-0.226	inss_stage: 4s < 4	0.00369	236
UKv4_A_23_P44956	RPL35A	kruskal	TNPO2	0.217	inss_stage: 4s >= 4	0.00374	236
UKv4_A_23_P45699	FUBP1	kruskal	RBM26	0.211	inss_stage: 4s >= 4	0.00384	236
UKv4_A_23_P46396	PTBP2	kruskal	NSRP1	0.208	inss_stage: 4s >= 4	0.0039	236
UKv4_A_23_P46812	CPEB3	kruskal	EFTUD2	-0.203	inss_stage: 4s < 4	0.00391	236
UKv4_A_23_P47691	TRIM21	kruskal	NXT2	-0.234	inss_stage: 4s < 4	0.00395	236
UKv4_A_23_P47788	METTL1	kruskal	SRSF1	-0.204	inss_stage: 4s < 4	0.00397	236
UKv4_A_23_P48416	DIS3	kruskal	RBM8A	-0.241	inss_stage: 4s < 4	0.00398	236
UKv4_A_23_P48596	RNASE1	kruskal	SLTM	0.216	inss_stage: 4s >= 4	0.00398	236
UKv4_A_23_P48977	MRPS11	kruskal	SPATS2	0.181	inss_stage: 4s >= 4	0.0041	236
UKv4_A_23_P4902	SNRNP70		MYEF2 differentiation,transcription factor	0.198	inss_stage: 4s >= 4	0.00414	236
UKv4_A_23_P49310	ERN2	kruskal	NOP10	-0.218	inss_stage: 4s < 4	0.00418	236
UKv4_A_23_P49517	SRSF1	kruskal	PTRHD1	-0.208	inss_stage: 4s < 4	0.00422	236
UKv4_A_23_P49768	MRPL27	kruskal	YTHDC2	0.22	inss_stage: 4s >= 4	0.00428	236
UKv4_A_23_P49865	YBX2	kruskal	RBM11	-0.22	inss_stage: 4s < 4	0.00432	236
UKv4_A_23_P502269	POLDIP3	kruskal	MRPL33	-0.211	inss_stage: 4s < 4	0.00436	236
UKv4_A_23_P502425	MRPL47	kruskal	PA2G4 transcription factor	-0.216	inss_stage: 4s < 4	0.00446	236
UKv4_A_23_P502930	FASTK	kruskal	FTSJ3	-0.193	inss_stage: 4s < 4	0.00448	236
UKv4_A_23_P50807	MRPS12		CLK3 kinase	0.2	inss_stage: 4s >= 4	0.00456	236
UKv4_A_23_P51781	TRNAU1AP	kruskal	GTPBP1 signal transduction	-0.207	inss_stage: 4s < 4	0.00462	236
UKv4_A_23_P52058	TARBP1	kruskal	PABPC1L	0.211	inss_stage: 4s >= 4	0.00463	236
UKv4_A_23_P52298	NPM3	kruskal	WBP4	0.189	inss_stage: 4s >= 4	0.00465	236
UKv4_A_23_P52738	DCPS	kruskal	RPL26	0.197	inss_stage: 4s >= 4	0.0047	236
UKv4_A_23_P52978	PRPF19	kruskal	EIF2AK2 apoptosis,cell cycle	0.174	inss_stage: 4s >= 4	0.00486	236
UKv4_A_23_P53011	TUT1	kruskal	APOBEC3F	0.192	inss_stage: 4s >= 4	0.00488	236
UKv4_A_23_P53788	MTIF3	kruskal	DDX60	0.208	inss_stage: 4s >= 4	0.00499	236
UKv4_A_23_P54477	NOP10	kruskal	MRPL42	-0.142	inss_stage: 4s < 4	0.005	236
UKv4_A_23_P54540	EIF2AK4	kruskal	RIOK2 kinase	-0.209	inss_stage: 4s < 4	0.00533	236
UKv4_A_23_P54834	NIP7	kruskal	ZMAT2	-0.219	inss_stage: 4s < 4	0.0054	236
UKv4_A_23_P54956	MRPL38	kruskal	TDRD7	0.217	inss_stage: 4s >= 4	0.00543	236
UKv4_A_23_P55073	NOL11	kruskal	RPP25L	-0.211	inss_stage: 4s < 4	0.00559	236
UKv4_A_23_P55091	FTSJ3	kruskal	TEX13A	0.208	inss_stage: 4s >= 4	0.00562	236
UKv4_A_23_P55190	EFTUD2	kruskal	PELO	0.179	inss_stage: 4s >= 4	0.0057	236
UKv4_A_23_P55518	SMAD7	kruskal	FARSA drug target	-0.207	inss_stage: 4s < 4	0.00575	236
UKv4_A_23_P55578	RIOK3	kruskal	SRSF10	0.2	inss_stage: 4s >= 4	0.00578	236
UKv4_A_23_P55904	NOM1	kruskal	EXOSC1	-0.193	inss_stage: 4s < 4	0.00588	236
UKv4_A_23_P56256	POLR2I	kruskal	CAPRIN1 membrane	-0.204	inss_stage: 4s < 4	0.00589	236
UKv4_A_23_P56567	GEMIN6	kruskal	RNASEL kinase	0.19	inss_stage: 4s >= 4	0.0059	236
UKv4_A_23_P56659	DQX1	kruskal	ADAD1	0.212	inss_stage: 4s >= 4	0.00602	236
UKv4_A_23_P57941	RBM6	kruskal	EIF1B	0.192	inss_stage: 4s >= 4	0.00608	236
UKv4_A_23_P58280	GAR1	kruskal	VARS2	0.208	inss_stage: 4s >= 4	0.00611	236
UKv4_A_23_P58353	HNRNPD	kruskal	RBM6	0.223	inss_stage: 4s >= 4	0.00624	236
UKv4_A_23_P58466	SMN2	kruskal	XPOT	-0.2	inss_stage: 4s < 4	0.00625	236
UKv4_A_23_P58529	DIMT1	kruskal	RNASE1 drug target	0.198	inss_stage: 4s >= 4	0.00628	236
UKv4_A_23_P58763	PELO	kruskal	HNRNPCL1	-0.184	inss_stage: 4s < 4	0.00632	236
UKv4_A_23_P58819	RANBP17	kruskal	XPO4	0.211	inss_stage: 4s >= 4	0.00638	236
UKv4_A_23_P59791	LUC7L2	kruskal	DCAF13	-0.209	inss_stage: 4s < 4	0.00639	236
UKv4_A_23_P59921	SUB1	kruskal	SNRPA	-0.196	inss_stage: 4s < 4	0.00655	236
UKv4_A_23_P60472	UBAP2	kruskal	PUS1	-0.184	inss_stage: 4s < 4	0.00681	236
UKv4_A_23_P61674	CLK4		HNRNPL	-0.185	inss_stage: 4s < 4	0.00682	236
UKv4_A_23_P62139	PQBP1	kruskal	CWC22	0.192	inss_stage: 4s >= 4	0.00683	236
UKv4_A_23_P62173	TEX13A	kruskal	PRKDC DNA repair,kinase	-0.183	inss_stage: 4s < 4	0.00692	236
UKv4_A_23_P62731	MRPS14	kruskal	EIF2B2 development,differentiation	-0.197	inss_stage: 4s < 4	0.00701	236
UKv4_A_23_P62868	EXOSC10	kruskal	NUPL2	0.18	inss_stage: 4s >= 4	0.00705	236
UKv4_A_23_P6303	U2AF1		RBMX	-0.194	inss_stage: 4s < 4	0.00706	236
UKv4_A_23_P63067	DAP3	kruskal	EEF1D signal transduction	-0.194	inss_stage: 4s < 4	0.00707	236
UKv4_A_23_P64083	SF3B2	kruskal	CRNKL1	0.194	inss_stage: 4s >= 4	0.00709	236
UKv4_A_23_P64689	PAN2	kruskal	RBM17	0.206	inss_stage: 4s >= 4	0.00718	236
UKv4_A_23_P6481	TNRC6B	5e-05	SWT1	0.195	inss_stage: 4s >= 4	0.00719	236
UKv4_A_23_P65472	RNASE11	kruskal	MRPL55	-0.215	inss_stage: 4s < 4	0.00725	236
UKv4_A_23_P65481	TEP1	kruskal	TOE1	0.203	inss_stage: 4s >= 4	0.00746	236
UKv4_A_23_P65741	DIS3L	kruskal	SF3B5	-0.198	inss_stage: 4s < 4	0.00764	236
UKv4_A_23_P65768	RSL24D1	kruskal	NUTF2	-0.178	inss_stage: 4s < 4	0.00768	236
UKv4_A_23_P65812	SMAD6	kruskal	TNRC6A	0.196	inss_stage: 4s >= 4	0.00793	236
UKv4_A_23_P66563	SMG8	kruskal	INTS3	0.19	inss_stage: 4s >= 4	0.00801	236
UKv4_A_23_P67771	BARD1	kruskal	UBAP2	0.186	inss_stage: 4s >= 4	0.00814	236
UKv4_A_23_P67992	C1D	kruskal	U2AF2	0.173	inss_stage: 4s >= 4	0.00815	236
UKv4_A_23_P6802	RRP9		USB1	-0.169	inss_stage: 4s < 4	0.00842	236
UKv4_A_23_P68155	IFIH1	kruskal	PDCD7 apoptosis	0.061	inss_stage: 4s >= 4	0.00843	236
UKv4_A_23_P6891	EIF1B		CPSF4	0.177	inss_stage: 4s >= 4	0.0086	236
UKv4_A_23_P70387	APOBEC2	kruskal	EIF3H	-0.19	inss_stage: 4s < 4	0.00878	236
UKv4_A_23_P70660	FAM46A	kruskal	KIAA0020	-0.206	inss_stage: 4s < 4	0.00903	236
UKv4_A_23_P7074	NOA1		FASTKD5 apoptosis	-0.188	inss_stage: 4s < 4	0.00907	236
UKv4_A_23_P70867	SBDS	kruskal	TARSL2	0.191	inss_stage: 4s >= 4	0.00916	236
UKv4_A_23_P70991	AIMP2	kruskal	RBM4B	-0.203	inss_stage: 4s < 4	0.0092	236
UKv4_A_23_P71270	AZGP1	kruskal	RNPC3	0.186	inss_stage: 4s >= 4	0.00928	236
UKv4_A_23_P71316	RBPMS	kruskal	MRPS11	-0.193	inss_stage: 4s < 4	0.00929	236
UKv4_A_23_P71981	ERAL1	kruskal	RPL18	-0.139	inss_stage: 4s < 4	0.00929	236
UKv4_A_23_P73837	TLR8	kruskal	DHX34	0.196	inss_stage: 4s >= 4	0.00929	236
UKv4_A_23_P74380	WARS2	kruskal	MRPS6	-0.207	inss_stage: 4s < 4	0.0093	236
UKv4_A_23_P74914	URB2	kruskal	DDX60L	0.182	inss_stage: 4s >= 4	0.00931	236
UKv4_A_23_P76841	NGDN	kruskal	PURB apoptosis,differentiation	0.186	inss_stage: 4s >= 4	0.00937	236
UKv4_A_23_P77079	MYEF2	kruskal	PQBP1	-0.199	inss_stage: 4s < 4	0.00942	236
UKv4_A_23_P78664	DDX39A	kruskal	WARS2 development,differentiation	0.166	inss_stage: 4s >= 4	0.00947	236
UKv4_A_23_P78685	FARSA	kruskal	PUS7	-0.179	inss_stage: 4s < 4	0.0095	236
UKv4_A_23_P78888	FBL	kruskal	PTCD1	-0.21	inss_stage: 4s < 4	0.00952	236
UKv4_A_23_P80129	RRP1	kruskal	DZIP1 development,differentiation	0.193	inss_stage: 4s >= 4	0.00973	236
UKv4_A_23_P80321	POLR2F	kruskal	NANOS3 development,differentiation	0.209	inss_stage: 4s >= 4	0.00974	236
UKv4_A_23_P80389	TRMU	kruskal	RNASE3 drug target	0.2	inss_stage: 4s >= 4	0.00979	236
UKv4_A_23_P81121	EXOSC9	kruskal	AGFG1	0.195	inss_stage: 4s >= 4	0.00981	236
UKv4_A_23_P81212	MRPS18C	kruskal	UTP6	0.174	inss_stage: 4s >= 4	0.00982	236
UKv4_A_23_P82128	RPS12	kruskal	EEF1B2	-0.183	inss_stage: 4s < 4	0.00991	236
UKv4_A_23_P82478	PUS7	kruskal	CNOT4	0.187	inss_stage: 4s >= 4	0.00996	236
UKv4_A_23_P82823	PINX1	kruskal	TIPARP	0.168	inss_stage: 4s >= 4	0.00998	236
UKv4_A_23_P82913	TRMT12	kruskal	LSM11	-0.18	inss_stage: 4s < 4	0.00999	236
UKv4_A_23_P83266	ENDOG	kruskal	THOC3	-0.21	inss_stage: 4s < 4	0.01	236
UKv4_A_23_P8339	MRPL18		SECISBP2	0.163	inss_stage: 4s >= 4	0.01	236
UKv4_A_23_P84047	PABPC5	kruskal	ERI2	0.18	inss_stage: 4s >= 4	0.01	236
UKv4_A_23_P84651	CNBP	kruskal	TLR8 drug target,membrane	0.197	inss_stage: 4s >= 4	0.01	236
UKv4_A_23_P86731	ZNF239	kruskal	LUZP4	0.205	inss_stage: 4s >= 4	0.01	236
UKv4_A_23_P86884	SART1	kruskal	EIF3B	-0.202	inss_stage: 4s < 4	0.011	236
UKv4_A_23_P87141	CLP1	kruskal	KIAA0391	-0.197	inss_stage: 4s < 4	0.011	236
UKv4_A_23_P87257	MRPL17	kruskal	MRPL30	-0.193	inss_stage: 4s < 4	0.011	236
UKv4_A_23_P87329	NAT10	kruskal	AKAP1 membrane	-0.181	inss_stage: 4s < 4	0.011	236
UKv4_A_23_P87532	CAPRIN2	kruskal	DHX37	-0.173	inss_stage: 4s < 4	0.011	236
UKv4_A_23_P87759	EMG1	kruskal	HABP4	0.163	inss_stage: 4s >= 4	0.011	236
UKv4_A_23_P87839	SCAF11	kruskal	CSDC2	0.193	inss_stage: 4s >= 4	0.011	236
UKv4_A_23_P88819	MVP	kruskal	ERN2 apoptosis,kinase	0.2	inss_stage: 4s >= 4	0.011	236
UKv4_A_23_P89910	GEMIN7	kruskal	ZFP36L2 transcription factor	0.202	inss_stage: 4s >= 4	0.011	236
UKv4_A_23_P90155	PIH1D1	kruskal	MAK16	-0.189	inss_stage: 4s < 4	0.012	236
UKv4_A_23_P90463	LSM7	kruskal	PAIP2B	-0.189	inss_stage: 4s < 4	0.012	236
UKv4_A_23_P9061	EIF3H		CPSF3	-0.188	inss_stage: 4s < 4	0.012	236
UKv4_A_23_P91019	PRKRA	kruskal	GNL3	-0.179	inss_stage: 4s < 4	0.012	236
UKv4_A_23_P93499	TFB1M	kruskal	RUVBL2 DNA repair	-0.179	inss_stage: 4s < 4	0.012	236
UKv4_A_23_P94571	ELAVL2	kruskal	NOL11	-0.172	inss_stage: 4s < 4	0.012	236
UKv4_A_23_P94683	NFX1	kruskal	DDX50	-0.169	inss_stage: 4s < 4	0.012	236
UKv4_A_23_P95879	RPL38	kruskal	EEF2	-0.151	inss_stage: 4s < 4	0.012	236
UKv4_A_23_P9603	PRKDC		RPL28	-0.143	inss_stage: 4s < 4	0.012	236
UKv4_A_23_P96420	RBMX	kruskal	EXOSC8	0.072	inss_stage: 4s >= 4	0.012	236
UKv4_A_23_P96611	LUZP4	kruskal	FASTK apoptosis,kinase	0.158	inss_stage: 4s >= 4	0.012	236
UKv4_A_23_P96777	LRRC47	kruskal	DIS3L	0.159	inss_stage: 4s >= 4	0.012	236
UKv4_A_23_P96936	SWT1	kruskal	SURF6	0.159	inss_stage: 4s >= 4	0.012	236
UKv4_A_23_P96976	ZCCHC17	kruskal	RNASET2	0.166	inss_stage: 4s >= 4	0.012	236
UKv4_A_23_P97157	IPO9	kruskal	DDX59	0.167	inss_stage: 4s >= 4	0.012	236
UKv4_A_23_P97265	GPATCH4	kruskal	AFF4 transcription factor	0.168	inss_stage: 4s >= 4	0.012	236
UKv4_A_23_P98402	SIDT2	kruskal	ELAC2	0.172	inss_stage: 4s >= 4	0.012	236
UKv4_A_23_P99138	MRPL51	kruskal	NYNRIN	0.188	inss_stage: 4s >= 4	0.012	236
UKv4_A_23_P99303	SPATS2	kruskal	IFIH1 apoptosis	0.19	inss_stage: 4s >= 4	0.012	236
UKv4_A_23_P99373	RNF17	kruskal	ENOX1	0.194	inss_stage: 4s >= 4	0.012	236
UKv4_A_23_P99473	UPF3A	kruskal	DCPS	0.229	inss_stage: 4s >= 4	0.012	236
UKv4_A_23_P99540	ZFP36L1	kruskal	URB2	-0.184	inss_stage: 4s < 4	0.013	236
UKv4_A_23_P99762	RBM25	kruskal	DDX3Y	0.115	inss_stage: 4s >= 4	0.013	236
UKv4_A_24_P100351	GNL3L	kruskal	ZFR2	0.163	inss_stage: 4s >= 4	0.013	236
UKv4_A_24_P105283	SFPQ	kruskal	LRRC47	0.172	inss_stage: 4s >= 4	0.013	236
UKv4_A_24_P106357	WDR36	kruskal	NOC3L	-0.185	inss_stage: 4s < 4	0.014	236
UKv4_A_24_P107941	USB1	kruskal	STRBP development,differentiation	-0.179	inss_stage: 4s < 4	0.014	236
UKv4_A_24_P11131	SRRM1	kruskal	TDRD12	0.113	inss_stage: 4s >= 4	0.014	236
UKv4_A_24_P113521	DGCR8	kruskal	RPS12	0.173	inss_stage: 4s >= 4	0.014	236
UKv4_A_24_P119482	SECISBP2	kruskal	TRDMT1	0.2	inss_stage: 4s >= 4	0.014	236
UKv4_A_24_P12932	MRPS16	kruskal	RRP15	-0.189	inss_stage: 4s < 4	0.015	236
UKv4_A_24_P134074	RPS19	kruskal	DDX21	-0.17	inss_stage: 4s < 4	0.015	236
UKv4_A_24_P138556	EIF2S1	kruskal	METTL1	-0.145	inss_stage: 4s < 4	0.015	236
UKv4_A_24_P142228	RPL13	kruskal	CRYZ drug target	0.195	inss_stage: 4s >= 4	0.015	236
UKv4_A_24_P146603	DDX21	kruskal	METTL3	0.2	inss_stage: 4s >= 4	0.015	236
UKv4_A_24_P148811	RUVBL1	kruskal	WDR12	-0.183	inss_stage: 4s < 4	0.016	236
UKv4_A_24_P151727	NONO	kruskal	PRIM1	-0.172	inss_stage: 4s < 4	0.016	236
UKv4_A_24_P151959	FBXO17	kruskal	SNRPB2	-0.153	inss_stage: 4s < 4	0.016	236
UKv4_A_24_P154948	GARS	kruskal	LENG9	0.195	inss_stage: 4s >= 4	0.016	236
UKv4_A_24_P156886	DDX59	kruskal	ILF2	-0.224	inss_stage: 4s < 4	0.017	236
UKv4_A_24_P159036	RPL36AL	kruskal	SARNP	-0.202	inss_stage: 4s < 4	0.017	236
UKv4_A_24_P159181	PDCD7	kruskal	EMG1	-0.191	inss_stage: 4s < 4	0.017	236
UKv4_A_24_P16036	PTRHD1	kruskal	RPS7	-0.185	inss_stage: 4s < 4	0.017	236
UKv4_A_24_P160440	MRPL55	kruskal	BRIX1	-0.174	inss_stage: 4s < 4	0.017	236
UKv4_A_24_P170763	KHNYN	kruskal	TAF15	0.168	inss_stage: 4s >= 4	0.017	236
UKv4_A_24_P174341	CCNT2		IPO13	0.175	inss_stage: 4s >= 4	0.017	236
UKv4_A_24_P175909	MARS	kruskal	RNASE2	0.183	inss_stage: 4s >= 4	0.017	236
UKv4_A_24_P178106	YTHDC2	kruskal	SNRNP48	0.188	inss_stage: 4s >= 4	0.017	236
UKv4_A_24_P188447	ELAVL4	kruskal	MSI2	-0.168	inss_stage: 4s < 4	0.018	236
UKv4_A_24_P188941	NPM1	kruskal	TSR1	0.152	inss_stage: 4s >= 4	0.018	236
UKv4_A_24_P190877	TRMT1L	kruskal	RBM19	0.178	inss_stage: 4s >= 4	0.018	236
UKv4_A_24_P191833	SREK1	kruskal	PRPF39	0.195	inss_stage: 4s >= 4	0.018	236
UKv4_A_24_P201491	MRPL49	kruskal	RRP1	-0.159	inss_stage: 4s < 4	0.019	236
UKv4_A_24_P201879	UTP14C	kruskal	FAM98C	0.172	inss_stage: 4s >= 4	0.019	236
UKv4_A_24_P205230	RNASEK	kruskal	PRKRA apoptosis,development	0.181	inss_stage: 4s >= 4	0.019	236
UKv4_A_24_P20753	SRA1	kruskal	RSL24D1	-0.183	inss_stage: 4s < 4	0.02	236
UKv4_A_24_P20814	KHDC1	kruskal	SRSF9	-0.167	inss_stage: 4s < 4	0.02	236
UKv4_A_24_P211151	EXOSC5	kruskal	RTF1	0.151	inss_stage: 4s >= 4	0.02	236
UKv4_A_24_P21447	SURF6	kruskal	IPO9	0.159	inss_stage: 4s >= 4	0.02	236
UKv4_A_24_P215407	DDX6	kruskal	C1D	0.161	inss_stage: 4s >= 4	0.02	236
UKv4_A_24_P229714	TDRD6	kruskal	SMAD5 development,signal transduction	0.161	inss_stage: 4s >= 4	0.02	236
UKv4_A_24_P23034	ZNFX1	kruskal	FCF1	0.163	inss_stage: 4s >= 4	0.02	236
UKv4_A_24_P237486	MECP2	kruskal	ZNF622	-0.167	inss_stage: 4s < 4	0.021	236
UKv4_A_24_P241276	EXOSC8	kruskal	RPL36	-0.165	inss_stage: 4s < 4	0.021	236
UKv4_A_24_P242299	ZRANB2	kruskal	ERAL1	0.046	inss_stage: 4s >= 4	0.021	236
UKv4_A_24_P250335	SNRPA	kruskal	ADAR	0.138	inss_stage: 4s >= 4	0.021	236
UKv4_A_24_P251841	SETD7	kruskal	PIH1D2	0.154	inss_stage: 4s >= 4	0.021	236
UKv4_A_24_P252705	TRDMT1	kruskal	ZFC3H1	0.166	inss_stage: 4s >= 4	0.021	236
UKv4_A_24_P257759	RP9	kruskal	SMN2	-0.176	inss_stage: 4s < 4	0.022	236
UKv4_A_24_P285480	MRPL33	kruskal	NOVA2	-0.167	inss_stage: 4s < 4	0.022	236
UKv4_A_24_P286079	AFF4	kruskal	FXR1 apoptosis,development	-0.156	inss_stage: 4s < 4	0.022	236
UKv4_A_24_P286465	PURB	kruskal	DDX39B	0.145	inss_stage: 4s >= 4	0.022	236
UKv4_A_24_P299996	SHQ1	kruskal	ALKBH5 membrane	0.147	inss_stage: 4s >= 4	0.022	236
UKv4_A_24_P302695	MRPL30	kruskal	TEFM	0.151	inss_stage: 4s >= 4	0.022	236
UKv4_A_24_P3140	ZNF638		GNL1 signal transduction	0.155	inss_stage: 4s >= 4	0.022	236
UKv4_A_24_P316939	LRRFIP1	kruskal	HNRNPK	0.156	inss_stage: 4s >= 4	0.022	236
UKv4_A_24_P317874	KIN	kruskal	RNMT	0.162	inss_stage: 4s >= 4	0.022	236
UKv4_A_24_P321369	SRPR	kruskal	TEP1	0.18	inss_stage: 4s >= 4	0.022	236
UKv4_A_24_P32672	MRPL11	kruskal	RBM15	0.191	inss_stage: 4s >= 4	0.022	236
UKv4_A_24_P333716	XPO4	kruskal	WDR3	-0.186	inss_stage: 4s < 4	0.023	236
UKv4_A_24_P341504	RNPC3	kruskal	RPL10L	-0.177	inss_stage: 4s < 4	0.023	236
UKv4_A_24_P345193	SPEN	kruskal	FTSJ1	-0.151	inss_stage: 4s < 4	0.023	236
UKv4_A_24_P346181	FAM120B	kruskal	DDX46	0.163	inss_stage: 4s >= 4	0.023	236
UKv4_A_24_P347310	ENDOU	kruskal	DCP1A	0.164	inss_stage: 4s >= 4	0.023	236
UKv4_A_24_P349616	UBTF	kruskal	IFIT3	0.165	inss_stage: 4s >= 4	0.023	236
UKv4_A_24_P352445	MRPL42	kruskal	ZNF239	-0.168	inss_stage: 4s < 4	0.024	236
UKv4_A_24_P357406	RBMY1A1	kruskal	PINX1 cell cycle	-0.152	inss_stage: 4s < 4	0.024	236
UKv4_A_24_P359117	GPATCH8	kruskal	SRPR membrane	0.139	inss_stage: 4s >= 4	0.024	236
UKv4_A_24_P360269	RNASET2	kruskal	SON apoptosis	0.162	inss_stage: 4s >= 4	0.024	236
UKv4_A_24_P362317	ADAR	kruskal	SCAF8	0.171	inss_stage: 4s >= 4	0.024	236
UKv4_A_24_P365048	TEFM	kruskal	XRCC6 DNA repair	-0.174	inss_stage: 4s < 4	0.025	236
UKv4_A_24_P366670	AFF3		PSMA1	-0.17	inss_stage: 4s < 4	0.025	236
UKv4_A_24_P367666	ASH1L	kruskal	RPL36AL	-0.162	inss_stage: 4s < 4	0.025	236
UKv4_A_24_P371758	MRPL36	kruskal	PIH1D1	-0.155	inss_stage: 4s < 4	0.025	236
UKv4_A_24_P372123	METTL2B	kruskal	RPS5	-0.154	inss_stage: 4s < 4	0.025	236
UKv4_A_24_P379450	NOL9	kruskal	EIF2S1	-0.145	inss_stage: 4s < 4	0.025	236
UKv4_A_24_P380919	HNRNPK	kruskal	MRPL18	-0.089	inss_stage: 4s < 4	0.025	236
UKv4_A_24_P390070	SRSF9	kruskal	DICER1 development,differentiation	0.156	inss_stage: 4s >= 4	0.025	236
UKv4_A_24_P390403	RTF1	kruskal	MBNL3 development	0.202	inss_stage: 4s >= 4	0.025	236
UKv4_A_24_P396557	TRMT13	kruskal	RRP1B	-0.168	inss_stage: 4s < 4	0.026	236
UKv4_A_24_P405430	TIA1		UTP15	-0.164	inss_stage: 4s < 4	0.026	236
UKv4_A_24_P409330	MRPL52	kruskal	RPL35A	-0.162	inss_stage: 4s < 4	0.026	236
UKv4_A_24_P414332	AFF1	kruskal	HNRNPAB	-0.158	inss_stage: 4s < 4	0.026	236
UKv4_A_24_P44891	TNPO2	kruskal	RPS11	-0.152	inss_stage: 4s < 4	0.026	236
UKv4_A_24_P453497	RBM20	kruskal	BOP1	-0.144	inss_stage: 4s < 4	0.026	236
UKv4_A_24_P48408	RNMT	kruskal	SRP68	-0.143	inss_stage: 4s < 4	0.026	236
UKv4_A_24_P548354	RPS29	kruskal	NFX1 transcription factor	0.162	inss_stage: 4s >= 4	0.026	236
UKv4_A_24_P56317	MBNL2	kruskal	KHDRBS2	-0.186	inss_stage: 4s < 4	0.027	236
UKv4_A_24_P56407	FCF1	kruskal	MRPL36	-0.168	inss_stage: 4s < 4	0.027	236
UKv4_A_24_P63608	NHP2	kruskal	ZC3H7A	0.178	inss_stage: 4s >= 4	0.027	236
UKv4_A_24_P63969	NAA38	kruskal	CARS2 drug target	0.161	inss_stage: 4s >= 4	0.028	236
UKv4_A_24_P66672	INTS1	kruskal	HDLBP membrane	0.17	inss_stage: 4s >= 4	0.028	236
UKv4_A_24_P703830	NANOS3	kruskal	SMG1 DNA repair,kinase	-0.203	inss_stage: 4s < 4	0.029	236
UKv4_A_24_P737451	MTERFD2	kruskal	ZNFX1 transcription factor	0.149	inss_stage: 4s >= 4	0.029	236
UKv4_A_24_P74160	SNRPD2	kruskal	RANBP2	0.152	inss_stage: 4s >= 4	0.029	236
UKv4_A_24_P75376	ZC3H13	kruskal	MARS	0.155	inss_stage: 4s >= 4	0.029	236
UKv4_A_24_P767422	HNRNPCL1	kruskal	DUSP11	0.159	inss_stage: 4s >= 4	0.029	236
UKv4_A_24_P82135	SECISBP2		ATXN2 differentiation	0.171	inss_stage: 4s >= 4	0.029	236
UKv4_A_24_P841677	CXorf23	kruskal	MEX3B	0.174	inss_stage: 4s >= 4	0.029	236
UKv4_A_24_P87763	EEF2	kruskal	CELF3	0.141	inss_stage: 4s >= 4	0.03	236
UKv4_A_24_P886040	DCP2	kruskal	RP9	0.144	inss_stage: 4s >= 4	0.03	236
UKv4_A_24_P916614	PTBP3	kruskal	YARS apoptosis,drug target	0.155	inss_stage: 4s >= 4	0.03	236
UKv4_A_24_P91916	NXT2	kruskal	RPL3L	0.162	inss_stage: 4s >= 4	0.03	236
UKv4_A_24_P921144	NUFIP2	kruskal	HNRNPH3	0.163	inss_stage: 4s >= 4	0.03	236
UKv4_A_24_P92183	PABPC1L	kruskal	TARDBP cell cycle,transcription factor	-0.171	inss_stage: 4s < 4	0.031	236
UKv4_A_24_P923142	ZC3HAV1L	kruskal	HNRNPD	-0.163	inss_stage: 4s < 4	0.031	236
UKv4_A_24_P925611	DDX17		SFPQ DNA repair	0.149	inss_stage: 4s >= 4	0.031	236
UKv4_A_24_P929807	TRA2A	kruskal	UTP14C cell cycle,development	0.153	inss_stage: 4s >= 4	0.031	236
UKv4_A_24_P935622	DDX56	kruskal	AARS2 drug target	0.155	inss_stage: 4s >= 4	0.031	236
UKv4_A_24_P940426	QKI	kruskal	SAFB2	0.162	inss_stage: 4s >= 4	0.031	236
UKv4_A_24_P941336	TSR1	kruskal	EXOG	0.169	inss_stage: 4s >= 4	0.031	236
UKv4_A_24_P941505	FAM120A	kruskal	EIF4A3	-0.166	inss_stage: 4s < 4	0.032	236
UKv4_A_24_P941787	PRPF4B	kruskal	RPS20	-0.153	inss_stage: 4s < 4	0.032	236
UKv4_A_24_P944040	RRP1B	kruskal	ELAVL1 development	-0.139	inss_stage: 4s < 4	0.032	236
UKv4_A_24_P945312	PAPOLB		GARS drug target	0.137	inss_stage: 4s >= 4	0.032	236
UKv4_A_24_P95273	SETX	kruskal	RNASEK	0.138	inss_stage: 4s >= 4	0.032	236
UKv4_A_24_P99679	POLR2A	kruskal	SSB	0.154	inss_stage: 4s >= 4	0.032	236
UKv4_A_32_P109572	HNRNPL	kruskal	R3HCC1L	0.155	inss_stage: 4s >= 4	0.032	236
UKv4_A_32_P109704	SFSWAP		DCP2	0.162	inss_stage: 4s >= 4	0.032	236
UKv4_A_32_P11181	PA2G4	kruskal	ATXN1L	0.164	inss_stage: 4s >= 4	0.032	236
UKv4_A_32_P11471	FAU	kruskal	TRA2B	-0.149	inss_stage: 4s < 4	0.033	236
UKv4_A_32_P119348	BICC1	kruskal	MRPL46	-0.147	inss_stage: 4s < 4	0.033	236
UKv4_A_32_P132438	AKAP1	kruskal	TRMT10A	0.148	inss_stage: 4s >= 4	0.033	236
UKv4_A_32_P156237	RPSA	kruskal	KHDC1	0.164	inss_stage: 4s >= 4	0.033	236
UKv4_A_32_P168886	EIF4H	kruskal	NOL9	0.101	inss_stage: 4s >= 4	0.034	236
UKv4_A_32_P170888	CNOT7	kruskal	APOBEC3G	0.154	inss_stage: 4s >= 4	0.034	236
UKv4_A_32_P1712	RNASE2	0.01728	AIMP2	-0.168	inss_stage: 4s < 4	0.035	236
UKv4_A_32_P17635	SRSF8	kruskal	NAA38	-0.165	inss_stage: 4s < 4	0.036	236
UKv4_A_32_P184727	KPNB1	kruskal	GEMIN7	-0.131	inss_stage: 4s < 4	0.036	236
UKv4_A_32_P187617	TDRD3	kruskal	FDXACB1	0.142	inss_stage: 4s >= 4	0.036	236
UKv4_A_32_P200165	ELAVL1	kruskal	YTHDF2	0.149	inss_stage: 4s >= 4	0.036	236
UKv4_A_32_P201279	FRG1B	kruskal	SREK1	0.149	inss_stage: 4s >= 4	0.036	236
UKv4_A_32_P20691	CLK3	kruskal	TRMT6	-0.152	inss_stage: 4s < 4	0.037	236
UKv4_A_32_P208350	TDRD9	kruskal	SEPSECS drug target	0.139	inss_stage: 4s >= 4	0.037	236
UKv4_A_32_P208654	PIWIL2	kruskal	RPL39L	-0.091	inss_stage: 4s < 4	0.038	236
UKv4_A_32_P220307	RPL39	kruskal	XPO1 membrane	0.148	inss_stage: 4s >= 4	0.038	236
UKv4_A_32_P225355	CPEB2	kruskal	AKAP17A	0.157	inss_stage: 4s >= 4	0.038	236
UKv4_A_32_P228618	RBMS3	kruskal	DDX51	0.162	inss_stage: 4s >= 4	0.038	236
UKv4_A_32_P232192	DIS3L2	kruskal	LARP4	0.163	inss_stage: 4s >= 4	0.038	236
UKv4_A_32_P234935	TARDBP	kruskal	BARD1 apoptosis	0.164	inss_stage: 4s >= 4	0.038	236
UKv4_A_32_P235128	RPL37	kruskal	SNRPG	-0.167	inss_stage: 4s < 4	0.039	236
UKv4_A_32_P235872	CAPRIN1	kruskal	IREB2	0.152	inss_stage: 4s >= 4	0.039	236
UKv4_A_32_P31633	SF3B1	kruskal	RBM15B	-0.171	inss_stage: 4s < 4	0.04	236
UKv4_A_32_P36192	DDX39B	kruskal	CNOT8 transcription factor	0.14	inss_stage: 4s >= 4	0.04	236
UKv4_A_32_P36942	TYW5	kruskal	MRPS30 apoptosis	-0.149	inss_stage: 4s < 4	0.041	236
UKv4_A_32_P379105	DDX53	kruskal	RRP12 membrane	-0.146	inss_stage: 4s < 4	0.041	236
UKv4_A_32_P390781	REXO1	kruskal	PHRF1	-0.13	inss_stage: 4s < 4	0.041	236
UKv4_A_32_P402521	PRPF8	kruskal	CLP1	-0.181	inss_stage: 4s < 4	0.042	236
UKv4_A_32_P41405	THOC3	kruskal	RBM34	-0.151	inss_stage: 4s < 4	0.042	236
UKv4_A_32_P41662	MTRF1L	kruskal	RPS19	-0.138	inss_stage: 4s < 4	0.042	236
UKv4_A_32_P430359	DDX54	kruskal	UBTF	-0.123	inss_stage: 4s < 4	0.042	236
UKv4_A_32_P43217	PSMA6	kruskal	POLDIP3	0.162	inss_stage: 4s >= 4	0.042	236
UKv4_A_32_P45493	SRSF10	kruskal	DDX1 development	-0.192	inss_stage: 4s < 4	0.043	236
UKv4_A_32_P46510	ZC3H6	kruskal	MRPL4	-0.169	inss_stage: 4s < 4	0.043	236
UKv4_A_32_P46526	LSM11	kruskal	NKRF	-0.142	inss_stage: 4s < 4	0.043	236
UKv4_A_32_P493225	LENG9	kruskal	RPL13	-0.117	inss_stage: 4s < 4	0.043	236
UKv4_A_32_P49616	EEF1B2	kruskal	FAM46A	0.149	inss_stage: 4s >= 4	0.043	236
UKv4_A_32_P496952	RBM43	kruskal	WDR83	-0.171	inss_stage: 4s < 4	0.044	236
UKv4_A_32_P506600	RAN	kruskal	RPL37	-0.145	inss_stage: 4s < 4	0.044	236
UKv4_A_32_P55462	ZFR2	kruskal	TCOF1 development	-0.139	inss_stage: 4s < 4	0.044	236
UKv4_A_32_P749354	EIF1AD	kruskal	POLR2I	-0.135	inss_stage: 4s < 4	0.044	236
UKv4_A_32_P79366	HABP4	kruskal	MVP	0.147	inss_stage: 4s >= 4	0.044	236
UKv4_A_32_P7974	TDRD10	0.0001	SHQ1	-0.148	inss_stage: 4s < 4	0.045	236
UKv4_A_32_P79763	TDRD12	kruskal	FBXO17	0.145	inss_stage: 4s >= 4	0.045	236
UKv4_A_32_P8120	GNL3	0.01216	RPS3	-0.14	inss_stage: 4s < 4	0.046	236
UKv4_A_32_P81335	LARP4	kruskal	KIN	-0.13	inss_stage: 4s < 4	0.046	236
UKv4_A_32_P8251	PHRF1	0.04094	RANBP17	0.14	inss_stage: 4s >= 4	0.046	236
UKv4_A_32_P85230	AEN	kruskal	PNRC2	0.156	inss_stage: 4s >= 4	0.046	236
UKv4_A_32_P99275	YTHDF2	kruskal	RBM25	0.164	inss_stage: 4s >= 4	0.046	236
UKv4_A_32_P99648	EIF4E3	kruskal	ZC3H8	-0.163	inss_stage: 4s < 4	0.047	236
UKv4_Hs121241.2	PCBP3	0.00108	MRPS16	-0.15	inss_stage: 4s < 4	0.047	236
UKv4_Hs151032.1	ERI3	0.00213	SUB1	-0.147	inss_stage: 4s < 4	0.047	236
UKv4_Hs356019.10	RPS5	kruskal	EIF2AK4 kinase	0.147	inss_stage: 4s >= 4	0.047	236
UKv4_Hs371342.4	ATXN1	6.74453	PPWD1	0.167	inss_stage: 4s >= 4	0.047	236
UKv4_Hs423444.8	SMG1	0.0287	DIMT1	-0.151	inss_stage: 4s < 4	0.048	236
UKv4_Hs7655.1	U2AF2	0.00815	EIF4H	0.118	inss_stage: 4s >= 4	0.048	236
UKv4_Hs81281.12	MRPS21	0.00142	RNMTL1	0.138	inss_stage: 4s >= 4	0.048	236
			,transcription factor
			,differentiation,kinase
			,membrane,signal transduction
			,transcription factor
			,signal transduction
			,cell cycle,signal transduction
			,kinase
			,transcription factor
			,drug target
			,signal transduction
			,membrane
			,signal transduction
			,signal transduction
			,transcription factor
			,differentiation
			,differentiation

## Sheet: Table S3 DE High-risk deaths
HUGO	R	Combi	pval (FDR)	Expressed in number of tumours (total is 176)
PRPF4	0.321	death_from_disease: 1 >= 0	0.035	176						#Program: R2: Genomics analysis and visualization platform
MRPL11	0.29	death_from_disease: 1 >= 0	0.033	176						#Website: http://r2.amc.nl
NIP7	0.281	death_from_disease: 1 >= 0	0.044	176						#Developer: Jan Koster (jankoster@amc.uva.nl)
RSL1D1	0.28	death_from_disease: 1 >= 0	0.031	176						#Support: r2-support@amc.uva.nl
DNAJC21	0.28	death_from_disease: 1 >= 0	0.034	176						#Date: Wed Mar 11 10:11:06 2020
DDX31	0.279	death_from_disease: 1 >= 0	0.029	176						#Dataset: ps_avgpres_gse49710geo498_ag44kcwolf
PINX1 cell cycle	0.279	death_from_disease: 1 >= 0	0.031	176						#Pretty_dataset: Tumor Neuroblastoma - SEQC - 498 - custom - ag44kcwolf
MRPL4	0.278	death_from_disease: 1 >= 0	0.028	176						#Genefiltering: applied
RPL7L1	0.278	death_from_disease: 1 >= 0	0.032	176						#Genefilters: RBPs_2014 only
BARD1 apoptosis	0.276	death_from_disease: 1 >= 0	0.03	176						#Data transformation: transform_2log
AFF2 development	0.276	death_from_disease: 1 >= 0	0.033	176						#Data values:
TARS2 drug target	0.273	death_from_disease: 1 >= 0	0.032	176						#Comparison: groups
ZC3H18	0.273	death_from_disease: 1 >= 0	0.042	176						#Track: death_from_disease
AIMP1	0.271	death_from_disease: 1 >= 0	0.031	176						#Group: death_from_disease -> 0
TSNAX	0.27	death_from_disease: 1 >= 0	0.034	176						#Group: death_from_disease -> 1
URB2	0.265	death_from_disease: 1 >= 0	0.03	176						#Test: kruskal
QRSL1	0.265	death_from_disease: 1 >= 0	0.044	176						#Output: kruskal 0.05 fdr
EEF1E1 DNA repair,apoptosis	0.264	death_from_disease: 1 >= 0	0.03	176						#Minimal presentcalls: 50
THOC6	0.264	death_from_disease: 1 >= 0	0.033	176						#Minimal highest expression: 50
LSM4	0.264	death_from_disease: 1 >= 0	0.046	176						#Subset: high_risk-1 (176)
POLR2E	0.262	death_from_disease: 1 >= 0	0.031	176						#Subset_string: high_risk-1:3a985b4983cda15406f8d44970da1a23
CTU2	0.262	death_from_disease: 1 >= 0	0.034	176						#Number of lines: 120
HNRNPCL1	0.261	death_from_disease: 1 >= 0	0.033	176						#r2filetype: datasetresult
XPOT	0.258	death_from_disease: 1 >= 0	0.031	176
TSN	0.258	death_from_disease: 1 >= 0	0.034	176
MPHOSPH6 cell cycle	0.257	death_from_disease: 1 >= 0	0.035	176
WDR5 development	0.257	death_from_disease: 1 >= 0	0.044	176
KARS drug target	0.256	death_from_disease: 1 >= 0	0.034	176
PSTK	0.256	death_from_disease: 1 >= 0	0.034	176
EIF2AK1 kinase	0.255	death_from_disease: 1 >= 0	0.034	176
YARS2 drug target	0.255	death_from_disease: 1 >= 0	0.034	176
PARP1 DNA repair,membrane	0.254	death_from_disease: 1 >= 0	0.033	176
MRPL54	0.253	death_from_disease: 1 >= 0	0.031	176
EIF3C	0.253	death_from_disease: 1 >= 0	0.033	176
PARN	0.25	death_from_disease: 1 >= 0	0.032	176
TARS drug target	0.25	death_from_disease: 1 >= 0	0.035	176
LONP1	0.249	death_from_disease: 1 >= 0	0.033	176
POLR2D	0.249	death_from_disease: 1 >= 0	0.044	176
RPP30	0.247	death_from_disease: 1 >= 0	0.033	176
EIF3I	0.246	death_from_disease: 1 >= 0	0.049	176
TTF2	0.245	death_from_disease: 1 >= 0	0.031	176
RPP40	0.244	death_from_disease: 1 >= 0	0.031	176
POLR2F	0.242	death_from_disease: 1 >= 0	0.035	176
TST	0.241	death_from_disease: 1 >= 0	0.033	176
SNRPG	0.241	death_from_disease: 1 >= 0	0.034	176
TSEN15	0.24	death_from_disease: 1 >= 0	0.031	176
MRPS2	0.24	death_from_disease: 1 >= 0	0.045	176
FUS	0.24	death_from_disease: 1 >= 0	0.045	176
KIAA0391	0.239	death_from_disease: 1 >= 0	0.034	176
MRPL42	0.239	death_from_disease: 1 >= 0	0.044	176
HDLBP membrane	0.239	death_from_disease: 1 >= 0	0.045	176
RPF2	0.238	death_from_disease: 1 >= 0	0.034	176
EIF2S1	0.237	death_from_disease: 1 >= 0	0.032	176
MRPS14	0.237	death_from_disease: 1 >= 0	0.032	176
MRPL14	0.236	death_from_disease: 1 >= 0	0.033	176
RBM38	0.234	death_from_disease: 1 >= 0	0.034	176
TUFM	0.233	death_from_disease: 1 >= 0	0.032	176
GSPT1 cell cycle	0.233	death_from_disease: 1 >= 0	0.049	176
PTRH1	0.232	death_from_disease: 1 >= 0	0.032	176
PDE12	0.232	death_from_disease: 1 >= 0	0.046	176
WDR43	0.231	death_from_disease: 1 >= 0	0.034	176
EIF2S2	0.231	death_from_disease: 1 >= 0	0.044	176
PPAN	0.231	death_from_disease: 1 >= 0	0.049	176
RARS	0.23	death_from_disease: 1 >= 0	0.034	176
BZW1	0.23	death_from_disease: 1 >= 0	0.034	176
SNRPF	0.23	death_from_disease: 1 >= 0	0.035	176
MBNL3 development	0.228	death_from_disease: 1 >= 0	0.049	176
CARHSP1 signal transduction	0.227	death_from_disease: 1 >= 0	0.039	176
MAK16	0.227	death_from_disease: 1 >= 0	0.045	176
G3BP1 signal transduction	0.227	death_from_disease: 1 >= 0	0.045	176
TXNL4B cell cycle	0.227	death_from_disease: 1 >= 0	0.048	176
WDR12	0.226	death_from_disease: 1 >= 0	0.034	176
METTL5	0.225	death_from_disease: 1 >= 0	0.037	176
ISG20L2	0.225	death_from_disease: 1 >= 0		176
RNASEH1	0.224	death_from_disease: 1 >= 0	0.031	176
MRPL18	0.224	death_from_disease: 1 >= 0	0.044	176
INTS7	0.223	death_from_disease: 1 >= 0	0.046	176
RPS15	0.223	death_from_disease: 1 >= 0	0.049	176
GAR1	0.222	death_from_disease: 1 >= 0	0.045	176
NOP16	0.222	death_from_disease: 1 >= 0	0.047	176
HNRNPF	0.221	death_from_disease: 1 >= 0	0.034	176
MRPL34	0.221	death_from_disease: 1 >= 0	0.044	176
MRPL44	0.221	death_from_disease: 1 >= 0	0.047	176
MRPL1	0.221	death_from_disease: 1 >= 0	0.05	176
LSM3	0.22	death_from_disease: 1 >= 0	0.044	176
RPL35	0.218	death_from_disease: 1 >= 0	0.044	176
DNMT1 drug target	0.217	death_from_disease: 1 >= 0	0.044	176
MRPL13	0.216	death_from_disease: 1 >= 0	0.044	176
TRMT1L	0.216	death_from_disease: 1 >= 0	0.049	176
SLIRP	0.214	death_from_disease: 1 >= 0	0.045	176
PNPT1	0.212	death_from_disease: 1 >= 0	0.044	176
EIF2AK2 apoptosis,cell cycle	0.21	death_from_disease: 1 >= 0	0.034	176
TRMT112	0.21	death_from_disease: 1 >= 0	0.044	176
EIF3G	0.21	death_from_disease: 1 >= 0	0.046	176
LARP7	0.21	death_from_disease: 1 >= 0		176
MRPL24	0.209	death_from_disease: 1 >= 0	0.048	176
PRPF40A	0.208	death_from_disease: 1 >= 0	0.032	176
TFB1M	0.208	death_from_disease: 1 >= 0	0.044	176
PTBP1	0.208	death_from_disease: 1 >= 0	0.046	176
PRIM1	0.208	death_from_disease: 1 >= 0	0.05	176
TRUB2	0.207	death_from_disease: 1 >= 0	0.035	176
SSB	0.206	death_from_disease: 1 >= 0	0.048	176
EIF4E2	0.206	death_from_disease: 1 >= 0	0.049	176
SRSF7	0.204	death_from_disease: 1 >= 0	0.034	176
IARS2 drug target	0.204	death_from_disease: 1 >= 0	0.044	176
EXOSC3	0.204	death_from_disease: 1 >= 0	0.05	176
DDX18	0.203	death_from_disease: 1 >= 0	0.049	176
SNRPE	0.202	death_from_disease: 1 >= 0	0.035	176
SMG1 DNA repair,kinase	0.202	death_from_disease: 1 >= 0	0.049	176
SNRPD2	0.2	death_from_disease: 1 >= 0	0.044	176
EIF1	0.2	death_from_disease: 1 >= 0	0.049	176
LSM7	0.2	death_from_disease: 1 >= 0	0.049	176
MRPL23	0.198	death_from_disease: 1 >= 0	0.044	176
GEMIN6	0.197	death_from_disease: 1 >= 0	0.044	176
MARS2	0.196	death_from_disease: 1 >= 0	0.045	176
MRPL51	0.195	death_from_disease: 1 >= 0	0.044	176
EXO1 DNA repair,cell cycle	0.194	death_from_disease: 1 >= 0	0.049	176
TRMT6	0.192	death_from_disease: 1 >= 0	0.044	176
DARS drug target	0.183	death_from_disease: 1 >= 0	0.049	176
RPS19BP1	0.177	death_from_disease: 1 >= 0	0.047	176
,development			0.031
,kinase			0.035

## Sheet: Table S4 EFS significance
ranking	hugo	probeset	corrected p-val	cut off (low expression group number)	group with worse outcome
1	MRPL11	UKv4_A_24_P32672	3.3e-21	414	high
2	GAR1	UKv4_A_23_P58280	7.6e-20	428	high
3	LSM4	UKv4_A_23_P153757	2.5e-19	413	high
4	LSM7	UKv4_A_23_P90463	6.8e-19	394	high
5	EXO1	UKv4_A_23_P23303	1.1e-18	389	high
6	SNRPF	UKv4_A_23_P117068	1.9e-18	456	high
7	THOC6	UKv4_A_23_P37949	1.9e-17	455	high
8	DKC1	UKv4_A_23_P137143	3.1e-17	437	high
9	THG1L	UKv4_A_23_P121956	5.3e-17	475	high
10	CCDC86	UKv4_A_23_P161918	9.3e-17	442	high
11	CELF6	UKv4_A_23_P140490	9.8e-17	200	low
12	FBL	UKv4_A_23_P78888	1.6e-16	363	high
13	RNASEH2C	UKv4_A_23_P116081	3.1e-16	447	high
14	RNASEH2A	UKv4_A_23_P164826	1.9e-15	339	high
15	PES1	UKv4_A_23_P132260	2.5e-15	490	high
16	RPL22L1	UKv4_A_23_P143958	4.5e-15	348	high
17	MRPS12	UKv4_A_23_P50807	6.7e-15	342	high
18	DDX39A	UKv4_A_23_P78664	7e-15	408	high
19	CPEB3	UKv4_A_23_P46812	7e-15	208	low
20	RRP9	UKv4_A_23_P6802	7.2e-15	417	high
21	MRPL3	UKv4_A_23_P18422	1.1e-14	381	high
22	MRPL16	UKv4_A_23_P47497	1.5e-14	400	high
23	SNRPE	UKv4_A_23_P126291	1.5e-14	375	high
24	SNRPD1	UKv4_A_23_P107644	2.2e-14	450	high
25	CPEB4	UKv4_A_23_P251937	2.3e-14	164	low
26	RAN	UKv4_A_32_P506600	2.4e-14	466	high
27	RUVBL1	UKv4_A_24_P148811	3.4e-14	348	high
28	RPL39	UKv4_A_32_P220307	3.5e-14	295	high
29	NPM1	UKv4_A_24_P188941	4.2e-14	430	high
30	HNRNPC	UKv4_A_23_P163006	5.1e-14	430	high
31	SRRM3	UKv4_A_23_P331700	5.9e-14	237	low
32	XPOT	UKv4_A_23_P340722	6e-14	472	high
33	PUS7	UKv4_A_23_P82478	8.1e-14	438	high
34	CELF4	UKv4_A_32_P183367	1.9e-13	150	low
35	NOP16	UKv4_A_23_P144726	2.2e-13	381	high
36	BYSL	UKv4_A_23_P145197	2.6e-13	474	high
37	SNRPD2	UKv4_A_24_P74160	2.7e-13	385	high
38	ZCCHC17	UKv4_A_23_P96976	1.1e-12	153	low
39	SMG6	UKv4_A_23_P100676	1.1e-12	199	low
40	SNRPD3	UKv4_A_23_P132216	1.1e-12	395	high
41	BZW2	UKv4_A_23_P157215	1.4e-12	368	high
42	PARP1	UKv4_A_23_P114783	1.7e-12	446	high
43	CELF2	UKv4_A_23_P202071	2.2e-12	171	low
44	RBFOX1	UKv4_A_23_P140858	2.4e-12	153	low
45	IPO4	UKv4_A_23_P162970	2.8e-12	331	high
46	BAZ2B	UKv4_A_23_P120048	2.8e-12	265	low
47	RPP40	UKv4_A_23_P111297	2.9e-12	410	high
48	TRMT112	UKv4_A_23_P12992	3.8e-12	416	high
49	MRPL52	UKv4_A_24_P409330	3.8e-12	338	high
50	MCTS1	UKv4_A_23_P114282	4e-12	355	high
51	CCDC59	UKv4_A_23_P105664	6.2e-12	442	high
52	PSMA6	UKv4_A_32_P43217	9.5e-12	360	high
53	ATXN1	UKv4_Hs371342.4	1.2e-11	122	low
54	U2AF1	UKv4_A_23_P6303	1.2e-11	417	high
55	MRPS14	UKv4_A_23_P62731	1.6e-11	428	high
56	BRCA1	UKv4_A_23_P207400	2.4e-11	429	high
57	METTL1	UKv4_A_23_P47788	2.4e-11	457	high
58	GRWD1	UKv4_A_23_P142154	2.9e-11	334	high
59	NUTF2	UKv4_A_23_P118038	4.3e-11	435	high
60	ZC3H8	UKv4_A_23_P108871	4.4e-11	426	high
61	RPS13	UKv4_A_23_P24763	6.2e-11	290	high
62	RBMX2	UKv4_A_23_P255153	6.4e-11	471	high
63	SNRPA	UKv4_A_24_P250335	7.2e-11	465	high
64	MRPL23	UKv4_A_23_P105044	8.4e-11	458	high
65	TST	UKv4_A_23_P29248	8.4e-11	310	high
66	CMSS1	UKv4_A_23_P132874	9.7e-11	420	high
67	THOC3	UKv4_A_32_P41405	1e-10	436	high
68	TRMT10C	UKv4_A_23_P166716	1.1e-10	437	high
69	CPEB2	UKv4_A_32_P225355	1.1e-10	224	low
70	TERT	UKv4_A_23_P110851	1.1e-10	427	high
71	EXOSC9	UKv4_A_23_P81121	1.4e-10	387	high
72	KIAA0020	UKv4_A_23_P20683	1.5e-10	441	high
73	MRPL51	UKv4_A_23_P99138	1.5e-10	382	high
74	MRPL42	UKv4_A_24_P352445	1.7e-10	480	high
75	WDR12	UKv4_A_23_P28625	1.9e-10	458	high
76	MAGOHB	UKv4_A_23_P2423	2.2e-10	387	high
77	EIF4E	UKv4_A_23_P118643	2.6e-10	440	high
78	ELAVL2	UKv4_A_23_P94571	2.7e-10	139	low
79	EIF3B	UKv4_A_23_P157072	2.7e-10	413	high
80	CNBP	UKv4_A_23_P84651	3.7e-10	468	high
81	EXOSC3	UKv4_A_23_P123905	3.7e-10	363	high
82	NXT2	UKv4_A_24_P91916	4.5e-10	418	high
83	PIWIL2	UKv4_A_32_P208654	4.9e-10	154	low
84	EEF2	UKv4_A_24_P87763	5e-10	398	high
85	UTP3	UKv4_A_23_P92424	5.1e-10	446	high
86	EIF2S1	UKv4_A_24_P138556	5.1e-10	342	high
87	SRRM4	UKv4_A_23_P391479	5.3e-10	257	low
88	ENDOG	UKv4_A_23_P83266	6.1e-10	376	high
89	RPS16	UKv4_A_23_P208850	6.4e-10	385	high
90	POLR2H	UKv4_A_23_P29803	7.5e-10	330	high
91	NPM3	UKv4_A_23_P52298	8.5e-10	445	high
92	RPL18A	UKv4_A_23_P90383	8.6e-10	355	high
93	RPS11	UKv4_A_23_P101532	8.7e-10	373	high
94	PTBP2	UKv4_A_23_P46396	1e-09	192	low
95	CTIF	UKv4_A_23_P207967	1e-09	241	low
96	NHP2	UKv4_A_24_P63608	1.3e-09	363	high
97	ALYREF	UKv4_A_23_P152984	1.3e-09	353	high
98	RPS7	UKv4_A_23_P141549	1.3e-09	406	high
99	DAZAP1	UKv4_A_23_P165247	1.6e-09	411	high
100	APEX1	UKv4_A_23_P151649	1.6e-09	347	high
101	CELF5	UKv4_A_23_P60775	1.7e-09	157	low
102	RNF113A	UKv4_A_23_P258071	1.7e-09	335	high
103	MRPL47	UKv4_A_23_P502425	1.9e-09	428	high
104	RBM8A	UKv4_A_23_P104116	2.1e-09	484	high
105	PIH1D1	UKv4_A_23_P90155	2.1e-09	383	high
106	SAMD4A	UKv4_A_23_P335661	2.4e-09	133	low
107	C17orf85	UKv4_A_23_P15669	2.5e-09	215	low
108	PTBP1	UKv4_A_24_P14367	2.6e-09	449	high
109	MRPS34	UKv4_A_23_P163496	2.9e-09	434	high
110	GEMIN6	UKv4_A_23_P56567	2.9e-09	326	high
111	AUH	UKv4_A_23_P20852	3.3e-09	200	low
112	HNRNPCL1	UKv4_A_24_P767422	3.4e-09	397	high
113	SRSF3	UKv4_A_23_P413761	3.7e-09	430	high
114	RPL41	UKv4_A_23_P128067	3.9e-09	418	high
115	RRP1B	UKv4_A_24_P944040	3.9e-09	447	high
116	GTPBP3	UKv4_A_23_P28068	4e-09	401	high
117	MRPL21	UKv4_A_23_P115955	4.1e-09	447	high
118	MRPS9	UKv4_A_23_P154315	4.3e-09	472	high
119	RUVBL2	UKv4_A_23_P39110	6.5e-09	307	high
120	ZNF239	UKv4_A_23_P86731	6.7e-09	408	high
121	HNRNPU	UKv4_A_23_P160862	7.4e-09	488	high
122	MAZ	UKv4_A_23_P33433	7.7e-09	354	high
123	BRIX1	UKv4_A_23_P252855	1e-08	430	high
124	EXOSC5	UKv4_A_24_P211151	1.1e-08	407	high
125	SNRPB	UKv4_A_23_P154675	1.1e-08	480	high
126	MBNL2	UKv4_A_24_P56317	1.1e-08	218	low
127	RPL35	UKv4_A_23_P112429	1.2e-08	427	high
128	MRPL9	UKv4_A_23_P34956	1.2e-08	419	high
129	QTRT1	UKv4_A_24_P96234	1.2e-08	446	high
130	EEF1B2	UKv4_A_32_P49616	1.3e-08	401	high
131	IPO7	UKv4_A_23_P331598	1.3e-08	453	high
132	PRPF40B	UKv4_A_23_P411922	1.7e-08	146	low
133	APOBEC3H	UKv4_A_32_P347617	1.7e-08	76	low
134	RBMX	UKv4_A_23_P96420	1.7e-08	443	high
135	URB2	UKv4_A_23_P74914	1.8e-08	472	high
136	TRNAU1AP	UKv4_A_23_P51781	2.1e-08	154	low
137	RPS5	UKv4_Hs356019.10	2.2e-08	340	high
138	NCL	UKv4_A_23_P5551	2.2e-08	468	high
139	EXOSC10	UKv4_A_23_P62868	2.4e-08	183	low
140	PTRH2	UKv4_A_23_P15493	2.4e-08	365	high
141	NXT1	UKv4_A_23_P251695	2.4e-08	467	high
142	TDRD7	UKv4_A_23_P123672	2.6e-08	227	low
143	ELAVL4	UKv4_A_24_P188447	2.7e-08	221	low
144	SLIRP	UKv4_A_23_P128991	2.8e-08	443	high
145	HNRNPD	UKv4_A_23_P58353	2.9e-08	377	high
146	RPS15	UKv4_A_24_P225010	2.9e-08	425	high
147	MRPS23	UKv4_A_23_P106998	3.2e-08	485	high
148	GTPBP1	UKv4_A_23_P103120	3.9e-08	406	high
149	ICT1	UKv4_A_23_P141194	4e-08	438	high
150	MRPS25	UKv4_A_23_P18135	4.1e-08	448	high
151	LSM3	UKv4_A_24_P29001	4.4e-08	418	high
152	NOB1	UKv4_A_23_P106822	4.7e-08	413	high
153	MTERFD2	UKv4_A_24_P737451	5.8e-08	244	low
154	RPP25L	UKv4_A_23_P169409	5.9e-08	445	high
155	SHQ1	UKv4_A_24_P299996	5.9e-08	437	high
156	RPL18	UKv4_A_23_P142146	5.9e-08	365	high
157	RPL36A	UKv4_A_23_P217609	7.3e-08	354	high
158	GNL1	UKv4_A_23_P404965	7.7e-08	130	low
159	HNRNPA3	UKv4_A_23_P17163	9.1e-08	447	high
160	ZC3H6	UKv4_A_32_P46510	1e-07	149	low
161	AIMP1	UKv4_A_23_P121686	1.2e-07	450	high
162	AIMP2	UKv4_A_23_P70991	1.2e-07	400	high
163	MRPL15	UKv4_A_23_P94174	1.3e-07	453	high
164	GAPDH	UKv4_A_23_P13899	1.4e-07	480	high
165	SNRPG	UKv4_A_23_P102235	1.7e-07	367	high
166	DDX1	UKv4_A_23_P108554	1.8e-07	411	high
167	AEN	UKv4_A_32_P85230	1.8e-07	452	high
168	SARS2	UKv4_A_23_P90484	1.8e-07	476	high
169	UBA52	UKv4_A_23_P56188	1.8e-07	373	high
170	DNMT1	UKv4_A_24_P408083	2.5e-07	392	high
171	GNL3	UKv4_A_32_P8120	2.6e-07	439	high
172	SNRNP25	UKv4_A_23_P152284	2.7e-07	306	high
173	RPS21	UKv4_A_23_P120660	3e-07	312	high
174	RBMS3	UKv4_A_32_P228618	3e-07	120	low
175	CDK9	UKv4_A_23_P169470	3.1e-07	169	low
176	EIF2S3	UKv4_Hs433518.5	3.1e-07	470	high
177	SUPT6H	UKv4_A_23_P141479	3.6e-07	131	low
178	ILF2	UKv4_A_23_P257956	3.9e-07	425	high
179	RPL10L	UKv4_A_23_P341325	4e-07	389	high
180	LUC7L3	UKv4_A_23_P207493	4.2e-07	89	low
181	PUS1	UKv4_A_23_P251771	4.4e-07	462	high
182	HNRNPAB	UKv4_A_23_P19084	4.8e-07	270	high
183	SIDT2	UKv4_A_23_P98402	5.1e-07	210	low
184	HNRNPF	UKv4_A_23_P75330	6.1e-07	383	high
185	EIF3M	UKv4_A_23_P150446	6.2e-07	349	high
186	UNKL	UKv4_A_23_P100141	6.8e-07	203	low
187	HNRNPUL1	UKv4_A_23_P502612	7.2e-07	354	high
188	HEATR1	UKv4_A_23_P103628	7.3e-07	445	high
189	RPL28	UKv4_A_23_P208358	7.3e-07	346	high
190	TDRD12	UKv4_A_32_P79763	7.5e-07	47	low
191	CNP	UKv4_A_23_P21838	7.8e-07	186	low
192	TTF2	UKv4_A_23_P97161	9e-07	490	high
193	MRPS18C	UKv4_A_23_P81212	9e-07	420	high
194	ADARB1	UKv4_A_23_P211207	9.1e-07	111	low
195	EIF4G3	UKv4_A_23_P126241	9.1e-07	175	low
196	ZC3H13	UKv4_A_24_P75376	9.2e-07	198	low
197	NONO	UKv4_A_24_P151727	9.5e-07	294	high
198	NSUN5	UKv4_A_23_P251505	1.1e-06	213	low
199	EEF1D	UKv4_A_23_P31833	1.1e-06	461	high
200	SRSF11	UKv4_A_23_P11664	1.2e-06	200	low
201	TRIT1	UKv4_A_23_P12062	1.2e-06	130	low
202	DDX10	UKv4_A_23_P32938	1.2e-06	439	high
203	PURG	UKv4_A_23_P111919	1.3e-06	206	low
204	PUM1	UKv4_A_23_P170820	1.3e-06	214	low
205	WDR3	UKv4_A_23_P23318	1.3e-06	441	high
206	TNRC6B	UKv4_A_23_P6481	1.3e-06	269	low
207	MKRN1	UKv4_A_23_P59798	1.5e-06	140	low
208	PPRC1	UKv4_A_23_P127079	1.6e-06	444	high
209	RRS1	UKv4_A_23_P146187	1.8e-06	214	high
210	PABPC5	UKv4_A_23_P84047	1.8e-06	135	low
211	POP7	UKv4_A_23_P134274	1.9e-06	352	high
212	RPS28	UKv4_A_23_P142475	1.9e-06	262	high
213	SRSF9	UKv4_A_24_P390070	1.9e-06	490	high
214	MRPL33	UKv4_A_24_P285480	2e-06	477	high
215	FAM120B	UKv4_A_24_P346181	2.2e-06	168	low
216	EEF1E1	UKv4_A_23_P156842	2.3e-06	442	high
217	G3BP1	UKv4_A_23_P336479	2.3e-06	460	high
218	CPSF3L	UKv4_A_23_P35030	2.3e-06	129	low
219	BAZ2A	UKv4_A_23_P203841	2.3e-06	139	low
220	NOP58	UKv4_A_23_P154447	2.4e-06	445	high
221	HNRNPA1L2	UKv4_A_32_P8015	2.4e-06	442	high
222	RPL36AL	UKv4_A_24_P159036	2.5e-06	371	high
223	PRIM1	UKv4_A_23_P25019	2.6e-06	444	high
224	GSPT1	UKv4_Hs2707.3	2.6e-06	464	high
225	RPL29	UKv4_A_32_P162004	2.7e-06	396	high
226	CPSF3	UKv4_A_23_P28688	2.7e-06	420	high
227	IGF2BP3	UKv4_A_23_P19987	2.7e-06	490	high
228	RBFOX2	UKv4_A_23_P103099	2.9e-06	202	low
229	NAA38	UKv4_A_24_P63969	2.9e-06	474	high
230	ZFP36L2	UKv4_A_23_P101960	2.9e-06	119	low
231	DDX6	UKv4_A_24_P215407	3.2e-06	205	low
232	RSL1D1	UKv4_A_23_P54597	3.3e-06	448	high
233	PTBP3	UKv4_A_24_P916614	3.3e-06	159	low
234	LRRFIP2	UKv4_A_23_P211806	3.4e-06	151	low
235	RBM5	UKv4_A_23_P18276	3.7e-06	148	low
236	RPL39L	UKv4_A_23_P29594	3.7e-06	468	high
237	ZCCHC11	UKv4_A_23_P34433	3.9e-06	126	low
238	FARSA	UKv4_A_23_P78685	4.1e-06	265	high
239	LRPPRC	UKv4_A_24_P26073	4.4e-06	468	high
240	EIF5A2	UKv4_A_24_P380022	4.7e-06	489	high
241	KARS	UKv4_A_23_P152487	4.8e-06	458	high
242	DNAAF2	UKv4_A_23_P14493	4.9e-06	401	high
243	POLR2F	UKv4_A_23_P80321	5.1e-06	422	high
244	MRPL30	UKv4_A_24_P302695	5.1e-06	486	high
245	RBM3	UKv4_A_23_P148308	5.4e-06	372	high
246	DUS3L	UKv4_A_23_P325547	5.4e-06	442	high
247	HNRNPM	UKv4_A_23_P16615	5.5e-06	490	high
248	HNRNPL	UKv4_A_32_P109572	5.7e-06	432	high
249	CPSF2	UKv4_A_23_P99837	5.8e-06	429	high
250	RPL36	UKv4_A_23_P153383	5.8e-06	402	high
251	RPP25	UKv4_A_23_P3424	5.9e-06	98	low
252	RPS3	UKv4_A_23_P139376	5.9e-06	457	high
253	MRPS2	UKv4_A_23_P135104	5.9e-06	420	high
254	RPLP2	UKv4_A_23_P147888	6e-06	381	high
255	NCBP1	UKv4_A_23_P257104	6.1e-06	450	high
256	RNASEL	UKv4_A_23_P390172	6.1e-06	145	low
257	TRA2B	UKv4_A_23_P212639	6.2e-06	379	high
258	RSL24D1	UKv4_A_23_P65768	6.7e-06	477	high
259	NOA1	UKv4_A_23_P7074	6.9e-06	369	high
260	PIWIL4	UKv4_A_23_P427760	7e-06	139	low
261	MRPL14	UKv4_A_23_P124035	7e-06	420	high
262	SBDS	UKv4_A_23_P70867	7e-06	214	low
263	SECISBP2L	UKv4_A_24_P82135	7.6e-06	319	low
264	WDR5	UKv4_A_23_P32558	8e-06	264	high
265	CAPRIN2	UKv4_A_23_P87532	8e-06	162	low
266	TARS	UKv4_A_23_P70168	8.7e-06	443	high
267	RPS10	UKv4_A_23_P356484	8.8e-06	484	high
268	HNRNPA0	UKv4_Hs77492.1	9.1e-06	487	high
269	MRPS30	UKv4_A_23_P252362	9.6e-06	391	high
270	TIA1	UKv4_A_24_P405430	9.6e-06	260	low
271	TARBP1	UKv4_A_23_P52058	9.7e-06	183	low
272	RPS19	UKv4_A_24_P134074	1e-05	366	high
273	RPL38	UKv4_A_23_P95879	1e-05	430	high
274	RRP1	UKv4_A_23_P80129	1e-05	415	high
275	SRSF4	UKv4_A_23_P126197	1.1e-05	138	low
276	NUFIP2	UKv4_A_24_P921144	1.2e-05	410	low
277	TRMT1	UKv4_A_23_P16683	1.2e-05	415	high
278	DCAF13	UKv4_A_23_P215875	1.3e-05	346	high
279	FTSJ1	UKv4_A_23_P22473	1.3e-05	434	high
280	UHMK1	UKv4_A_32_P84389	1.3e-05	268	low
281	EIF4E2	UKv4_A_23_P165722	1.3e-05	440	high
282	RPS15A	UKv4_A_32_P175580	1.3e-05	465	high
283	TUT1	UKv4_A_23_P53011	1.3e-05	345	high
284	SF3B5	UKv4_A_23_P19576	1.4e-05	471	high
285	CNOT7	UKv4_A_32_P170888	1.4e-05	457	high
286	TSEN34	UKv4_A_23_P130626	1.4e-05	404	high
287	MRPL50	UKv4_A_23_P253412	1.5e-05	405	high
288	SNRPN	UKv4_A_23_P77066	1.6e-05	179	low
289	SRPK2	UKv4_A_23_P406438	1.6e-05	163	low
290	CSTF1	UKv4_A_23_P362824	1.6e-05	401	high
291	RPS29	UKv4_A_24_P548354	1.7e-05	436	high
292	LSM5	UKv4_A_23_P93750	1.7e-05	353	high
293	DDX54	UKv4_A_32_P430359	1.7e-05	484	high
294	MRPL4	UKv4_A_23_P164702	1.7e-05	472	high
295	RC3H1	UKv4_A_23_P103334	1.7e-05	89	low
296	SRSF6	UKv4_A_32_P11786	1.8e-05	466	high
297	KPNB1	UKv4_A_32_P184727	1.8e-05	378	high
298	ZCCHC6	UKv4_A_23_P123727	1.8e-05	227	low
299	SF3B1	UKv4_A_32_P31633	1.9e-05	306	low
300	CLK1	UKv4_A_23_P16817	1.9e-05	115	low
301	ELAVL3	UKv4_A_23_P218492	2e-05	287	low
302	NOC3L	UKv4_A_23_P202496	2.1e-05	456	high
303	ABCE1	UKv4_A_23_P41380	2.3e-05	425	high
304	ENOX1	UKv4_A_23_P128574	2.3e-05	76	low
305	FIP1L1	UKv4_A_23_P58337	2.4e-05	419	high
306	DDX21	UKv4_A_24_P146603	2.6e-05	430	high
307	PAPD7	UKv4_A_23_P18824	2.7e-05	487	high
308	PAPOLB	UKv4_A_24_P945312	2.9e-05	183	low
309	RPS25	UKv4_A_23_P47357	2.9e-05	427	high
310	DUS1L	UKv4_A_23_P255569	3e-05	389	high
311	RBM47	UKv4_A_23_P132910	3e-05	47	low
312	VARS	UKv4_A_23_P258714	3e-05	489	high
313	SRRM1	UKv4_A_24_P11131	3e-05	186	low
314	NIP7	UKv4_A_23_P54834	3.1e-05	363	high
315	PDCD7	UKv4_A_24_P159181	3.1e-05	163	low
316	DHX37	UKv4_A_23_P13914	3.2e-05	272	high
317	R3HDM2	UKv4_A_23_P10374	3.3e-05	105	low
318	GNL3L	UKv4_A_24_P100351	3.4e-05	321	high
319	DIMT1	UKv4_A_23_P58529	3.8e-05	385	high
320	RBM38	UKv4_A_23_P17430	3.9e-05	324	high
321	GTPBP4	UKv4_A_23_P12874	4e-05	352	high
322	LSM11	UKv4_A_32_P46526	4.1e-05	455	high
323	EXOSC4	UKv4_A_23_P32463	4.2e-05	253	high
324	SFSWAP	UKv4_A_32_P109704	4.2e-05	217	low
325	RPL27A	UKv4_A_23_P203577	4.5e-05	441	high
326	MRPS24	UKv4_A_23_P42884	4.7e-05	348	high
327	ZC3HAV1	UKv4_A_23_P425224	5.1e-05	259	low
328	PAN2	UKv4_A_23_P64689	5.3e-05	190	low
329	RPS24	UKv4_A_23_P1206	5.3e-05	476	high
330	ZFP36L1	UKv4_A_23_P99540	5.4e-05	199	low
331	LAS1L	UKv4_A_23_P256021	5.4e-05	471	high
332	IPO5	UKv4_A_23_P205007	5.5e-05	456	high
333	DARS2	UKv4_A_23_P148984	5.9e-05	490	high
334	PRKDC	UKv4_A_23_P9603	6.2e-05	342	high
335	SF3B14	UKv4_A_23_P165402	6.3e-05	442	high
336	MOV10L1	UKv4_A_23_P143774	6.4e-05	64	low
337	MRPL12	UKv4_A_23_P170352	6.4e-05	341	high
338	MRPL36	UKv4_A_24_P371758	6.5e-05	446	high
339	TYW5	UKv4_A_32_P36942	6.5e-05	214	low
340	ZNF768	UKv4_A_23_P15218	6.5e-05	433	high
341	HENMT1	UKv4_A_23_P309361	6.7e-05	156	low
342	TARSL2	UKv4_A_23_P129128	7e-05	92	low
343	MRPS17	UKv4_A_23_P258321	7.2e-05	424	high
344	RBM43	UKv4_A_32_P496952	7.4e-05	287	low
345	ZNF598	UKv4_A_23_P100292	7.4e-05	365	high
346	ZFR2	UKv4_A_32_P55462	7.7e-05	318	low
347	FUS	UKv4_A_23_P106887	8e-05	485	high
348	RBMS1	UKv4_A_23_P431410	8.2e-05	124	low
349	GPATCH4	UKv4_A_23_P97265	8.3e-05	344	high
350	DDX17	UKv4_A_24_P925611	8.7e-05	353	low
351	RPUSD2	UKv4_A_23_P309850	8.8e-05	478	high
352	RPL9	UKv4_A_23_P7066	8.9e-05	474	high
353	IPO11	UKv4_A_23_P30264	8.9e-05	479	high
354	LUC7L2	UKv4_A_23_P59791	8.9e-05	191	low
355	RARS	UKv4_A_23_P69988	9.3e-05	383	high
356	MRPL48	UKv4_A_23_P162106	9.6e-05	411	high
357	TRNT1	UKv4_A_23_P372331	0.0001	472	high
358	N4BP1	UKv4_A_23_P432610	0.00011	371	low
359	CASC3	UKv4_A_23_P374284	0.00012	234	low
360	EARS2	UKv4_A_23_P152353	0.00012	465	high
361	FXR1	UKv4_A_23_P132784	0.00013	367	high
362	MRPL17	UKv4_A_23_P87257	0.00013	366	high
363	TRA2A	UKv4_A_24_P929807	0.00014	240	low
364	KHSRP	UKv4_A_23_P16157	0.00014	443	high
365	RRP15	UKv4_A_23_P23356	0.00014	474	high
366	POLR2I	UKv4_A_23_P56256	0.00015	274	high
367	GTPBP2	UKv4_A_23_P379026	0.00016	271	low
368	RPUSD4	UKv4_A_23_P75540	0.00016	433	high
369	MRPL46	UKv4_A_23_P37584	0.00017	457	high
370	SNRPB2	UKv4_A_23_P40307	0.00017	352	high
371	APOBEC2	UKv4_A_23_P70387	0.00017	118	low
372	SLBP	UKv4_A_23_P7101	0.00018	418	high
373	ERI3	UKv4_Hs151032.1	0.00018	296	low
374	XRCC6	UKv4_A_23_P120942	0.00019	481	high
375	GPATCH8	UKv4_A_24_P359117	0.0002	184	low
376	POLR2L	UKv4_A_23_P33022	0.00021	403	high
377	TFB2M	UKv4_A_23_P45940	0.00023	407	high
378	SRA1	UKv4_A_24_P20753	0.00024	124	low
379	CNOT4	UKv4_A_23_P300781	0.00025	237	low
380	LARP1B	UKv4_A_23_P353744	0.00025	405	high
381	UPF3A	UKv4_A_23_P99473	0.00025	178	low
382	R3HDM1	UKv4_A_23_P380998	0.00026	252	low
383	RPS14	UKv4_A_23_P81492	0.00026	488	high
384	DDX50	UKv4_A_23_P104451	0.00026	389	high
385	TCOF1	UKv4_A_23_P310317	0.00027	363	high
386	EIF4G1	UKv4_A_23_P218892	0.00028	296	high
387	TDRD9	UKv4_A_32_P208350	0.00029	137	low
388	SUPT4H1	UKv4_A_23_P163942	0.00029	444	high
389	RPF1	UKv4_A_23_P359616	0.00029	483	high
390	PSTK	UKv4_A_23_P12866	0.00032	479	high
391	IFIT2	UKv4_A_23_P24004	0.00033	129	low
392	RPS17	UKv4_A_24_P418418	0.00033	293	high
393	RPS4X	UKv4_A_23_P125519	0.00033	267	high
394	RPP30	UKv4_A_23_P138453	0.00034	340	high
395	INTS7	UKv4_A_23_P52082	0.00034	478	high
396	UTP15	UKv4_A_23_P213441	0.00034	456	high
397	TLR7	UKv4_A_23_P85240	0.00038	49	low
398	TSEN15	UKv4_A_23_P104022	0.00039	416	high
399	FRG1	UKv4_A_23_P121773	0.0004	410	high
400	YBX2	UKv4_A_23_P49865	0.0004	234	low
401	DHX58	UKv4_A_23_P38346	0.0004	24	low
402	ZC3H12D	UKv4_A_24_P187826	0.00041	102	low
403	ILF3	UKv4_A_23_P218456	0.00041	464	high
404	QTRTD1	UKv4_A_23_P91930	0.00042	280	high
405	MRPS16	UKv4_A_24_P12932	0.00042	289	high
406	ZCCHC14	UKv4_A_23_P100420	0.00043	245	low
407	STRBP	UKv4_A_23_P252155	0.00045	420	high
408	GLTSCR2	UKv4_A_23_P39125	0.00045	416	high
409	CLK4	UKv4_A_23_P61674	0.00046	38	low
410	SNRNP70	UKv4_A_23_P4902	0.00048	119	low
411	ZRANB2	UKv4_A_24_P242299	0.00048	153	low
412	TRMT12	UKv4_A_23_P82913	0.00049	408	high
413	GEMIN2	UKv4_A_23_P88194	0.00049	485	high
414	MTRF1	UKv4_A_23_P37005	0.00049	239	low
415	EIF1B	UKv4_A_23_P6891	0.0005	197	low
416	PEG10	UKv4_A_23_P82503	0.00052	250	low
417	RPS3A	UKv4_A_32_P208178	0.00055	457	high
418	RNASEH2B	UKv4_A_23_P140088	0.00055	454	high
419	NAT10	UKv4_A_23_P87329	0.00057	270	high
420	INTS1	UKv4_A_24_P66672	0.00057	160	low
421	RANBP17	UKv4_A_23_P58819	0.00058	468	high
422	HEXIM1	UKv4_A_23_P118552	0.00059	87	low
423	MRPL1	UKv4_A_23_P84821	0.00061	453	high
424	IFIH1	UKv4_A_23_P68155	0.00062	40	low
425	LRRC47	UKv4_A_23_P96777	0.00065	112	low
426	GUF1	UKv4_A_32_P4943	0.00066	441	high
427	CCNT2	UKv4_A_24_P174341	0.00067	204	low
428	TLR8	UKv4_A_23_P73837	0.00067	131	low
429	LSM2	UKv4_A_23_P59153	0.00068	483	high
430	PARP12	UKv4_A_23_P111804	0.00071	133	low
431	TRMT6	UKv4_A_23_P210747	0.00073	352	high
432	EIF3G	UKv4_A_23_P38887	0.00076	430	high
433	PCBP2	UKv4_Hs63525.18	0.00076	399	high
434	PAN3	UKv4_A_23_P385938	0.00079	188	low
435	TFAM	UKv4_A_23_P202258	0.00079	399	high
436	PWP2	UKv4_A_23_P102925	0.00083	318	high
437	RPS2	UKv4_A_23_P106708	0.00087	448	high
438	RBMY1A1	UKv4_A_24_P357406	0.0009	73	low
439	MRPL44	UKv4_A_23_P90589	0.0009	488	high
440	EIF2AK1	UKv4_A_23_P251173	0.00092	480	high
441	POLR1E	UKv4_A_23_P9458	0.00098	411	high
442	SPATS2	UKv4_A_23_P99303	0.001	263	low
443	SNRPC	UKv4_A_23_P59192	0.001	480	high
444	CARHSP1	UKv4_A_23_P38085	0.001	484	high
445	PNRC2	UKv4_A_23_P103201	0.0011	140	low
446	WDR4	UKv4_A_23_P211302	0.0011	413	high
447	UNK	UKv4_A_32_P514790	0.0011	71	low
448	DQX1	UKv4_A_23_P56659	0.0012	75	low
449	ZFC3H1	UKv4_A_23_P150950	0.0012	137	low
450	CACTIN	UKv4_A_23_P372144	0.0012	470	high
451	DGCR8	UKv4_A_24_P113521	0.0012	44	low
452	PQBP1	UKv4_A_23_P62139	0.0012	354	high
453	ZC3H18	UKv4_A_23_P3502	0.0012	488	high
454	CDC5L	UKv4_A_23_P156471	0.0012	198	low
455	SPEN	UKv4_A_24_P345193	0.0013	163	low
456	CNOT10	UKv4_A_23_P112652	0.0013	472	high
457	DDX49	UKv4_A_23_P16573	0.0014	296	high
458	SRSF7	UKv4_A_23_P39704	0.0014	473	high
459	RPSA	UKv4_A_32_P156237	0.0015	443	high
460	RPL35A	UKv4_A_23_P44956	0.0016	481	high
461	AFF1	UKv4_A_24_P414332	0.0016	137	low
462	RPS20	UKv4_A_23_P168898	0.0016	408	high
463	FAU	UKv4_A_32_P11471	0.0016	412	high
464	BARD1	UKv4_A_23_P67771	0.0016	463	high
465	PTRHD1	UKv4_A_24_P16036	0.0017	300	high
466	RPL10	UKv4_A_32_P184367	0.0017	357	high
467	AFF3	UKv4_A_24_P366670	0.0018	161	low
468	EIF3E	UKv4_A_23_P43141	0.0018	461	high
469	KHDC1	UKv4_A_24_P20814	0.0018	132	low
470	USP39	UKv4_A_32_P101301	0.0019	475	high
471	EIF4B	UKv4_A_23_P162679	0.002	484	high
472	GRSF1	UKv4_A_23_P212937	0.002	471	high
473	EIF1AX	UKv4_A_23_P35194	0.002	470	high
474	CWC25	UKv4_A_23_P38115	0.002	123	low
475	RIOK3	UKv4_A_23_P55578	0.002	174	low
476	FUBP1	UKv4_A_23_P45699	0.0021	383	high
477	EIF2B2	UKv4_A_23_P25929	0.0021	380	high
478	DDX55	UKv4_A_23_P47839	0.0022	490	high
479	DRG2	UKv4_A_23_P141656	0.0022	133	low
480	TDRD10	UKv4_A_32_P7974	0.0023	267	low
481	MECP2	UKv4_A_24_P237486	0.0023	250	low
482	RPS27	UKv4_A_24_P148235	0.0023	367	high
483	KIAA0391	UKv4_A_23_P14340	0.0024	365	high
484	PRPF8	UKv4_A_32_P402521	0.0024	129	low
485	NXF3	UKv4_A_23_P171336	0.0024	358	low
486	MTO1	UKv4_A_23_P145068	0.0025	205	low
487	POLR2E	UKv4_A_23_P165280	0.0025	468	high
488	NOL8	UKv4_A_23_P71591	0.0025	389	high
489	TRMU	UKv4_A_23_P80389	0.0025	67	low
490	HDLBP	UKv4_A_23_P131417	0.0025	452	high
491	MRPS27	UKv4_A_23_P133332	0.0025	443	high
492	DYNC1H1	UKv4_A_23_P128706	0.0026	179	low
493	IGF2BP1	UKv4_A_23_P83498	0.0027	386	high
494	RPL13	UKv4_A_24_P142228	0.0027	395	high
495	MRPL39	UKv4_A_23_P143446	0.0027	485	high
496	RBM48	UKv4_A_23_P71111	0.0027	147	low
497	TEFM	UKv4_A_24_P365048	0.0028	223	low
498	MRPS22	UKv4_A_23_P72138	0.0028	286	high
499	DAP3	UKv4_A_23_P63067	0.0028	449	high
500	RPL12	UKv4_A_23_P217068	0.0029	405	high
501	PCBP4	UKv4_A_23_P166807	0.0029	49	low
502	NOP10	UKv4_A_23_P54477	0.0029	290	high
503	EEF1G	UKv4_A_23_P13344	0.0031	308	high
504	KIAA0430	UKv4_A_23_P26674	0.0031	166	low
505	EIF4A1	UKv4_A_23_P137103	0.0033	486	high
506	SSB	UKv4_A_23_P154025	0.0033	488	high
507	MRPL22	UKv4_A_23_P122233	0.0033	441	high
508	CD3EAP	UKv4_A_23_P208310	0.0033	163	high
509	IPO13	UKv4_A_23_P115036	0.0034	166	low
510	MRPL34	UKv4_A_24_P125690	0.0034	288	high
511	LSM14A	UKv4_A_23_P56069	0.0034	457	high
512	MRPL54	UKv4_A_23_P101742	0.0034	481	high
513	LARP7	UKv4_A_23_P84070	0.0035	347	high
514	ELAVL1	UKv4_A_32_P200165	0.0036	303	high
515	NYNRIN	UKv4_A_23_P129005	0.0036	329	low
516	EFTUD1	UKv4_A_23_P152055	0.0037	488	high
517	DDX20	UKv4_A_23_P63153	0.0037	487	high
518	EIF6	UKv4_A_23_P210939	0.0037	204	high
519	SART1	UKv4_A_23_P86884	0.0038	314	high
520	DDX28	UKv4_A_23_P106633	0.0038	347	high
521	PURA	UKv4_A_23_P41755	0.0038	27	low
522	THOC7	UKv4_A_32_P136402	0.0039	471	high
523	SMNDC1	UKv4_A_23_P127233	0.0039	338	high
524	YARS2	UKv4_A_23_P151093	0.0039	485	high
525	RRNAD1	UKv4_A_23_P12010	0.0041	221	low
526	DDX31	UKv4_A_23_P60405	0.0042	426	high
527	ZFP36	UKv4_A_23_P39237	0.0042	336	low
528	NGDN	UKv4_A_23_P76841	0.0042	121	high
529	ADAR	UKv4_A_24_P362317	0.0043	273	low
530	RPLP1	UKv4_A_23_P37445	0.0045	333	high
531	RPS23	UKv4_A_32_P84605	0.0045	466	high
532	SUB1	UKv4_A_23_P59921	0.0046	426	high
533	RPL8	UKv4_A_23_P31654	0.0046	188	high
534	DDX56	UKv4_A_24_P935622	0.0047	133	low
535	DIS3	UKv4_A_23_P48416	0.0048	213	low
536	RBM28	UKv4_A_23_P168629	0.0049	444	high
537	CXorf23	UKv4_A_24_P841677	0.005	34	low
538	RPL14	UKv4_A_23_P18292	0.005	456	high
539	HNRNPA1	UKv4_A_32_P42197	0.0053	292	high
540	RPLP0	UKv4_A_32_P184796	0.0054	475	high
541	DDX26B	UKv4_A_23_P363647	0.0056	210	low
542	UPF3B	UKv4_A_24_P310630	0.0057	324	high
543	SF3A3	UKv4_A_32_P63913	0.0057	489	high
544	PA2G4	UKv4_A_32_P11181	0.0058	472	high
545	TFB1M	UKv4_A_23_P93499	0.0059	311	low
546	RPL23	UKv4_A_23_P26713	0.006	483	high
547	XAB2	UKv4_A_24_P2093	0.0066	467	high
548	DDX4	UKv4_A_23_P256624	0.0067	163	low
549	KIN	UKv4_A_24_P317874	0.0068	351	high
550	RPS6	UKv4_A_23_P123563	0.0069	456	high
551	SRSF1	UKv4_A_23_P49517	0.0071	380	high
552	EIF3D	UKv4_A_23_P91699	0.0071	489	high
553	RBM4	UKv4_A_23_P13033	0.0071	262	high
554	UTP20	UKv4_A_23_P162525	0.0073	433	high
555	CWC27	UKv4_A_23_P92629	0.0073	461	high
556	TRMT13	UKv4_A_24_P396557	0.0074	216	low
557	DDX60L	UKv4_A_23_P30069	0.0075	227	low
558	CSTF3	UKv4_A_23_P98310	0.0079	488	high
559	WDR46	UKv4_A_24_P389038	0.0079	296	high
560	AFF4	UKv4_A_24_P286079	0.0079	141	low
561	HRSP12	UKv4_A_23_P134714	0.008	225	high
562	RBM24	UKv4_A_23_P167812	0.0082	188	low
563	ALKBH5	UKv4_A_23_P153050	0.0083	206	low
564	LSM6	UKv4_A_23_P259451	0.0083	459	high
565	DHX9	UKv4_A_23_P97749	0.0084	485	high
566	SNIP1	UKv4_A_24_P276531	0.0084	117	low
567	ZC3H12C	UKv4_A_23_P388993	0.0085	276	low
568	PAIP2	UKv4_A_23_P213754	0.0086	182	low
569	RNASEH1	UKv4_A_23_P27167	0.0087	490	high
570	CHTOP	UKv4_A_24_P265539	0.0089	486	high
571	DNAJC17	UKv4_A_23_P140698	0.0091	33	low
572	POP5	UKv4_A_23_P99216	0.0091	135	low
573	IGF2BP2	UKv4_A_23_P250156	0.0098	147	low
574	TSEN54	UKv4_A_23_P147277	0.011	247	high
575	ANGEL1	UKv4_A_23_P363406	0.011	356	low
576	RNASEK	UKv4_A_24_P205230	0.011	365	low
577	HELZ	UKv4_A_23_P100693	0.011	134	low
578	MRPL18	UKv4_A_23_P8339	0.011	279	high
579	EIF4ENIF1	UKv4_A_23_P132263	0.011	360	low
580	ZC3H12A	UKv4_A_23_P326160	0.011	131	low
581	NOL10	UKv4_A_24_P34505	0.012	449	high
582	ERAL1	UKv4_A_23_P71981	0.012	311	low
583	EIF3H	UKv4_A_23_P9061	0.012	360	high
584	MRPL37	UKv4_A_23_P135474	0.012	481	high
585	TSFM	UKv4_A_23_P64650	0.012	488	high
586	MRPS7	UKv4_A_23_P3979	0.013	328	high
587	NUDT21	UKv4_A_24_P287756	0.013	483	high
588	CAPRIN1	UKv4_A_32_P235872	0.013	300	high
589	PIN4	UKv4_A_23_P315345	0.013	183	low
590	RRP12	UKv4_A_23_P24192	0.013	252	high
591	RNASE11	UKv4_A_23_P65472	0.013	34	low
592	LSM1	UKv4_A_23_P20384	0.013	354	high
593	EIF5	UKv4_A_24_P415959	0.014	459	high
594	BMS1	UKv4_A_23_P24068	0.014	262	high
595	ZNF346	UKv4_A_23_P258124	0.014	114	low
596	ZC3H7B	UKv4_A_23_P218807	0.014	254	low
597	RPL37	UKv4_A_32_P235128	0.015	280	high
598	POLR2A	UKv4_A_24_P99679	0.015	224	low
599	NSRP1	UKv4_A_23_P27180	0.015	368	low
600	NOVA1	UKv4_A_23_P205435	0.015	313	low
601	RBM6	UKv4_A_23_P57941	0.016	55	low
602	SMAD9	UKv4_A_23_P2814	0.016	68	low
603	MAEL	UKv4_A_23_P114934	0.016	77	low
604	RCL1	UKv4_A_23_P9152	0.016	308	high
605	PPIL4	UKv4_A_23_P42507	0.016	303	low
606	THRAP3	UKv4_A_24_P926367	0.016	39	low
607	CNOT8	UKv4_A_23_P110846	0.016	245	low
608	AFF2	UKv4_A_23_P217468	0.016	460	high
609	MRPS5	UKv4_A_23_P28538	0.016	490	high
610	APOBEC3G	UKv4_A_23_P143713	0.017	67	low
611	TARBP2	UKv4_A_23_P87603	0.017	232	low
612	MAGOH	UKv4_A_23_P200216	0.017	485	high
613	MRP63	UKv4_A_24_P398670	0.017	449	high
614	MVP	UKv4_A_23_P88819	0.017	87	low
615	TXNL4A	UKv4_A_23_P130304	0.018	317	high
616	CPSF4	UKv4_A_23_P42997	0.019	241	low
617	QKI	UKv4_A_24_P940426	0.019	290	low
618	RPS12	UKv4_A_23_P82128	0.019	473	high
619	RNASE6	UKv4_A_23_P3014	0.02	290	low
620	POLR2B	UKv4_A_23_P144311	0.02	489	high
621	NOL9	UKv4_A_24_P379450	0.02	125	low
622	IARS	UKv4_A_23_P258964	0.02	463	high
623	WDR43	UKv4_A_23_P344853	0.02	417	high
624	RBM7	UKv4_A_23_P138975	0.02	246	low
625	NOM1	UKv4_A_23_P55904	0.02	164	low
626	R3HCC1	UKv4_A_23_P421221	0.021	249	low
627	TBL3	UKv4_A_23_P106720	0.021	467	high
628	MRPL28	UKv4_A_23_P129513	0.021	410	high
629	MRPS11	UKv4_A_23_P48977	0.021	420	high
630	SIDT1	UKv4_A_23_P132515	0.022	388	low
631	ABCF1	UKv4_A_23_P251660	0.022	490	high
632	MRPS18B	UKv4_A_23_P59107	0.022	181	low
633	SRSF8	UKv4_A_32_P17635	0.023	197	low
634	REXO2	UKv4_A_23_P150365	0.025	466	high
635	RPL31	UKv4_A_24_P213783	0.025	419	high
636	EIF4E3	UKv4_A_32_P99648	0.025	214	low
637	THUMPD3	UKv4_A_23_P212213	0.025	456	high
638	TEP1	UKv4_A_23_P65481	0.026	144	low
639	TBRG4	UKv4_A_23_P215658	0.027	340	high
640	HBS1L	UKv4_A_23_P254379	0.028	220	low
641	YRDC	UKv4_A_23_P62840	0.028	451	high
642	EXOSC6	UKv4_A_23_P100413	0.029	310	low
643	EIF2D	UKv4_A_23_P115346	0.029	463	high
644	FASTK	UKv4_A_23_P502930	0.029	157	low
645	UTP6	UKv4_A_23_P164237	0.029	131	low
646	POLR2D	UKv4_A_23_P209778	0.029	313	high
647	PRPF19	UKv4_A_23_P52978	0.029	373	high
648	CELF3	UKv4_A_23_P337849	0.03	165	low
649	DDX60	UKv4_A_23_P41470	0.03	52	low
650	BUD13	UKv4_A_23_P52826	0.031	446	high
651	MRPS6	UKv4_A_23_P102890	0.031	429	high
652	EXOSC1	UKv4_A_23_P35591	0.031	354	high
653	ARHGEF28	UKv4_A_23_P81298	0.031	50	low
654	RBM15B	UKv4_A_23_P121405	0.032	150	high
655	SYF2	UKv4_A_23_P45756	0.033	215	low
656	NXF1	UKv4_A_23_P13359	0.034	313	low
657	PLD6	UKv4_A_23_P360626	0.034	489	high
658	MRPS18A	UKv4_A_23_P122387	0.035	444	high
659	RBM34	UKv4_A_23_P436476	0.035	387	high
660	PABPC1L	UKv4_A_24_P92183	0.035	87	low
661	SNRNP200	UKv4_A_23_P131626	0.038	480	high
662	SLC4A1AP	UKv4_A_23_P56810	0.038	134	low
663	FAM98C	UKv4_A_23_P369983	0.038	45	low
664	DDX19B	UKv4_A_23_P140994	0.038	472	high
665	ZNF326	UKv4_A_23_P85969	0.039	415	high
666	RPL13A	UKv4_Hs317989.2	0.04	382	high
667	RPL15	UKv4_A_24_P257359	0.04	471	high
668	PTGES3	UKv4_A_32_P30813	0.04	322	high
669	ZC3H4	UKv4_A_24_P220618	0.041	489	high
670	MEX3A	UKv4_A_24_P857404	0.041	488	high
671	EIF3K	UKv4_A_23_P90264	0.041	271	high
672	PRPF3	UKv4_A_23_P97573	0.042	490	high
673	RPL24	UKv4_A_23_P256933	0.042	440	high
674	CLP1	UKv4_A_23_P87141	0.042	163	high
675	CWF19L1	UKv4_A_23_P35354	0.042	403	high
676	NXF5	UKv4_A_23_P114353	0.043	483	high
677	RPL34	UKv4_A_24_P303118	0.043	381	high
678	TRMT44	UKv4_A_23_P29985	0.044	88	low
679	NANOS3	UKv4_A_24_P703830	0.045	26	low
680	TRMT1L	UKv4_A_24_P190877	0.047	215	low
681	XPO5	UKv4_A_23_P256855	0.049	489	high
682	RBPMS2	UKv4_A_23_P100056	0.049	126	low
683	RPP14	UKv4_A_24_P114496	0.049	379	high
684	LUZP4	UKv4_A_23_P96611	0.049	365	low
685	CNOT1	UKv4_A_24_P193570	0.049	481	high
